1 **PMRT1, a *Plasmodium* specific parasite plasma membrane transporter is essential for asexual**  
2 **and sexual blood stage development**

3

4 Jan Stephan Wichers<sup>1,2,3</sup>, Paolo Mesén-Ramírez<sup>2</sup>, Jing Yu-Strzelczyk<sup>4</sup>, Gwendolin Fuchs<sup>1,2,3</sup>,  
5 Jan Stäcker<sup>2</sup>, Heidrun von Thien<sup>1,2</sup>, Arne Alder<sup>1,2,3</sup>, Isabelle Henshall<sup>5</sup>, Benjamin Liffner<sup>5</sup>,  
6 Georg Nagel<sup>4</sup>, Christian Löw<sup>1,6</sup>, Danny Wilson<sup>5,7</sup>, Tobias Spielmann<sup>2</sup>, Shiqiang Gao<sup>4#</sup>, Tim-  
7 Wolf Gilberger<sup>1,2,3,#</sup>, Anna Bachmann<sup>1,2,3,&</sup>, Jan Strauss<sup>1,2,3,6,#,&,†</sup>

8

9 <sup>1</sup>Centre for Structural Systems Biology, 22607 Hamburg, Germany.

10 <sup>2</sup>Bernhard Nocht Institute for Tropical Medicine, 20359 Hamburg, Germany.

11 <sup>3</sup>Biology Department, University of Hamburg, 20146, Hamburg, Germany

12 <sup>4</sup>Institute of Physiology, Department of Neurophysiology, Biocenter, University of Wuerzburg,  
13 97070 Würzburg, Germany

14 <sup>5</sup>Research Centre for Infectious Diseases, School of Biological Sciences, University of  
15 Adelaide, Adelaide 5005, Australia.

16 <sup>6</sup>European Molecular Biology Laboratory, Hamburg Unit, Hamburg, Germany

17 <sup>7</sup>Burnet Institute, 85 Commercial Road, Melbourne 3004, Victoria, Australia.

18

19 #Corresponding authors: [gao.shiqiang@uni-wuerzburg.de](mailto:gao.shiqiang@uni-wuerzburg.de), [gilberger@bnitm.de](mailto:gilberger@bnitm.de),  
20 [jan.strauss@geomar.de](mailto:jan.strauss@geomar.de)

21 &Contributed equally

22 †Present address: GEOMAR Helmholtz Centre for Ocean Research Kiel, 24105 Kiel, Germany

23

24 ORCID:

|                         |                     |
|-------------------------|---------------------|
| 25 Jan Stephan Wichers: | 0000-0002-0599-1742 |
| 26 Paolo Mesén-Ramírez: | 0000-0001-7842-5867 |
| 27 Jing Yu-Strzelczyk:  | 0000-0002-7576-6831 |
| 28 Gwendolin Fuchs:     | 0000-0001-9294-6984 |
| 29 Jan Stäcker:         | 0000-0002-4738-6639 |
| 30 Arne Alder:          | 0000-0003-4918-4640 |
| 31 Isabelle Henshall:   | 0000-0002-5906-0687 |
| 32 Benjamin Liffner:    | 0000-0002-1573-6139 |
| 33 Danny Wilson:        | 0000-0002-5073-1405 |
| 34 Georg Nagel:         | 0000-0001-8174-8712 |
| 35 Christian Löw:       | 0000-0003-0764-7483 |
| 36 Tobias Spielmann:    | 0000-0002-3968-4601 |
| 37 Shiqiang Gao:        | 0000-0001-6190-9443 |
| 38 Tim-Wolf Gilberger:  | 0000-0002-7965-8272 |
| 39 Anna Bachmann:       | 0000-0001-8397-7308 |
| 40 Jan Strauss:         | 0000-0002-6208-791X |

41

42

43 **Abstract**

44 Membrane transport proteins perform crucial roles in cell physiology. The obligate intracellular  
45 parasite *Plasmodium falciparum*, an agent of human malaria, relies on membrane transport  
46 proteins for the uptake of nutrients from the host, disposal of metabolic waste, exchange of  
47 metabolites between organelles and generation and maintenance of transmembrane  
48 electrochemical gradients for its growth and replication within human erythrocytes. Despite  
49 their importance for *Plasmodium* cellular physiology, the functional roles of a number of  
50 membrane transport proteins remain unclear, which is particularly true for orphan membrane  
51 transporters that have no or limited sequence homology to transporter proteins in other  
52 evolutionary lineages. Therefore, in the current study, we applied endogenous tagging,  
53 targeted gene disruption, conditional knockdown and knockout approaches to investigate the  
54 subcellular localization and essentiality of six membrane transporters during intraerythrocytic  
55 development of *P. falciparum* parasites. They are localized at different subcellular structures –  
56 the food vacuole, the apicoplast, and the parasite plasma membrane – and showed essentiality  
57 of four out of the six membrane transporters during asexual development. Additionally, the  
58 plasma membrane resident transporter 1 (PMRT1, PF3D7\_1135300), a unique *Plasmodium*-  
59 specific plasma membrane transporter, was shown to be essential for gametocytogenesis.  
60 Heterologous expression of wild-type and mutation constructs in *Xenopus laevis* oocytes  
61 indicated ion transport upon membrane hyperpolarization and a functional role of negatively  
62 charged amino acids protruding into the parasitophorous vacuole lumen. Overall, we reveal  
63 the importance of four orphan transporters to blood stage *P. falciparum* development and  
64 provide the first functional characterization of *Pf*PMRT1, an essential parasite membrane  
65 transporter.

66 **Importance (150 words)**

67 *Plasmodium falciparum*-infected erythrocytes possess multiple compartments with designated  
68 membranes. Transporter proteins embedded in these membranes do not only facilitate  
69 movement of nutrients, metabolites and other molecules between these compartments, but  
70 are common therapeutic targets and can also confer antimalarial drug resistance. Orphan  
71 membrane transporter in *P. falciparum* without sequence homology to transporters in other  
72 evolutionary lineages and distant to host transporters may constitute attractive targets for novel  
73 intervention approaches. Here, we localized six of these putative transporters at different  
74 subcellular compartments and probed into their importance during asexual parasite growth  
75 using reverse genetic approaches. In total, only two candidates turned out to be dispensable  
76 for the parasite, highlighting four candidates as putative targets for therapeutic interventions.  
77 This study reveals the importance of several orphan transporters to blood stage *P. falciparum*  
78 development and provides the first functional characterization of *Pf*PMRT1, an essential  
79 parasite membrane transporter.

## 80 Introduction

81 *Plasmodium* spp. malaria parasites inhabit diverse intracellular niches and need to import  
82 nutrients and export waste across both, host-cell and parasite membranes. Despite this, there  
83 are less than 150 putative membrane transporters encoded in the genome of *Plasmodium*  
84 *falciparum*, the most virulent malaria parasite, making up only 2.5% of all encoded genes (*P.*  
85 *falciparum* 3D7 v3.2: 5280 genes) (1–5), which is reduced compared to other unicellular  
86 organisms of similar genome size. The loss of redundant transporters is a typical feature of  
87 many intracellular parasites (6) and, as a result, the proportion of transporters that are  
88 indispensable for parasite survival increases (2), some of which have been shown to be critical  
89 for the uptake of several anti-Plasmodial compounds and/or to be involved in drug resistance  
90 (7–20). Moreover, the parasite's intracellular lifestyle resulted in the evolution of additional  
91 specialized transporters without human homologues (1). During its intraerythrocytic  
92 development, the parasite relies on the uptake of nutrients, such as amino acids, pantothenate  
93 or fatty acids, from its host erythrocyte as well as from the extracellular blood plasma (21–24).  
94 As *P. falciparum* resides in a parasitophorous vacuole (PV) in the host erythrocyte, nutrients  
95 acquired from the extracellular milieu must traverse multiple membranes: the erythrocyte  
96 plasma membrane (EPM), the parasitophorous vacuole membrane (PVM), the parasite  
97 plasma membrane (PPM) and eventually membranes of intracellular organelles, such as those  
98 of the apicoplast or mitochondria (21, 25–27). The unique requirements of malaria parasite  
99 survival have led to the evolution of a number of orphan transporters, whose localization or  
100 function cannot be predicted based on sequence homology to transporters in other organisms  
101 (4, 28). Despite the likely importance of uniquely adapted transporters to *P. falciparum* survival,  
102 subcellular localization, essentiality, function and substrate specificity for most *P. falciparum*  
103 transporters has not been directly determined (2, 21, 26). The best functional evidence  
104 available for many *Plasmodium*-specific transporters comes from a recent knockout screen of  
105 these orphan transporters in the rodent malaria parasite *Plasmodium berghei* (28). However,  
106 whether observations for different transporters in the *P. berghei* model are directly  
107 transferrable to *P. falciparum* have yet to be examined. Therefore, in this study, we explored  
108 the localization and essentiality of four predicted orphan transporters that had been partially  
109 characterised in *P. berghei* and included two additional transporters with no experimental  
110 characterization available.

## 111 Results

112 A subset of orphan transporters characterized in the *P. berghei* malaria model was selected  
113 for further characterization in *P. falciparum*. The four transporters selected were reported to be  
114 important at different stages of rodent malaria parasite growth with i) *P. berghei*  
115 drug/metabolite transporter 2 (*PfDMT2*: PF3D7\_0716900) found to be essential for asexual  
116 blood stage development, ii) *P. berghei* zinc transporter 1 (*PfZIP1*: PF3D7\_0609100) was

117 essential across transmission stages but not blood stages, where there was only a slight  
118 growth defect, iii) *P. berghei* cation diffusion facilitator family protein (*Pf*CDF: PF3D7\_0715900)  
119 knockout parasites had a defect during transmission stages but not during asexual stages, and  
120 iv) *P. berghei* major facilitator superfamily domain-containing protein (*Pf*MFS6:  
121 PF3D7\_1440800) was found to be essential for parasite transmission from mosquitos to a new  
122 host, with a growth defect observed at asexual and gametocyte stages but not during mosquito  
123 stage parasite growth (28, 29). In order to confirm expression of these transporters in *P.*  
124 *falciparum* asexual stages, we screened the list of “Genes coding for transport proteins”  
125 included in the Malaria Parasite Metabolic Pathways (MPMP) database (1, 30) for proteins  
126 with i) RNA-seq (31, 32) and ii) proteomics evidence (33, 34) for expression in asexual blood  
127 stages. We identified two additional putative transporters (PF3D7\_0523800, PF3D7\_1135300)  
128 which had yet to be functionally characterized in the *P. berghei* screen by Kenthirapalan *et al.*  
129 (28) or any other experimental model. Both were subsequently included in our characterization  
130 of *P. falciparum* orphan transporters, and named as ‘food vacuole resident transporter 1’  
131 (FVRT1: PF3D7\_0523800) and as ‘plasma membrane resident transporter 1’ (PMRT1:  
132 PF3D7\_1135300) based on their subcellular localization. AlphaFold-based structure  
133 predictions (35) and results from structure homology search (36) of all six selected transporters  
134 are provided in [Figure S1](#).

### 135 **Localization of putative *P. falciparum* transporters**

136 To determine subcellular localization, we tagged the six putative transporters endogenously  
137 with GFP using the selection-linked integration (SLI) system (37) ([Figure 1A](#)). Additionally, a  
138 glmS ribozyme sequence was included in the 3’UTR, which enabled conditional gene  
139 knockdown upon addition of glucosamine (38). Correct integration of the plasmid into the  
140 respective genomic locus was verified by PCR and expression of the GFP-fusion protein was  
141 confirmed by Western blot for each generated cell line ([Figure S2A, B](#)).

142 All transgenic cell lines expressed the GFP-fusion protein, demonstrating that these  
143 transporters are expressed in asexual blood stage parasites ([Figure 1B-G, S2A](#)). Expression  
144 levels were sufficient to allow determination of subcellular localization ([Figure 1B-G](#)): (i)  
145 PF3D7\_0523800-GFP localized to the food vacuole, (ii) *Pf*DMT2-GFP and *Pf*MFS6-GFP  
146 apicoplast localization, and (iii) *Pf*ZIP1-GFP and PF3D7\_1135300-GFP parasite plasma  
147 membrane (PPM) localization. However, *Pf*CDF-GFP showed an obscure staining pattern with  
148 a weak spot within the parasite cytosol in ring and trophozoite state parasites, but multiple foci  
149 in schizont stages ([Figure 1D](#)). To pinpoint this localization, an additional cell line with  
150 endogenously 3xHA-tagged *Pf*CDF was generated, confirming the focal localization of *Pf*CDF  
151 in asexual stages ([Figure S2C](#)).

152 Except for *Pf*CDF, the observed localizations of the other five transporters were confirmed by  
153 co-localization studies using appropriate episomally expressed marker proteins: P40PX-

154 mCherry (39, 40) for the food vacuole, ACP-mCherry (41, 42) for apicoplast and Lyn-mCherry  
155 (37, 43) for PPM. The focal distribution of *Pf*CDF-GFP was co-localized with a rhoptry (ARO-  
156 mCherry (44, 45)) and a micronemes (AMA1-mCherry (46, 47)) marker, but *Pf*CDF-GFP did  
157 not colocalize with either marker (Figure 1H). Additionally, for *Pf*ZIP and PF3D7\_1135300 the  
158 PPM localization was further confirmed in free merozoites (Figure S2D, E). Accordingly, as  
159 noted above, we named PF3D7\_0523800 as 'food vacuole resident transporter 1' (FVRT1)  
160 and PF3D7\_1135300 as 'plasma membrane resident transporter 1' (PMRT1).

### 161 **Targeted-gene disruption (TGD), conditional knockdown and conditional knockout of** 162 **putative transporters**

163 In order to test whether the putative transporters are essential for *P. falciparum* during its  
164 intraerythrocytic cycle, we first tried to functionally inactivate them by targeted gene disruption  
165 (TGD) using the SLI system (37) (Figure S3A). TGD cell lines were successfully obtained for  
166 *Pf*ZIP1 and *Pf*CDF (Figure S3B, C). For *Pf*ZIP1-TGD, the correct integration of the plasmid  
167 into the genomic locus and absence of wildtype locus was verified by PCR and subsequent  
168 growth experiments revealed no growth defect compared to *P. falciparum* 3D7 wildtype  
169 parasites (Figure S2B), suggesting its redundancy during asexual parasite proliferation. For  
170 *Pf*CDF-TGD the correct integration of the plasmid into the genomic locus was also verified, but  
171 wildtype DNA was still detectable and remained even upon prolonged culturing under  
172 G418/WR selection and limited dilution cloning (Figure S3C). In contrast, six (*Pf*PMRT1,  
173 *Pf*DMT2) or eight (*Pf*FVRT1, *Pf*MFS6) independent attempts to obtain TGD cell lines for the  
174 other four transporters with the respective plasmids failed, indicating that these genes have an  
175 indispensable role in blood stage parasite growth.

176 To probe into the function of the putative transporters where we were unable to generate gene-  
177 knockout parasites, we utilized the glmS ribozyme sequence. The corresponding sequence  
178 was integrated into the 3'UTR of the targeted genes. This enabled the induction of conditional  
179 degradation of respective mRNAs upon addition of glucosamine (38) and the assessment of  
180 the phenotypic consequences. Upon addition of 2.5 mM glucosamine to young ring stage  
181 parasites we found a 76.8% (+/- SD 3.7) reduction in GFP fluorescence intensity in *Pf*DMT2-  
182 GFP parasites, 72.7% (+/- SD 9.4) reduction in *Pf*MFS6-GFP and a 77.7% (+/- SD 6.1)  
183 reduction in *Pf*PMRT1-GFP in schizonts of the same cycle (Figure 2A–C, S4A–C). No  
184 measurable reduction in fluorescence intensity could be detected for *Pf*FVRT1-GFP or *Pf*CDF-  
185 GFP expressing parasite lines (Figure S4D–F). For parasite cell lines with a significant  
186 reduction in the expression of the endogenously tagged protein, proliferation was analyzed in  
187 the absence and presence of 2.5 mM glucosamine (Figure 2D, S4G). While no significant effect  
188 on growth was observed for *Pf*MFS6 and *Pf*PMRT1, a growth reduction of 68.5 % (+/- SD 2.1)  
189 over two cycles was observed upon knockdown of *Pf*DMT2. For *Pf*PMRT1, a minor growth  
190 delay was measurable, which resulted in a reduced parasitemia at day 3 upon knockdown

191 using both, 2.5 mM or 5 mM glucosamine (Figure 2E), and fewer newly formed ring stage  
192 parasites at 84 hours post invasion (hpi) (Figure 2F) were observed.

193 To better characterize the minor growth phenotype of *PfPMRT1*-GFP-*glmS* parasites that  
194 might be due to incomplete knockdown, we generated a conditional *PfPMRT1* knockout cell  
195 line (*condΔPMRT1*) using the Dimerizable Cre (DiCre) system (48, 49). Again using the SLI  
196 system (37), the endogenous *PfPMRT1* was disrupted upstream of the region encoding the N-  
197 terminal transmembrane domain, but, at the same time introducing a recodonized second  
198 functional copy of *PfPMRT1* flanked by loxP sites in the genomic locus. This loxP-flanked allelic  
199 copy of *PfPMRT1* encodes an additional 3x hemagglutinin (HA) tag, which can be conditionally  
200 excised upon addition of a rapamycin analog (rapalog) via the enzymatic activity of an  
201 episomally expressed DiCre (Figure 3A). First, correct integration of the plasmid into the  
202 genomic locus was verified by PCR (Figure 3B). Second, expression and localization of the  
203 recodonized HA-tagged protein at the PPM was verified by colocalization with the merozoite  
204 plasma membrane marker MSP1 (50) (Figure 3C). Third, excision of the recodonized gene  
205 upon rapalog addition was confirmed on genomic level by PCR (Figure 3D) and on protein  
206 level by Western blot analysis at 24 hpi and 48 hpi (Figure 3E). To assess the effect of  
207 conditional *PfPMRT1* knockout on parasite proliferation, we determined growth of the  
208 transgenic parasite cell line with and without rapalog over five days (Figure 3F, S5A). In  
209 contrast to the *glmS*-based knockdown experiment, DiCre-based gene excision (induced by  
210 the addition of rapalog to young ring stages of *condΔPMRT1* parasite cell cultures) abolished  
211 growth within the first replication cycle (Figure 3F, S5A). The specificity of the observed growth  
212 phenotype was verified by gene complementation. To achieve this, we episomally expressed  
213 recodonized *PfPMRT1* with TY1-epitope tag either under the constitutive *nmd3* or the weaker  
214 *sf3a2* promoter (51) in the *condΔPMRT1* cell line (Figure 3D, F, S5B, C). Correct localization  
215 of the TY1-tagged *PfPMRT1* at the PPM was verified by immunofluorescence assays (IFA)  
216 (Figure 3G). Notably both, complementation of the *PfPMRT1* knockout cell line (*condΔPMRT1*)  
217 with recodonized *PfPMRT1* either under control of the constitutive *nmd3* or the weaker *sf3a2*  
218 promoter, restored parasite growth (Figure 3F, S5B, C). The level of growth restoration with  
219 low level expression of recodonized *PfPMRT1* is in line with the results from *glmS*-knockdown  
220 experiments, which showed that a reduction of about 75% in protein expression resulted only  
221 in a minor growth perturbation (Figure 2C, D).

### 222 **Loss of the PPM-localized *PfPMRT1* leads to an arrest of parasite development at** 223 **trophozoite stage and the formation of vacuoles**

224 To determine, which particular parasite stages are affected by the knockout of *PfPMRT1*, we  
225 added rapalog to tightly synchronized parasites at different time points (4, 20 and 32 hpi)  
226 (Figure 4A) and monitored parasite growth by flow cytometry. Additionally, we quantified  
227 growth perturbation by microscopy of Giemsa smears at 4, 20, 24, 32, 40, 48, 72 and 96 hpi

228 (Figure 4B, S6A, B). When adding rapalog at 4 hpi, parasite development progressed through  
229 ring and early trophozoite stages up to 24 hpi with no visible abnormality. Afterwards, parasites  
230 with deformed and enlarged vacuoles started to appear and further development occurred to  
231 be stalled. At 32 hpi, almost all parasites had developed to late trophozoites/early schizonts in  
232 the control, whereas these stages were completely absent in *PfPMRT1*-deficient parasites.  
233 Over 50% of the parasites were pycnotic or possessed large vacuoles, the remaining parasites  
234 stayed arrested at the trophozoite stage. Quantification of the percentage of parasites with  
235 vacuoles between 20 hpi and 32 hpi revealed 94.8% (+/- SD 4.0) vacuole-positive parasites  
236 (Figure 4C). The activation of gene excision at later time points by adding rapalog at 20 hpi or  
237 32 hpi resulted in no or minor growth perturbation in the first cycle with successful re-invasion,  
238 but again led to parasites arresting at the trophozoite stage in the second cycle with an  
239 accumulation of vacuoles (Figure 4A, S6A, B).

240 In order to get further insights into the morphological changes in *PfPMRT1*-deficient parasites  
241 with its vacuolization, we incubated these parasites with dihydroethidium (DHE) to visualize  
242 the parasite cytosol (40). We observed an absence of staining in the vacuoles, suggesting they  
243 are not filled with parasite cytosol (Figure 4D). Next, we transfected the *condΔPMRT1* cell line  
244 with a plasmid encoding the PPM marker Lyn-mCherry (37) and observed Lyn-mCherry-  
245 positive vacuoles upon knockout of *PfPMRT1* starting to become visible at 24 hpi, indicating  
246 that the vacuoles originate from the PPM (Figure 4E). In line with this, vacuole membranes  
247 were also stainable with BODIPY TR C5 ceramide in *condΔPMRT1* parasites at 32 hpi (Figure  
248 4F).

#### 249 **Depletion of *PfPMRT1* results in an early arrest of gametocyte development**

250 RNA-seq data suggest *PfPMRT1* is also expressed during other developmental stages, such  
251 as gametocytes (52, 53). Therefore, we assessed expression of *PfPMRT1*-GFP during  
252 gametocytogenesis by re-engineering *PfPMRT1*-GFP-*glmS* in the inducible gametocyte  
253 producer (iGP) '3D7-iGP (55)' parasite line, which allows the robust induction of sexual  
254 commitment by conditional expression of gametocyte development 1 protein (GDV1) upon  
255 addition of shield-1 (55) (Figure S7A). We show that *PfPMRT1* is indeed expressed during all  
256 stages of gametocytogenesis and again localizes to the PPM, colocalizing with the PPM-  
257 marker Lyn-mCherry (37) (Figure 5A, B). Conditional knockdown of *PfPMRT1* via the *glmS*-  
258 ribozyme system (Figure S7B) resulted in a reduction in *PfPMRT1*-GFP fluorescence intensity  
259 of 79.4% (+/- SD 9.2%) at 7 days post induction (dpi) or 75.5% (+/- SD 23.2%) at 10 dpi, without  
260 an effect on gametocyte development (Figure S7C–F). In order to exclude that a role of  
261 *PfPMRT1* in gametocytogenesis is covered by only a partial knockdown resulting in low levels  
262 of expressed protein and to determine if *PfPMRT1* is essential for gametocytogenesis, we  
263 episomally expressed GDV1-GFP-DD in the *condΔPMRT1* parasite line, enabling conditional  
264 induction of sexual commitment upon addition of shield 1 in these parasites (56). Conditional

265 knockout of *PfPMRT1* in these transgenic parasites at day three post gametocyte induction  
266 resulted in pycnotic parasites from day 5 onwards, while excision of *PfPMRT1* at day 5 post  
267 induction had no effect on gametocyte development (Figure 5C, D). Excision of the  
268 recodonized gene upon rapalog addition was confirmed at a genomic level by PCR for both  
269 conditions (Figure 5E). Quantification of parasite stages at day 10 post induction of GDV1  
270 expression revealed 77.9% (+/- SD 7.7%) gametocytes and 22.1% (+/- SD 7.7%) pycnotic  
271 parasites in the control, while 100% of parasites were already pycnotic in the cultures, with  
272 induced knockout by addition of rapalog at day 3 post gametocyte induction by GDV1  
273 expression (Figure 5F). This data indicates that *PfPMRT1* is important for early gametocyte  
274 development.

### 275 **PMRT1 is unique to the genus *Plasmodium* and interspecies complementation assays** 276 **showed partial functional conservation**

277 *PfPMRT1* shows a lack of sequence similarities with known or putative transporters and/or  
278 conserved domains shared with known transporter families (2, 5). Our phylogenetic analysis  
279 revealed that homologs of *PfPMRT1* are present across *Plasmodium* species with amino acid  
280 sequence identities of about 90% in the subgenus *Laverania*, but about 50% outside *Laverania*  
281 (Figure 6A). However, prediction of the protein structure using AlphaFold (35) indicates two  
282 bundles of four transmembrane helices with reasonable similarity of the C-terminal bundle with  
283 the photosynthetic reaction center Maquette-3 protein (57) (RMSD of 3.12) (Figure 6B, Figure  
284 S1B). In order to test for functional conservation, we expressed the *PfPMRT1* homologs of *P.*  
285 *vivax* (PVP01\_0936100) and *P. knowlesi* (PKNH\_0933400) episomally as C-terminal Ty-1  
286 fusion proteins under the *nmd3* promoter in the *condΔPMRT1* parasites. Both protein variants  
287 localized correctly at the PPM, as shown by IFA (Figure 6C), and were able to partially restore  
288 growth after two cycles to 64.8% (+/- SD 9.8%) and 65.1% (+/- SD 7.4%) compared to the  
289 control (Figure 6D, S8). Excision of the recodonized endogenous *Pfpmrt1* gene upon rapalog  
290 addition was confirmed at a genomic level by PCR (Figure 6E). These data indicate that  
291 PMRT1 is functionally conserved within the genus *Plasmodium*.

### 292 **Functional characterization of *PfPMRT1* in *Xenopus* oocytes revealed** 293 **hyperpolarization-activated ion transport activity**

294 *PfPMRT1* encodes a 410 amino acid protein with eight predicted (58) transmembrane domains  
295 (TM) (Figure S1). The N- and C-terminal parts of *PfPMRT1* are both predicted (59) to be facing  
296 the cytosolic side of the parasite. Surface electrostatics indicate a clear polarity of *PfPMRT1*  
297 with negative charges facing the parasitophorous vacuole (PV) lumen and positive charges  
298 inside the parasite cytosol (Figure 7A). The loops protruding into the PV lumen of *PfPMRT1*  
299 are generally larger than the cytosolic loops and possess several negatively charged amino  
300 acids, especially the first loop between TM1 and TM2 with 10 negatively charged amino acids.



301 In contrast, the loop between TM4 and TM5 on the parasite cytosol (PC) side contains six  
302 positively charged amino acids. These two stretches of charged amino acids were  
303 hypothesized to be important for protein function and were replaced with neutral amino acids  
304 to test this hypothesis (Figure 7B). Full-length, WT *PfPMRT1* as well as the two mutants  
305 (MutPV, with sequence **EDDIDEYNIKGNEEE** modified to **QNAIAQYNIKGNAAA**; MutPC, with  
306 sequence **KIEKHFRKKF** modified to **AIQAAFAMAF**), each as C-terminal eYFP fusion  
307 proteins, were expressed in *Xenopus laevis* oocytes in order to characterize its function (Figure  
308 7D). The *PfPMRT1*-WT expressing oocytes showed significant inward currents when clamped  
309 at -160 mV, indicating a hyperpolarization-activated ion transport (Figure 7C). The current of  
310 MutPV-expressing oocytes was significantly reduced compared to *PfPMRT1*-WT ( $W = 10$ ,  $n_1$   
311  $= 10$ ,  $n_2 = 7$ ,  $P = 0.0147$ , two tailed Wilcoxon rank sum test), while in MutPC-expressing oocytes  
312 the observed current was only slightly smaller than in WT controls (Figure 7D, E), suggesting  
313 that the negatively charged amino acids of the first loop protruding into the PV lumen are  
314 important for the function of *PfPMRT1*. To translate these results to the parasite, we expressed  
315 *PfPMRT1*-WT and the two sequence mutants as C-terminal Ty-1 fusion complementation  
316 constructs under the *nmd3* promoter in *condΔPfPMRT1* parasites. These experiments  
317 showed, that *PfPMRT1*-MutPC was able to completely restore parasite growth, while  
318 *PfPMRT1*-MutPV showed only 59.2% (SD +/- 9.5) growth compared to the control after two  
319 developmental cycles (Figure 7F, G, S9 A–C). These data support the functional role of the  
320 negatively charged amino acids of the first loop protruding into the parasitophorous vacuole  
321 lumen for transport activity during the intraerythrocytic developmental cycle of the parasite.

## 322 Discussion

323 To date, the predicted 'transportome' of *P. falciparum* consists of 117 putative transport  
324 systems (encoded by 144 genes) classified as channels ( $n=19$ ), carriers ( $n=69$ ), and pumps  
325 ( $n=29$ ) (2). Functions of the vast majority of transporter genes were inferred from sequence  
326 homology to model organisms, however, given their lack of homology, 39 gene products could  
327 not be associated with any functional or subcellular localization and were categorized as  
328 orphan transporters accordingly (4). Here, we concentrated on four candidates from the orphan  
329 group, which were already partially characterized in *P. berghei*, and included two additional so  
330 far uncharacterized putative transporter proteins.

331 We localized *PfFVRT1*-GFP – annotated on PlasmoDB (60) as putative divalent metal  
332 transporter – at the food vacuole of the parasite, which is in line with a previously predicted  
333 food vacuole association (1) and its reported homology (1, 61) to the conserved eukaryotic  
334 endosomal/lysosomal natural resistance-associated macrophage protein (NRAMP)  
335 transporter (62) in our structure similarity search. Repeated attempts to generate a TGD cell  
336 line failed, indicating an important role of this transporter during asexual blood stage

337 development which is in agreement with data from a *P. falciparum* genome wide essentiality  
338 screen (63).

339 In concordance with recently published data identifying *PbDMT2* and *PbMFS6* as leaderless  
340 apicoplast transporters (29), we localized GFP-fusion proteins of *PfDMT2* and *PfMFS6* at the  
341 apicoplast. Successful knockdown of *PfDMT2* resulted in a growth defect in the second cycle  
342 after induction, resembling the described delayed death phenotype of other apicoplast genes  
343 that were functionally inactivated (29, 64–66). It suggests an essential role of *PfDMT2* in  
344 apicoplast physiology, as observed by Sayers *et al.* (29) for the rodent malaria *P. berghei*. This  
345 is further supported by our failed attempts to disrupt this gene using the SLI system.

346 We also failed to disrupt the *PfMFS6* locus, which is in agreement with the gene knockout  
347 studies in *P. berghei* that led to a markedly decreased multiplication rate (28, 29, 67).  
348 Nevertheless, glmS-based knock-down, although comparable to *PfDMT2*-GFP knockdown  
349 (72.7% versus 76.8% reduction in GFP fluorescence, respectively) had no effect on parasite  
350 proliferation in our study. This might indicate that these reduced levels of *PfMFS6*, in contrast  
351 to reduced levels of *PfDMT2*, are sufficient for normal asexual replication *in vitro*.

352 Another candidate, *PfCDF*, annotated as putative cation diffusion facilitator family protein,  
353 showed multiple cytosolic foci within the parasite with no co-localization with apical organelle  
354 markers. The homologue in *Toxoplasma gondii*, *TgZnT* (TgGT1\_251630) shows a similar  
355 cellular distribution (68). It has recently been shown to transport  $Zn^{2+}$ , to localize to vesicles at  
356 the plant-like vacuole in extracellular tachyzoites and to be present at dispersed vesicles  
357 throughout the cytoplasm of intracellular tachyzoites (68). Our data suggests that *PfCDF* is not  
358 essential for parasite *in vitro* blood stage development even though we were not able to  
359 generate a clonal wild-type free TGD cell line. Its redundancy is further supported by published  
360 data, showing that CDF proteins are non-essential for *in vivo* blood stage development in *P.*  
361 *yoelli* (69) and *P. berghei* (28, 67) and by its high (1.0) mutagenesis index score in a *P.*  
362 *falciparum* genome-wide mutagenesis screen (63).

363 Finally, two putative transporters, *PfZIP1* and *PfPMRT1*, localized to the PPM. We show that  
364 *PfZIP1* is non-essential for *P. falciparum* *in vitro* blood stage development, in line with a high  
365 (0.7) mutagenesis index score in a *P. falciparum* genome-wide mutagenesis screen (63).  
366 However, this is in contrast to the reported strong fitness loss in *P. berghei* (67) knockout  
367 mutants and failed knockout attempts in *P. yoelli* and *P. berghei* *in vivo* mouse models (29,  
368 69). These observations may reflect differences between *Plasmodium* species or differing  
369 requirements for *in vitro* and *in vivo* growth conditions.

370 *PfPMRT1* is annotated as a conserved *Plasmodium* membrane protein with unknown function.  
371 It has been described as a protein showing structural characteristics of a transporter, without  
372 sharing sequence similarities with known or putative transporters and/or conserved domains  
373 of known transporter families (2, 5). Our phylogenetic analysis confirmed *PMRT1* as unique

374 for *Plasmodium* species with high sequence conservation only within the *Laverania* subgenus  
375 (70). In line with data from genome-wide mutagenesis screens (63, 67) and reported failed  
376 knockout attempts in *P. yoelli* (69), we found that *PfPMRT1* is essential for parasite growth, as  
377 its functional inactivation resulted in growth arrest at the trophozoite stage accompanied by the  
378 accumulation of PPM-derived vacuoles within the parasite. In contrast, conditional knockdown  
379 resulted only in a growth delay, indicating that minor residual *PfPMRT1* protein levels appear  
380 to be sufficient to promote parasite growth. This finding was validated by episomal expression  
381 of an allelic copy under the control of the weak *sf3a2* promoter (51) in the *PfPMRT1* knockout  
382 parasites. Additionally, we found that *PfPMRT1* is essential for early gametocytogenesis.  
383 Interestingly, the induction of the knockout at stage II–III had no effect on gametocytogenesis.  
384 This might be due to sufficient amounts of *PfPMRT1* already present at the PPM, but could  
385 also indicate that the function of the transporter is not required for later stage gametocyte  
386 maturation.

387 The *PfPMRT1*-WT-expressing *Xenopus* oocytes showed a hyperpolarization-activated ion  
388 transport activity, which is reduced in the variant featuring mutations in the first loop that  
389 extends into the parasitophorous vacuole. But it remains to be determined whether the  
390 hyperpolarization-activated ion transporting activity is the main physiological function of  
391 *PfPMRT1*. Additional functions such as transporting of other molecules, or cooperative  
392 interaction with other parasite proteins might play a role under physiological conditions.  
393 However, the mutation analysis suggested that the negatively charged amino acids of the first  
394 loop protruding into the PV lumen are important for the function of *PfPMRT1*. Interestingly,  
395 AlphaFold predicts smaller helical structures within this negatively charged loop, which  
396 possibly function as flexible gates and/or could be involved substrate binding.

397 For future work, further functional and pharmacological characterization of this transporter will  
398 provide insights into its biological role in different stages of the parasites life cycle, as  
399 transcriptomic data indicates – along with expression in blood stages (31, 32) – *PfPMRT1* is  
400 expressed in oocysts of *P. falciparum* (54, 71) and *P. berghei* (72).

401

## 402 **Material and methods**

### 403 **Cloning of plasmid constructs for parasite transfection**

404 For endogenous tagging using the SLI system (37) a 889 bp (for *PfPMRT1*; PF3D7\_1135300),  
405 905 bp (*PfFVRT1*; PF3D7\_0523800), 827bp (*PfZIP1*; PF3D7\_0609100), 873 bp (*PfDMT2*;  
406 PF3D7\_0716900), 877 bp (*PfMFS6*; PF3D7\_1440800), 785 bp (*PfCDF*; PF3D7\_0715900)  
407 long homology region (HR) was amplified using 3D7 gDNA and cloned into pSLI-GFP-glmS  
408 (73) (derived from pSLI-GFP (37)) using the NotI/MluI restriction site. In order to generate

409 *PfPMRT1*-2xFKBP-GFP a 1000 bp long HR was amplified using 3D7 gDNA and cloned into  
410 pSLI-2xFKBP-GFP (37).

411 For SLI-based targeted gene disruption (SLI-TGD) (37) a 501 bp (*PfPMRT1*), 378 bp  
412 (*PfFVRT1*), 511 bp (*PfZIP1*), 399 bp (*PfDMT2*), 396 bp (*PfMFS6*), 741 bp (*PfCDF*) long  
413 homology region was amplified using 3D7 gDNA and cloned into the pSLI-TGD plasmid (37)  
414 using NotI and MluI restriction sites.

415 For conditional deletion of *PfPMRT1*, the first 492 bp of the *PfPMRT1* gene were PCR amplified  
416 to append a first loxP site and a recodonized T2A skip peptide. The recodonized full-length  
417 coding region of *PfPMRT1* was synthesized (GenScript, Piscataway, NJ, USA) and PCR  
418 amplified with primers to add a second loxP site after the gene to obtain a second fragment.  
419 Both fragments were cloned into pSLI-3xHA (51), using NotI/SpeI and AvrII/XmaI sites. This  
420 resulted in plasmid pSLI-*PfPMRT1*-loxP and the resulting transgenic cell line after successful  
421 genomic modification was transfected with pSkip-Flox (37) using 2 µg/ml Blasticidin S to obtain  
422 a line expressing the DiCre fragments (cond $\Delta$ PMRT1).

423 For complementation constructs, the recodonized *PfPMRT1* gene was PCR amplified using  
424 primers to append the TY1 sequence and cloned via XhoI and AvrII or KpnI into pEXP1comp  
425 (51) containing yDHODH as a resistance marker and different promoters (*nmd3*  
426 (PF3D7\_0729300), *sf3a2* (PF3D7\_0619900)) driving expression of the expression cassette.  
427 This resulted in plasmids c-*nmdr**PfPMRT1*-ty1 and c-*sf3a2**PfPMRT1*-ty1.

428 *PfPMRT1* homologues of *P. vivax* (PVP01\_0936100) (74) and *P. knowlesi* (PKNH\_0933400)  
429 (75) were amplified from parasite gDNA and cloned into p<sup>*nmd3*</sup>EXP1comp (51) via the XhoI/AvrII  
430 restriction site. For co-localization experiments the plasmids pLyn-FRB-mCherry (37), P40PX-  
431 mCherry (40), pARL-<sup>*cr*</sup>ACP-mCherry (42), pARL-<sup>*ama1*</sup>ARO-mCherry (44) and pARL-<sup>*ama1*</sup>AMA1-  
432 mCherry (47) were used. For conditional gametocyte induction yDHODH was amplified by  
433 PCR from pARL-<sup>*ama1*</sup>AMA1-mCherry-yDHODH (47) and cloned into GDV1-GFP-DD-  
434 hDHFR(56)(56) using the XhoI/XhoI restriction site. For expression in *Xenopus* oocysts  
435 *PfPMRT1* was amplified from c-*nmdr**PfPMRT1*-ty1 and DNA fragments were ligated and  
436 inserted into the oocyte expression vector pGEM-HE (76), containing a C-terminal eYFP using  
437 the BamHI/XhoI restriction site. As a control of plasma membrane-targeted channel protein,  
438 the cyclic nucleotide-gated potassium channel SthK (77) was also cloned into the pGEM-  
439 HE vector with C-terminal eYFP using the BamHI/XhoI restriction site.

440 The pGEM-HE plasmids containing SthK, *PfPMRT1* or the mutant were linearized by NheI  
441 digestion before the RNA generation. Mutations were made by QuikChange Site-Directed  
442 Mutagenesis. The complementary RNA (cRNA) was synthesized by in vitro transcription using  
443 the AmpliCap-MaxT7 High Yield Message Maker Kit (Epicentre).

444 Sequences of the MutPC and MutPV variants were amplified from pGEM plasmid constructs  
445 and cloned into c-<sup>*nmd3*</sup>*PfPMRT1*-ty1 using the XhoI/AvrII restriction site.

446 Oligonucleotides and plasmids used in this study are listed in **Table S1A** and S1B.

#### 447 ***P. falciparum* culture and transfection**

448 Blood stages of *P. falciparum* 3D7 were cultured in human erythrocytes (O+). Cultures were  
449 maintained at 37°C in an atmosphere of 1% O<sub>2</sub>, 5% CO<sub>2</sub> and 94% N<sub>2</sub> using RPMI complete  
450 medium containing 0.5% Albumax according to standard protocols (78). To maintain  
451 synchronized parasites, cultures were treated with 5% sorbitol (79).

452 Induction of gametocytogenesis was done as previously described (55, 56). Briefly, GDV1-  
453 GFP-DD expression was achieved by addition of 4 µM shield-1 to the culture medium and  
454 gametocyte cultures were treated with 50 mM N-acetyl-D-glucosamine (GlcNAc) for five days  
455 starting 72 hours post shield-1 addition to eliminate asexual parasites(80). Alternatively,  
456 asexual ring stage cultures with >10% parasitemia were synchronized with Sorbitol (79)  
457 cultured for 24 hours and treated with 50 mM N-acetyl-D-glucosamine (GlcNAc) (80) for five  
458 days.

459 For transfection, Percoll-purified (81) late-schizont-stage parasites were transfected with 50  
460 µg of plasmid DNA using Amaxa Nucleofector 2b (Lonza, Switzerland) as previously  
461 described(82). Transfectants were selected either using 4 nM WR99210 (Jacobus  
462 Pharmaceuticals), 2 µg/ml Blasticidin S (Life Technologies, USA), or 0.9 µM DSM1 (83) (BEI  
463 Resources; <https://www.beiresources.org>). In order to select for parasites carrying the genomic  
464 modification using the SLI system (37), G418 (Sigma-Aldrich, St. Louis, MO) at a final  
465 concentration of 400 µg/ml was added to 5% parasitemia culture. The selection process and  
466 testing for integration were performed as previously described (37).

467 For SLI-TGD, a total of six (*P*PMRT1, *P*DMT2, *P*FZIP1, *P*ICDF) or eight (*P*FVRT1, *P*MFS6)  
468 independent 5 ml cultures containing the episomal plasmid were selected under G418 for at  
469 least eight weeks.

#### 470 **Imaging and immunofluorescence analysis (IFA)**

471 Images of *Xenopus* oocysts were taken 3 days after injection using a Carl Zeiss LSM 5  
472 Pascal Laser Scanning Confocal Microscope, with a 40x/0.8 water immersion objective. The  
473 eYFP fluorescence was excited at 514 nm of the Argon laser and obtained at 530 - 600 nm.

474 Fluorescence images of infected erythrocytes were observed and captured using a Zeiss  
475 Axioskop 2plus microscope with a Hamamatsu Digital camera (Model C4742-95), a Leica D6B  
476 fluorescence microscope equipped with a Leica DFC9000 GT camera and a Leica Plan  
477 Aplanachromat 100x/1.4 oil objective or an Olympus FV3000 with a x100 MPLAPON oil objective  
478 (NA 1.4).

479 Microscopy of unfixed IEs was performed as previously described (84). Briefly, parasites were  
480 incubated in RPMI1640 culture medium with Hoechst-33342 (Invitrogen) for 15 minutes at  
481 37°C prior to imaging. 7 µl of IEs were added on a glass slide and covered with a cover slip.

482 BODIPY TR C5 ceramide (Invitrogen) staining was performed by adding the dye to 32 hours  
483 post invasion parasites in a final concentration of 2.5  $\mu$ M in RPMI as previously described (84).  
484 For DHE staining of the parasite cytosol (40), 80  $\mu$ l of resuspended parasite culture were  
485 incubated with DHE at a final concentration of 4.5  $\mu$ g/ml in the dark for 15 minutes prior to  
486 imaging.

487 IFAs were performed as described previously (85). Briefly, IEs were smeared on slides and  
488 air-dried. Cells were fixed in 100% ice cold methanol for 3 minutes at -20°C. Afterwards, cells  
489 were blocked with 5% milk powder for 30 minutes. Next primary antibodies were diluted in  
490 PBS/3% milk powder and incubated for 2 hours, followed by three washing steps in PBS.  
491 Secondary antibodies were applied for 2 hours in PBS/3% milk powder containing 1  $\mu$ g/ml  
492 Hoechst-33342 (Invitrogen) or DAPI (Roche) for nuclei staining, followed by 3 washes with  
493 PBS. One drop of mounting medium (Mowiol 4-88 (Calbiochem)) was added and the slide  
494 sealed with a coverslip for imaging.

495 To assess the localisation of the endogenously HA-tagged *Pf*PMRT1 IFAs were performed in  
496 suspension with Compound 2-stalled schizonts (86) to distinguish protein located at the PPM  
497 from that located at the PVM as previously done (51, 87). For this, trophozoite stages were  
498 treated with Compound 2 (1  $\mu$ M) overnight, and arrested schizonts were harvested, washed in  
499 PBS, and fixed with 4% paraformaldehyde/0.0075% glutaraldehyde in PBS. Cells were  
500 permeabilized with 0.5% Triton X-100 in PBS, blocked with 3% BSA in PBS, and incubated  
501 overnight with primary antibodies diluted in 3% BSA in PBS. Cells were washed 3 times with  
502 PBS and incubated for 1 hour with Alexa 488 nm or Alexa 594 nm conjugated secondary  
503 antibodies specific for human and rat IgG (Invitrogen) diluted 1:2,000 in 3% BSA in PBS and  
504 containing 1  $\mu$ g/ml DAPI. Cells were directly imaged after washing 5 times with PBS

505 Antisera used: 1:200 mouse anti-GFP clones 7.1 and 13.1 (Roche), 1:500 rat anti-HA clone  
506 3F10 (Roche), 1:1000 human anti-MSP1 (88), 1:10000 mouse anti-TY1 (ThermoFischer  
507 Scientific Cat.No: MA5-23513). Contrast and intensities were linear adjusted if necessary and  
508 cropped images were assembled as panels using Fiji (89), Corel Photo-Paint X6 and Adobe  
509 Photoshop CC 2021.

## 510 Immunoblots

511 Immunoblots were performed using saponin lysed infected erythrocytes. Parasite proteins  
512 were separated on a 10% SDS-PAGE gel using standard procedures and transferred to a  
513 nitrocellulose membrane (Amersham™Protran™ 0.45  $\mu$ m NC, GE Healthcare) using a  
514 transblot device (Bio-Rad) according to manufacturer's instructions.

515 Rabbit anti-aldolase (90) and anti-sbp1 (90) antibodies were diluted 1:2,000, mouse anti-GFP  
516 clones 7.1 and 13.1 (Roche) antibody was diluted 1:500 or 1:1,000 and rat anti-HA clone 3F10  
517 (Roche) antibody was diluted 1:1,000.

518 The chemiluminescent signal of the HRP-coupled secondary antibodies (Dianova) was  
519 visualized using a Chemi Doc XRS imaging system (Bio-Rad) and processed with Image Lab  
520 Software 5.2 (Bio-Rad). To perform loading controls and ensure equal loading of parasite  
521 material anti-aldolase antibodies were used. The corresponding immunoblots were incubated  
522 two times in stripping buffer (0.2 M glycine, 50 mM DTT, 0.05% Tween 20) at 55°C for 1 hour  
523 and washed 3 times with TBS for 10 minutes.

#### 524 **Growth Assay**

525 A flow cytometry-based assay adapted from previously published assays (40, 91) was  
526 performed. For this, parasite cultures were resuspended and 20 µl samples were transferred  
527 to an Eppendorf tube. 80 µl RPMI containing Hoechst-33342 and dihydroethidium (DHE) was  
528 added to obtain final concentrations of 5 µg/ml and 4.5 µg/ml, respectively. Samples were  
529 incubated for 20 minutes (protected from UV light) at room temperature, and parasitemia was  
530 determined using an LSRII flow cytometer by counting 100,000 events using the FACSDiva  
531 software (BD Biosciences) or using an ACEA NovoCyte flow cytometer.

#### 532 **Stage distribution assay**

533 In order to obtain tightly synchronized parasite cultures, percoll purified schizonts(81) were  
534 cultured for four hours together with fresh erythrocytes, followed by sorbitol synchronization  
535 and resulting in a four-hour age window of parasites. Next, the culture was divided in four  
536 dishes and rapalog was added at a final concentration of 250 nM immediately to one dish and  
537 at 20 hours post invasion (hpi) and 32 hpi to the respective dishes. Giemsa smears and  
538 samples for flow cytometry were collected at the indicated timepoints. The parasitemia was  
539 determined using a flow cytometry assay and the stages were determined microscopically  
540 counting at least 50 infected erythrocytes per sample and timepoint.

#### 541 **Gametocyte stage distribution assay**

542 Giemsa-stained blood smears 10 days post induction of GDV1 expression were obtained and  
543 at least 10 fields of view were recorded using a 63x objective per treatment and time point.  
544 Erythrocyte numbers were then determined using the automated Parasitemia software  
545 (<http://www.gburri.org/parasitemia/>) while the number of gametocytes, pycnotic and asexual  
546 parasites was determined manually in >1800 erythrocytes per sample. This assay was done  
547 blinded.

#### 548 **GlmS-based knockdown**

549 GlmS based knockdown assay was adapted from previously published assays (38, 73). To  
550 induce knockdown 2.5 or 5 mM glucosamine was added to highly synchronous early rings  
551 stage parasites. As a control, the same amount of glucosamine was also added to 3D7 wildtype

552 parasites. For all analyses, the growth medium was changed daily, and fresh glucosamine  
553 were added every day.

554 Knockdown was quantified by fluorescence live cell microscopy at day 1 and 3 of the growth  
555 assay. Parasites with similar size were imaged, and fluorescence was captured with the same  
556 acquisition settings to obtain comparable measurements of the fluorescence intensity.  
557 Fluorescence intensity (integrated density) was measured with Fiji(89), and background was  
558 subtracted in each image. The data were analyzed with Graph Pad Prism version 8.

559 GImS based knockdown experiments in gametocytes were performed as described previously  
560 (92). Briefly, synchronized ring stage cultures were induced by the addition of shield-1. At day  
561 3 post induction the culture was spilt into two dishes and one dish was cultured in the presence  
562 of 2.5 mM glucosamine for the remaining ten days. Knockdown was quantified by fluorescence  
563 live cell microscopy at day 7 and 10 post induction, as described above and gametocyte  
564 parasitemia was determined at day 10 post induction using the automated Parasitemia  
565 software (<http://www.gburri.org/parasitemia/>).

#### 566 **DiCre mediated conditional knockout**

567 The parasites containing the integrated pSLI-*Pf*PMRT1-loxP construct were transfected with  
568 pSkip-Flox (37) using 2 µg/ml Blasticidin S to obtain a line expressing the DiCre fragments. To  
569 induce excision, the tightly synchronized parasites (detailed description see growth assay)  
570 were split into 2 dishes and rapalog was added to one dish (Clontech, Mountain View, CA) to  
571 a final concentration of 250 nM. The untreated dish served as control culture. Excision was  
572 verified at genomic level after 24 and 48 hours of cultivation by PCR and on protein level by  
573 Western blot using anti-HA antibodies.

#### 574 **Phylogenetic analysis**

575 A blastp search of the PMRT1 sequence (PlasmoDB (60): PF3D7\_1135300; UniProt: Q8II12)  
576 was performed against the nr database (9 May 2021) using Geneious Prime 2021.2.2  
577 (<https://www.geneious.com>) and an E-value of 10e-0 (BLOSUM62 substitution matrix). Blast  
578 hits were filtered for sequences from taxa represented in the currently favored haemosporidian  
579 parasite phylogeny (93). The phylogeny derived from an amino acid alignment using Bayesian  
580 framework with a partitioned supermatrix and a relaxed molecular clock  
581 (18\_amino\_acid\_partitioned\_BEAST\_relaxed\_clock\_no\_outgroup.tre; (93)) was visualized  
582 with associated data using the R package ggtree v3.3.0.900 (94, 95). A multiple protein  
583 sequence alignment of PMRT1 and homologous sequences was performed using MAFFT  
584 v7.490 (96) using the G-INS-I algorithm to obtain a highly accurate alignment. Protein statistics  
585 were calculated using Geneious Prime 2021.2.2 (<https://www.geneious.com>) and EMBOSS  
586 pepstats v6.6.0.0 (97).

#### 587 **Prediction of protein structures**



588 AlphaFold structure predictions (35) were retrieved from <https://alphafold.ebi.ac.uk> and the  
589 PDB used for DALI protein structure homology search (36). PyMOL Molecular Graphics  
590 System, Version 2.5.2 Schrödinger was used for visualization of all structures, generation of  
591 figures and the calculation of the root mean square deviation (RMSD) between the predicted  
592 crystal structure of *PfPMRT1* and the Maquette-3 protein (PDB: 5vjt (57)) by cealign. The  
593 Adaptive Poisson-Boltzmann Solver (APBS) within PyMOL was used to predict the surface  
594 electrostatics of *PfPMRT1*.

### 595 **Electrophysiology experiments**

596 Stage V and VI oocytes were surgically removed from female *Xenopus laevis* by immersion in  
597 water containing 1 g/L Tricain and isolated from theca and follicle layers by digestion with 0.14  
598 mg ml<sup>-1</sup> collagenase I. Oocytes were injected with 20 ng cRNA and were incubated at 16°C for  
599 3 days in ND96 solution (96 mM NaCl, 2 mM KCl, 1 mM CaCl<sub>2</sub>, 1 mM MgCl<sub>2</sub>, 10 mM HEPES,  
600 pH7.4). Electrophysiological measurements with *Xenopus* oocytes were performed at room  
601 temperature (20–23°C) with a two-electrode voltage clamp amplifier (TURBO TEC-03X, npi  
602 electronic GmbH, Tamm, Germany). The bath solutions for electrophysiological recording are  
603 indicated in each figure legend. Electrode capillaries ( $\Phi=1.5$  99 mm, Wall thickness 0.178 mm,  
604 Hilgenberg) were filled with 3 M KCl, with tip openings of 0.4–1 M $\Omega$ . USB-6221 DAQ device  
605 (National Instruments) and WinWCP (v5.5.3, Strathclyde University, UK) are used for data  
606 acquisition. Origin2020 Pro and the R software environment (98) were used for data analysis.  
607 Data was visualized in R using ggplot2 (99) and patchwork (100).

608

609 Parasite icons were generated using BioRender (biorender.com) and statistical analysis was  
610 performed using GraphPad Prism version 8 (GraphPad Software, USA).

611

### 612 **Acknowledgements**

613 We thank Michael Filarsky for providing the pHcamGDV1-GFP-DD\_hDHFR plasmid, Egbert  
614 Tannich for providing *P. vivax* and *P. knowlesi* gDNA, Mike Blackman for the anti-MSP1  
615 antibody, Jacobus Pharmaceuticals for WR99210, Greg Burri for the parasitemia software and  
616 the Advanced Light and Fluorescence Microscopy (ALFM) facility at the Centre for Structural  
617 Systems Biology (CSSB), in particular Roland Thuenauer, for support with light microscopy  
618 image recording and analysis. DSM1 (MRA-1161) was obtained from MR4/BEI Resources,  
619 NIAID, NIH. Furthermore, we thank Maria Rosenthal for her help with the visualization of the  
620 predicted protein structures.

### 621 **Funding**

622 AB and JSW were funded by the German Research Foundation (DFG) grant BA 5213/3-1.  
623 Partnership of Universität Hamburg and DESY (PIER) project ID PIF-2018-87 (JSTR, CL,

624 TWG), CSSB Seed grant KIF 2019/002 (TWG), Hospital Research Foundation Fellowship  
625 (DW), DAAD/Universities Australia joint research co-operation scheme (TWG, DW, BL). IH  
626 and BL were supported by Australian Government Research Training Stipend. JY, SG and GN  
627 were funded by DFG Projektnummer 374031971 TRR 240 A04 and 417451587. JSTÄ thanks  
628 the Jürgen Manchot Stiftung for funding and PMR, TS acknowledge funding by the DFG  
629 (SP1209/4-1)

### 630 **Author contribution**

631 Conceptualization: JSW, TWG, AB, JSTR

632 Methodology: GN, SG

633 Investigation: JSW, PMR, JY, GF; JSTÄ, HVT, AA, IH, BL

634 Formal Analysis: JSTR

635 Writing original manuscript: JSW, AB, JSTR, DW

636 Review & Editing: JSW, TWG, AB, JSTR, DW

637 Funding Acquisition: DW, CL, TWG, AB, JSTR

638 Resources: TWG

639 Project Administration: TWG, AB, JSTR

640 Supervision: DW, TS, SG, TWG, AB

641 All authors read and approved the manuscript.

642

### 643 **Figures**

644 **Figure 1: Subcellular localization of six putative *P. falciparum* transporters during**  
645 **asexual blood stage development.**

646 **(A)** Schematic representation of endogenous tagging strategy using the selection-linked  
647 integration system (SLI). pink, human dihydrofolate dehydrogenase (hDHFR); grey, homology  
648 region (HR); green, green fluorescence protein (GFP) tag; dark grey, T2A skip peptide; blue,  
649 neomycin resistance cassette; orange, glmS cassette. Stars indicate stop codons, and arrows  
650 depict primers (P1 to P4) used for the integration check PCR. **(B–G)** Localization of (B)  
651 *PfFVRT1*-GFP-glmS, (C) *PfZIP1*-GFP-glmS, (D) *PfCDF*-GFP-glmS, (E) *PfDMT2*-GFP-glmS,  
652 (F) *PfMFS6*-GFP-glmS and (G) *PfPMRT1*-GFP-glmS by live-cell microscopy in ring,  
653 trophozoite and schizont stage parasites. Nuclei were stained with Hoechst-33342. **(H)** Co-  
654 localization of the GFP-tagged putative transporters with marker proteins P40PX-mCherry  
655 (food vacuole), ACP-mCherry (apicoplast), Lyn-mCherry (parasite plasma membrane), ARO-  
656 mCherry (rhoptry) and AMA1-mCherry (microneme) as indicated. Nuclei were stained with  
657 Hoechst- 33342. Scale bar, 2 µm.

658

659 **Figure 2: Conditional knockdown of putative transporter indicate importance of *PfDMT2***  
660 **and *PfPMRT1* for parasites fitness.**

661 **(A–C)** Live cell microscopy and quantification of knockdown by measuring mean fluorescence  
662 intensity (MFI) density and size (area) of (A) *PfDMT2*-GFP-glmS (B) *PfMFS6*-GFP-glmS and  
663 (C) *PfPMRT1*-GFP-glmS parasites 40 hours after treatment without (control) or with 2.5 mM  
664 glucosamine. Scale bar, 2  $\mu$ m. Statistics are displayed as mean  $\pm$  SD of three (A–B) or four  
665 (C) independent experiments and individual data points are color-coded by experiments  
666 according to Superplots guidelines (101). P-values displayed were determined with two-tailed  
667 unpaired t-test. **(D)** Growth of parasites treated without (control) or with 2.5 mM glucosamine  
668 determined by flow cytometry is shown as relative parasitemia values after two cycles. Shown  
669 are means  $\pm$  SD of three (*PfPMRT1*-GFP-glmS, *PfDMT2*-GFP-glmS, *PfMFS6*-GFP-glmS)  
670 and five (3D7 wild type parasites) independent growth experiments. P-values displayed were  
671 determined with unpaired t test with Welch correction and Benjamin Hochberg for multiple  
672 testing correction. Individual growth curves are shown in **Figure S4G**. **(E)** Growth of *PfPMRT1*-  
673 glmS and 3D7 parasites after treatment with 2.5 mM (left panel) or 5 mM glucosamine (right  
674 panel) compared to untreated control parasites over five consecutive days. **(F)** Mean  $\pm$  SD  
675 distribution of ring and schizont stage parasites in *PfPMRT1*-glmS and 3D7 cell lines treated  
676 without (control), with 2.5 mM or 5 mM glucosamine at 80 hours post addition of glucosamine  
677 of three independent experiments.

678

679 **Figure 3: *PfPMRT1* is essential for asexual blood stage development.**

680 **(A)** Simplified schematic of DiCre-based conditional *PfPMRT1* knockout using selection-linked  
681 integration (SLI). Pink, human dihydrofolate dehydrogenase (hDHFR); grey, homology region  
682 (HR); green, T2A skip peptide; light blue, recodonized *PfPMRT1*; dark blue, 3xHA tag, yellow,  
683 neomycin phosphotransferase resistance cassette; orange, loxp sequence. Scissors indicate  
684 DiCre mediated excision sites upon addition of rapalog. Stars indicate stop codons, and arrows  
685 depict primers (P1 to P5) used for the integration check PCR and excision PCR. **(B)** Diagnostic  
686 PCR of unmodified wildtype and transgenic cond $\Delta$ PMRT1 knock-in (KI) cell line to check for  
687 genomic integration using Primer P1-P4 as indicated in (A). **(C)** Immunofluorescence assay  
688 (IFA) of cond $\Delta$ PMRT1 late stage schizont parasites showing localization of *PfPMRT1*-3xHA at  
689 the parasite plasma membrane (PPM) co-localizing with the merozoite surface protein 1  
690 (MSP1). **(D)** Diagnostic PCR to verify the excision at genomic level at 24 hpi / 20 hours post  
691 rapalog addition for cond $\Delta$ PMRT1 and at 48 hpi for cond $\Delta$ PMRT1, c-<sup>nmd3</sup>*PfPMRT1*-ty1 and c-  
692 <sup>sf3a2</sup>*PfPMRT1*-ty1 parasites using Primer P1-P5 as indicated in (A). Black arrow head, original  
693 locus; red arrow head, excised locus. **(E)** Western blot using  $\alpha$ -HA to verify knockout of  
694 *PfPMRT1* on protein level 4, 24 and 48 hours post invasion. Expected molecular weight of  
695 *PfPMRT1*-3xHA: 53.3 kDa. Antibodies detecting Aldolase and SBP1 were used as loading

696 controls. **(F)** Growth curves of  $\text{cond}\Delta\text{PMRT1}$ ,  $c\text{-}^{\text{nmd3}}P\text{fPMRT1-ty1}$  and  $c\text{-}^{\text{sf3a2}}P\text{fPMRT1-ty1}$   
697 parasites +/- rapalog monitored over five days by flow cytometry. One representative growth  
698 curve is depicted (replicates in **Figure S5**). Summary is shown as relative parasitemia values,  
699 which were obtained by dividing the parasitemia of rapalog treated cultures by the parasitemia  
700 of the corresponding untreated ones. Shown are means +/- SD of three ( $\text{cond}\Delta\text{PMRT1}$ ,  $c\text{-}$   
701  $^{\text{nmd3}}P\text{fPMRT1-ty1}$ ) or four ( $c\text{-}^{\text{sf3a2}}P\text{fPMRT1-ty1}$ ) independent growth experiments. **(G)** IFA of  
702  $\text{cond}\Delta\text{PMRT1}$  complemented with C-terminal TY1-tagged  $P\text{fPMRT1}$  constructs expressed  
703 either under the constitutive  $\text{nmd3}$  or the weak  $\text{sf3a2}$  promoter to verify PPM localization. Scale  
704 bar, 2  $\mu\text{m}$ .  
705

706 **Figure 4: Knockout of  $P\text{fPMRT1}$  results in accumulation of PPM-derived vacuoles and**  
707 **growth arrest at the trophozoite stage.**

708 **(A)** Parasite stage distribution in Giemsa smears displayed as heatmap showing percentage  
709 of parasite stages for tightly synchronized (+/- 2 h) 3D7 control and  $\text{cond}\Delta\text{PMRT1}$  (rapalog  
710 treated at 4 hpi, 20 hpi or 32 hpi) parasite cultures over two consecutive cycles. A second  
711 replicate is shown in **Figure S6A** **(B)** Giemsa smears of control and at 4 hpi rapalog treated  
712  $\text{cond}\Delta\text{PMRT1}$  parasites over two cycles. Scale bar, 5  $\mu\text{m}$ . **(C)** Live cell microscopy of 4 hour  
713 window synchronized 3D7 control and  $\text{cond}\Delta\text{PMRT1}$  parasites +/- rapalog stained with  
714 dihydroethidium (DHE) at 20–32 hpi. **(D)** Quantification of parasites displaying vacuoles  
715 (green) for 4 hour window synchronized 3D7 control and rapalog treated  $\text{cond}\Delta\text{PMRT1}$   
716 parasites. Shown are percentages of normal parasites versus parasites displaying vacuoles  
717 as means +/- SD of three independent experiments. **(E)** Live cell microscopy of 8 hour window  
718 synchronized 3D7 control and rapalog treated  $\text{cond}\Delta\text{PMRT1}$  parasites, episomally expressing  
719 the PPM marker Lyn-mCherry at 24–40 hpi. **(F)** Live cell microscopy of 3D7 control and  
720  $\text{cond}\Delta\text{PMRT1}$  parasites +/- rapalog stained with BODIPY TR C5 ceramide at 32 hpi. Scale bar,  
721 2  $\mu\text{m}$ .  
722

723 **Figure 5:  $P\text{fPMRT1}$  is essential for early gametocyte development.**

724 **(A)** Live cell microscopy of 3D7-iGP- $P\text{fPMRT1}$ -GFP parasites across the complete gametocyte  
725 development. White arrow heads indicate remaining GDV1-GFP signal observed in close  
726 proximity to the Hoechst signal, as previously reported (56, 92, 102, 103). **(B)** Live cell  
727 microscopy of  $P\text{fPMRT1}$ -GFP parasites expressing the PPM marker Lyn-mCherry. Nuclei  
728 were stained with Hoechst-33342. Scale bar, 2  $\mu\text{m}$ . **(C)** Experimental setup of gametocyte  
729 induction upon GDV1-GFP-DD expression (+shield-1) and conditional  $P\text{fPMRT1}$  knockout  
730 (+rapalog) and elimination of asexual blood stage parasites (+GlcNac). **(D)** Gametocyte  
731 development over 12 days of  $\text{cond}\Delta\text{PMRT1}/\text{GDV1-GFP-DD}$  parasites without (control) or with

732 rapalog addition at day 3 (3 dpi) or day 5 (5 dpi) after induction of sexual commitment by  
733 conditional expression of GDV1-GFP upon addition of shield-1. Scale bar, 5  $\mu$ m. **(E)** Diagnostic  
734 PCR to verify the excision on genomic level at 5 dpi and 12 dpi. Black arrow head, original  
735 locus; red arrow head, excised locus. **(F)** Representative Giemsa smears and quantification of  
736 parasite stage distribution at day 10 post induction for parasites treated without (control) or  
737 with rapalog at day 3 post induction. For each condition parasitemia and parasite stages  
738 distribution in ( $n_{\text{control}} = 3370, 2304, 2759$  and  $n_{\text{rapalog}} = 3010, 1830, 2387$ ) erythrocytes were  
739 determined and are displayed as percentage (gametocyte parasitemia for control (1.3%, 0.4%,  
740 1.1%) and for rapalog treated (0%, 0%, 0%). Nuclei were stained with Hoechst-33342. Scale  
741 bar, 10  $\mu$ m.  
742

743 **Figure 6: PMRT1 is a genus-specific transporter with conserved function.**

744 **(A)** Phylogenetic tree of haemosporidian parasites (modified from (93)) containing PMRT1  
745 homologous sequences associated with data on pairwise amino acid sequence identity to  
746 *Pf*PMRT1. The phylogeny is derived from Bayesian Inference using BEAST using a fully  
747 partitioned amino acid dataset and lognormal relaxed molecular clock (93). Silhouettes depict  
748 representatives of the vertebrate hosts for each lineage and white filled bars indicate pairwise  
749 identities of PMRT1 homologs used for subsequent complementation assays. **(B)** Structural  
750 alignment of predicted *Pf*PMRT1 structure with Maquette-3 protein (PDB: 5vjt) (57). Both  
751 structures have a root mean square deviation (RMSD) over the aligned  $\alpha$ -carbon position of  
752 3.12 over 184 residues calculated in PyMol. **(C)** IFA of *c-nmd3Pk-ty1* and *c-nmd3Pv-ty1* parasites  
753 to verify correct localization of the expressed complementation fusion proteins at the parasite  
754 plasma membrane. Nuclei were stained with Hoechst-33342. Scale bar, 2  $\mu$ m. **(D)** Growth of  
755  $\Delta$ PMRT1 parasites complemented with *Pf*PMRT1 homologs from *P. vivax*  
756 (PVP01\_0936100) and *P. knowlesi* (PKNH\_0933400). Shown are relative parasitemia values,  
757 which were obtained by dividing the parasitemia of rapalog treated cultures by the parasitemia  
758 of the corresponding untreated controls together with means  $\pm$  SD from three *c-nmd3Pf-ty1* ( $\cong$   
759 *c-nmd3PfPMRT1-ty1* Figure 3D, S5B) and six (*c-nmd3Pk-ty1*, *c-nmd3Pv-ty1*) independent growth  
760 experiments. One sample t-test **(E)** Diagnostic PCR to verify the excision of *Pf*PMRT1 on  
761 genomic level at 48 hpi for *c-nmd3Pf-ty1*, *c-nmd3Pk-ty1* and *c-nmd3Pv-ty1* parasites. Black arrow  
762 head, original locus; red arrow head, excised locus.  
763

764 **Figure 7: In vitro characterization of PfPMRT1 in Xenopus oocytes.**

765 **(A)** Surface electrostatics of the predicted *Pf*PMRT1 structure generated by APBS within  
766 PyMol. **(B)** Scheme of *Pf*PMRT1 membrane topology prediction and the two mutation sites:  
767 Outer loop mutant (MutPV) between TM 1 – 2 with negative charged amino acids (indicated in

768 red) and inner loop mutant (MutPC) between TM 4 – 5 with positive charged amino acids  
769 (indicated in blue) were changed to neutral amino acids. The cartoon was generated by  
770 Protter(104) and PyMol. **(C)** Confocal images of a non-injected oocyte, *PfPMRT1*, MutPV and  
771 MutPC expressing oocytes. Scale bar, 100  $\mu$ m. **(D)** Superimposed traces of control (injected  
772 with a cyclic nucleotide-gated potassium channel SthK(77)), *PfPMRT1*, MutPV and MutPC  
773 expressing oocytes with the protocol shown in the upper left. The grey traces are original  
774 recordings from 7 to 10 oocytes, averaged traces are shown in black. Bath solution contains  
775 (in mM): 120 NMG Cl, 1 MgCl<sub>2</sub>, 2 CaCl<sub>2</sub>, 10 HEPES, pH7.6. **(E)** Current–voltage (I–V) curves  
776 of data points from (D) taken at the end of each holding potential. Both, MutPV and the SthK-  
777 control are significantly different from wild type *PfPMRT1* with P values of 0.017 and 0.014,  
778 respectively (Mean  $\pm$  SD, n = 7 - 10). **(F)** Diagnostic PCR to verify the excision on genomic  
779 level at 48 hours post rapalog addition in *cond $\Delta$ PMRT1*, *c<sup>-nmd3</sup>MutPC-ty1* and *c<sup>-nmd3</sup>MutPV-ty1*  
780 parasites +/- rapalog. Black arrow head, original locus; red arrow head, excised locus. **(G)**  
781 Parasite growth shown as relative parasitemia values, which were obtained by dividing the  
782 parasitemia of rapalog treated cultures by the parasitemia of the corresponding untreated  
783 controls. Shown are means +/- SD of four (*c<sup>-sf3a2</sup>ty1*), three (*c<sup>-nmd3</sup>ty1*, *c<sup>-nmd3</sup>MutPC-ty1*), or six  
784 (*c<sup>-nmd</sup>-MutPV-ty1*) independent growth experiments. One sample t-test was used to test for  
785 statistical differences between complemented cell lines and plus and minus rapalog treatment.  
786

### 787 **Figure S1: Structure predictions and structure homology search of candidate proteins**

788 **(A)** AlphaFold structure predictions of the six selected orphan transporters visualized in PyMol.  
789 **(B)** Results from protein structure comparison server Dali using the AlphaFold-generated PDB  
790 files of the selected transporters as input structure. Shown are the top five non-redundant hits  
791 with Z score (significance estimate), msd (difference between the root-mean-square-deviation  
792 (rmsd) value associated with a protein structure pair and the rmsd value that would have been  
793 observed in the case that the two structures had the same crystallographic resolution), lali  
794 (number of aligned positions), nres (number of residues in the matched structure) and %id (the  
795 percentage sequence identity in the match).  
796

### 797 **Figure S2: Validation of generated transgenic cell lines by PCR and Western blot.**

798 **(A)** Confirmatory PCR of unmodified wildtype (WT) and transgenic knock-in (KI) cell lines  
799 (PF3D7\_0523800-GFP-glmS (*PfFVRT1*), PF3D7\_0609100-GFP-glmS (*PfZIP1*),  
800 PF3D7\_0715900-GFP-glmS (*PfCDF*), PF3D7\_0716900-GFP-glmS (*PfDMT2*),  
801 PF3D7\_1440800-GFP-glmS (*PfMFS6*) and PF3D7\_1135300-GFP-glmS (*PfPMRT1*)) to check  
802 for genomic integration at the 3'- and 5'-end of the locus. Position of the primer used are  
803 indicated with numbered arrows in [Figure 1A](#). **(B)** Western Blot analysis of wildtype (3D7) and

804 knock-in (KI) cell lines using mouse anti-GFP to detect the tagged full-length protein (upper  
805 panel) and rabbit anti-aldolase to control for equal loading (lower panel). Protein size is  
806 indicated in kDa. Expected molecular weight for GFP fusion proteins: *PfFVRT1* (107.5 kDa),  
807 *PfZIP1* (69.0 kDa), *PfDMT2* (66.4 kDa), *PfMFS6* (98.8 kDa), *PfPMRT1* (77.5 kDa), *PfCDF*  
808 (91.6 kDa) **(C)** Localization of *PfCDF*-3xHA by IFA in ring, trophozoite and schizont parasites.  
809 Nuclei were stained with Hoechst. Diagnostic PCR of unmodified wildtype (WT) and transgenic  
810 knock-in (KI) cell line. **(D)** Localization of *PfPMRT1*\_2xFKBP-GFP across the IDC. Nuclei were  
811 stained with DAPI. Scale bar, 2  $\mu$ m. Diagnostic PCR of unmodified wildtype (WT) and  
812 transgenic knock-in (KI) cell line. (E) Localization of *PfZIP1*-GFP in merozoites. Nuclei were  
813 stained with DAPI. Scale bar, 2  $\mu$ m.  
814

### 815 **Figure S3: Targeted gene disruption (TGD) of *PfZIP1* and *PfCDF*.**

816 **A)** Schematic representation of TGD strategy using the selection-linked integration system  
817 (SLI). pink, human dihydrofolate dehydrogenase (hDHFR); grey, homology region (HR); green,  
818 green fluorescence protein (GFP) tag; dark grey, T2A skip peptide; blue, neomycin resistance  
819 cassette. Stars indicate stop codons, and arrows depict primers (P1 to P4) used for the  
820 integration check PCR. **(B)** Localization of *PfZIP1*-TGD-GFP in ring, trophozoite and schizont  
821 parasites. Nuclei were stained with Hoechst-33342. Scale bar, 2  $\mu$ m. Confirmatory PCR of  
822 unmodified wildtype (WT) and transgenic targeted gene disruption (TGD) cell line. Growth  
823 curves of *PfZIP1*-TGD vs. 3D7 parasites monitored over five days by FACS. Three  
824 independent growth experiments were performed and a summary is shown as percentage of  
825 growth compared to 3D7 parasites. **(C)** Localization of *PfCDF*-TGD in ring, trophozoite and  
826 schizont parasites. Nuclei were stained with DAPI. Confirmatory PCR of unmodified wildtype  
827 (WT) and transgenic targeted gene disruption (TGD) cell line. Scale bar, 1  $\mu$ m.  
828

### 829 **Figure S4: Conditional knockdown via glmS system.**

830 Live cell microscopy of **(A)** *PfFVRT1*-GFP-glmS, **(B)** *PfCDF*-GFP-glmS, **(C)** *PfZIP1*-GFP-glmS  
831 **(D)** *PfDMT2*-GFP-glmS, **(E)** *PfMFS6*-GFP-glmS and **(F)** *PfPMRT1*-GFP-glmS parasites 40  
832 hours after treatment without (control) or with 2.5 mM Glucosamine. Nuclei were stained with  
833 Hoechst-33342. Scale bar, 2  $\mu$ m. **(G)** Individual growth curves of the growth assays shown in  
834 [Figure 2D](#).  
835

### 836 **Figure S5: Conditional knockout of *PfPMRT1* via DiCre-based system**

837 Replicates of growth curves of *cond $\Delta$ PMRT1*, *c<sup>-nmd3</sup>PfPMRT1-ty1* and *c<sup>-sf3a2</sup>PfPMRT1-ty1*  
838 parasites +/- rapalog monitored over five days by FACS shown in [Figure 3](#).  
839

840 **Figure S6: Conditional knockout of *PfPMRT1***

841 **(A)** Parasite stage distribution in Giemsa smears displayed as heatmap showing percentage  
842 of stages for control, 4 hpi, 20 hpi or 32 hpi rapalog treated 4 hour window synchronized  
843 cond $\Delta$ PMRT1 parasite cultures over one cycle. **(B)** Giemsa smears of control and 4 hpi, 20 hpi  
844 or 32 hpi rapalog treated parasites at 4, 16, 20, 24, 32, 40 and 48 hpi. Scale bar, 5  $\mu$ m.  
845

846 **Figure S7: Conditional knockdown of *PfPMRT1* has no effect during gametocyte**  
847 **development.**

848 **(A)** Confirmatory PCR of unmodified wildtype (WT) and transgenic 3D7-iGP-*PfPMRT1*-GFP-  
849 glmS to check for genomic integration at the 3'- and 5'-end of the locus. Position of the primer  
850 used are indicated with numbered arrows in **Figure 1A**. **(B)** Schematic representation of the  
851 experimental setup. **(C)** Live cell microscopy of 3D7-iGP-*PfPMRT1*-GFP stage I – V  
852 gametocytes. Scale bar, 2  $\mu$ m. **(D)** Giemsa smears of stage I – V gametocytes cultured either  
853 without (control) or with 2.5 mM glucosamine. Scale bar, 5  $\mu$ m. **(E)** Quantification of knockdown  
854 by measuring mean fluorescence intensity (MFI) density and size (area) of parasites at day 7  
855 and day 12 post induction of gametocytogenesis cultured either without (control) or with 2.5  
856 mM glucosamine. Scale bar, 2  $\mu$ m. Statistics are displayed as mean +/- SD of four independent  
857 experiments and individual data points are displayed as scatterplot color-coded by  
858 experiments according to Superplots guidelines(101)(101). P-values displayed were  
859 determined with two-tailed unpaired t-test. **(F)** For each condition gametocytemia at day 10  
860 post gametocyte induction was determined by counting between 1256-2653 (mean 2147) cells  
861 per condition in Giemsa-stained thin blood smears. Displayed are means +/- SD of  
862 independent growth experiments with the number of experiments (n) indicated. P-values  
863 displayed were determined with two-tailed unpaired t-test.  
864

865 **Figure S8:** Individual growth curves of c-*nmd3*Pk-ty1 (A) and c-*nmd3*Pv-ty1 (B) parasites +/-  
866 rapalog monitored over two IDCs by FACS shown in **Figure 6**.  
867

868 **Figure S9:** Individual growth curves of c-*nmd3*MutIn-ty1 (A) and c-*nmd3*MutOut-ty1 (B) parasites  
869 +/- rapalog monitored over two IDCs by FACS shown in **Figure 7**. **(C)** IFA of c-*nmd3*MutPC-ty1  
870 and c-*nmd3*MutPV-ty1 parasites to verify correct localization at the parasite plasma membrane.  
871 Nuclei were stained with Hoechst-33342. Scale bar, 2  $\mu$ m.  
872

873 **Table S1: Oligonucleotides and plasmids used in this study**

874



## 875 References

- 876 1. Martin RE, Henry RI, Abbey JL, Clements JD, Kirk K. 2005. The “permeome” of the  
877 malaria parasite: an overview of the membrane transport proteins of *Plasmodium*  
878 *falciparum*. *Genome Biol* 6:R26.
- 879 2. Martin RE. 2020. The transportome of the malaria parasite. *Biol Rev Camb Philos Soc*  
880 95:305–332.
- 881 3. Gardner MJ, Hall N, Fung E, White O, Berriman M, Hyman RW, Carlton JM, Pain A,  
882 Nelson KE, Bowman S, Paulsen IT, James K, Eisen JA, Rutherford K, Salzberg SL,  
883 Craig A, Kyes S, Chan M-S, Nene V, Shallom SJ, Suh B, Peterson J, Angiuoli S, Pertea  
884 M, Allen J, Selengut J, Haft D, Mather MW, Vaidya AB, Martin DMA, Fairlamb AH,  
885 Fraunholz MJ, Roos DS, Ralph SA, McFadden GI, Cummings LM, Subramanian GM,  
886 Mungall C, Venter JC, Carucci DJ, Hoffman SL, Newbold C, Davis RW, Fraser CM,  
887 Barrell B. 2002. Genome sequence of the human malaria parasite *Plasmodium*  
888 *falciparum*. *Nature* 419:498–511.
- 889 4. Martin RE, Ginsburg H, Kirk K. 2009. Membrane transport proteins of the malaria  
890 parasite. *Mol Microbiol*. John Wiley & Sons, Ltd (10.1111).
- 891 5. Weiner J, Kooij TWA. 2016. Phylogenetic profiles of all membrane transport proteins of  
892 the malaria parasite highlight new drug targets. *Microb Cell* 3:511–521.
- 893 6. Dean P, Major P, Nakjang S, Hirt RP, Martin Embley T. 2014. Transport proteins of  
894 parasitic protists and their role in nutrient salvage. *Front Plant Sci*. Frontiers Research  
895 Foundation.
- 896 7. Foote SJ, Thompson JK, Cowman AF, Kemp DJ. 1989. Amplification of the multidrug  
897 resistance gene in some chloroquine-resistant isolates of *P. falciparum*. *Cell* 57:921–  
898 930.
- 899 8. Fidock DA, Nomura T, Talley AK, Cooper RA, Dzekunov SM, Ferdig MT, Ursos LMB,  
900 Bir Singh Sidhu A, Naudé B, Deitsch KW, Su XZ, Wootton JC, Roepe PD, Wellems TE.  
901 2000. Mutations in the *P. falciparum* digestive vacuole transmembrane protein PfCRT  
902 and evidence for their role in chloroquine resistance. *Mol Cell* 6:861–871.
- 903 9. Veiga MI, Dhingra SK, Henrich PP, Straimer J, Gnädig N, Uhlemann AC, Martin RE,  
904 Lehane AM, Fidock DA. 2016. Globally prevalent PfMDR1 mutations modulate  
905 *Plasmodium falciparum* susceptibility to artemisinin-based combination therapies. *Nat*  
906 *Commun* 7.
- 907 10. Rijpma SR, Van Der Velden M, Bilos A, Jansen RS, Mahakena S, Russel FGM,  
908 Sauerwein RW, Van De Wetering K, Koenderink JB. 2016. MRP1 mediates folate  
909 transport and antifolate sensitivity in *Plasmodium falciparum*. *FEBS Lett* 590:482–492.
- 910 11. Mesén-Ramírez P, Bergmann B, Elhabiri M, Zhu L, Thien H von, Castro-Peña C,  
911 Gilberger T-W, Davioud-Charvet E, Bozdech Z, Bachmann A, Spielmann T. 2021. The

- 912 parasitophorous vacuole nutrient pore is critical for drug access in malaria parasites and  
913 modulates the fitness cost of artemisinin resistance. *Cell Host Microbe* 0:283.
- 914 12. Cowman AF, Galatis D, Thompson JK. 1994. Selection for mefloquine resistance in  
915 *Plasmodium falciparum* is linked to amplification of the *pfdmr1* gene and cross-  
916 resistance to halofantrine and quinine. *Proc Natl Acad Sci U S A* 91:1143–1147.
- 917 13. Mok S, Liong KY, Lim EH, Huang X, Zhu L, Preiser PR, Bozdech Z. 2014. Structural  
918 polymorphism in the promoter of *pfmpr2* confers *Plasmodium falciparum* tolerance to  
919 quinoline drugs. *Mol Microbiol* 91:918–934.
- 920 14. Lim MYX, LaMonte G, Lee MCS, Reimer C, Tan BH, Corey V, Tjahjadi BF, Chua A,  
921 Nachon M, Wintjens R, Gedeck P, Malleret B, Renia L, Bonamy GMC, Ho PCL, Yeung  
922 BKS, Chow ED, Lim L, Fidock DA, Diagana TT, Winzeler EA, Bifani P. 2016. UDP-  
923 galactose and acetyl-CoA transporters as *Plasmodium* multidrug resistance genes. *Nat*  
924 *Microbiol* 1.
- 925 15. Richards SN, Nash MN, Baker ES, Webster MW, Lehane AM, Shafik SH, Martin RE.  
926 2016. Molecular Mechanisms for Drug Hypersensitivity Induced by the Malaria  
927 Parasite’s Chloroquine Resistance Transporter. *PLoS Pathog* 12.
- 928 16. Cowell AN, Istvan ES, Lukens AK, Gomez-Lorenzo MG, Vanaerschot M, Sakata-Kato  
929 T, Flannery EL, Magistrado P, Owen E, Abraham M, La Monte G, Painter HJ, Williams  
930 RM, Franco V, Linares M, Arriaga I, Bopp S, Corey VC, Gnädig NF, Coburn-Flynn O,  
931 Reimer C, Gupta P, Murithi JM, Moura PA, Fuchs O, Sasaki E, Kim SW, Teng CH,  
932 Wang LT, Akidil A, Adjalley S, Willis PA, Siegel D, Tanaseichuk O, Zhong Y, Zhou Y,  
933 Llinás M, Otilie S, Gamo FJ, Lee MCS, Goldberg DE, Fidock DA, Wirth DF, Winzeler  
934 EA. 2018. Mapping the malaria parasite druggable genome by using in vitro evolution  
935 and chemogenomics. *Science* (80- ) 359:191–199.
- 936 17. Rocamora F, Gupta P, Istvan ES, Luth MR, Carpenter EF, Kümpornsin K, Sasaki E,  
937 Calla J, Mittal N, Carolino K, Owen E, Llinás M, Otilie S, Goldberg DE, Lee MCS,  
938 Winzeler EA. 2021. PfMFR3: A Multidrug-Resistant Modulator in *Plasmodium*  
939 *falciparum*. *ACS Infect Dis* 7:811–825.
- 940 18. Kirk K. 2004. Channels and transporters as drug targets in the *Plasmodium*-infected  
941 erythrocyte. *Acta Trop* 89:285–298.
- 942 19. Koenderink JB, Kavishe RA, Rijpma SR, Russel FGM. 2010. The ABCs of multidrug  
943 resistance in malaria. *Trends Parasitol.* *Trends Parasitol.*
- 944 20. Murithi JM, Deni I, Pasaje CFA, Okombo J, Bridgford JL, Gnädig NF, Edwards RL, Yeo  
945 T, Mok S, Burkhard AY, Coburn-Flynn O, Istvan ES, Sakata-Kato T, Gomez-Lorenzo  
946 MG, Cowell AN, Wicht KJ, Le Manach C, Kalantarov GF, Dey S, Duffey M, Laleu B,  
947 Lukens AK, Otilie S, Vanaerschot M, Trakht IN, Gamo F-J, Wirth DF, Goldberg DE,  
948 Odom John AR, Chibale K, Winzeler EA, Niles JC, Fidock DA. 2021. The *Plasmodium*

- 949 falciparum ABC transporter ABCI3 confers parasite strain-dependent pleiotropic  
950 antimalarial drug resistance. *Cell Chem Biol* 0.
- 951 21. Counihan NA, Modak JK, de Koning-Ward TF. 2021. How Malaria Parasites Acquire  
952 Nutrients From Their Host. *Front Cell Dev Biol* 9:582.
- 953 22. Saliba KJ, Horner HA, Kirk K. 1998. Transport and metabolism of the essential vitamin  
954 pantothenic acid in human erythrocytes infected with the malaria parasite *Plasmodium*  
955 *falciparum*. *J Biol Chem* 273:10190–10195.
- 956 23. Gulati S, Ekland EH, Ruggles K V., Chan RB, Jayabalasingham B, Zhou B, Mantel PY,  
957 Lee MCS, Spottiswoode N, Coburn-Flynn O, Hjelmqvist D, Worgall TS, Marti M, Di  
958 Paolo G, Fidock DA. 2015. Profiling the Essential Nature of Lipid Metabolism in Asexual  
959 Blood and Gametocyte Stages of *Plasmodium falciparum*. *Cell Host Microbe* 18:371–  
960 381.
- 961 24. Mamoun C Ben, Prigge ST, Vial H. 2010. Targeting the lipid metabolic pathways for the  
962 treatment of malaria. *Drug Dev Res*. John Wiley & Sons, Ltd.
- 963 25. Garten M, Beck JR. 2021. Structured to conquer: transport across the *Plasmodium*  
964 parasitophorous vacuole. *Curr Opin Microbiol*. Elsevier Ltd.
- 965 26. Kloehn J, Lacour CE, Soldati-Favre D. 2021. The metabolic pathways and transporters  
966 of the plastid organelle in Apicomplexa. *Curr Opin Microbiol* 63:250–258.
- 967 27. Beck JR, Ho CM. 2021. Transport mechanisms at the malaria parasite-host cell  
968 interface. *PLoS Pathog*. Public Library of Science.
- 969 28. Kenthirapalan S, Waters AP, Matuschewski K, Kooij TWA. 2016. Functional profiles of  
970 orphan membrane transporters in the life cycle of the malaria parasite. *Nat Commun*  
971 7:10519.
- 972 29. Sayers CP, Mollard V, Buchanan HD, McFadden GI, Goodman CD. 2018. A genetic  
973 screen in rodent malaria parasites identifies five new apicoplast putative membrane  
974 transporters, one of which is essential in human malaria parasites. *Cell Microbiol*  
975 20:e12789.
- 976 30. Ginsburg H. 2006. Progress in in silico functional genomics: the malaria Metabolic  
977 Pathways database. *Trends Parasitol* 22:238–240.
- 978 31. Otto TD, Wilinski D, Assefa S, Keane TM, Sarry LR, Böhme U, Lemieux J, Barrell B,  
979 Pain A, Berriman M, Newbold C, Llinás M. 2010. New insights into the blood-stage  
980 transcriptome of *Plasmodium falciparum* using RNA-Seq. *Mol Microbiol* 76:12–24.
- 981 32. Wichers JS, Scholz JAM, Strauss J, Witt S, Lill A, Ehnold LI, Neupert N, Liffner B,  
982 Lühken R, Petter M, Lorenzen S, Wilson DW, Löw C, Lavazec C, Bruchhaus I, Tannich  
983 E, Gilberger TW, Bachmann A. 2019. Dissecting the gene expression, localization,  
984 membrane topology, and function of the *plasmodium falciparum* STEVOR protein  
985 family. *MBio* 10:e01500-19.

- 986 33. Treeck M, Sanders JL, Elias JE, Boothroyd JC. 2011. The phosphoproteomes of  
987 plasmodium falciparum and toxoplasma gondii reveal unusual adaptations within and  
988 beyond the parasites' boundaries. *Cell Host Microbe* 10:410–419.
- 989 34. Pease BN, Huttlin EL, Jedrychowski MP, Talevich E, Harmon J, Dillman T, Kannan N,  
990 Doerig C, Chakrabarti R, Gygi SP, Chakrabarti D. 2013. Global analysis of protein  
991 expression and phosphorylation of three stages of plasmodium falciparum  
992 intraerythrocytic development. *J Proteome Res* 12:4028–4045.
- 993 35. Jumper J, Evans R, Pritzel A, Green T, Figurnov M, Ronneberger O, Tunyasuvunakool  
994 K, Bates R, Žídek A, Potapenko A, Bridgland A, Meyer C, Kohl SAA, Ballard AJ, Cowie  
995 A, Romera-Paredes B, Nikolov S, Jain R, Adler J, Back T, Petersen S, Reiman D,  
996 Clancy E, Zielinski M, Steinegger M, Pacholska M, Berghammer T, Bodenstein S, Silver  
997 D, Vinyals O, Senior AW, Kavukcuoglu K, Kohli P, Hassabis D. 2021. Highly accurate  
998 protein structure prediction with AlphaFold. *Nature* 596:583–589.
- 999 36. Holm L. 2020. DALI and the persistence of protein shape. *Protein Sci* 29:128–140.
- 1000 37. Birnbaum J, Flemming S, Reichard N, Soares AB, Mesén-Ramírez P, Jonscher E,  
1001 Bergmann B, Spielmann T. 2017. A genetic system to study Plasmodium falciparum  
1002 protein function. *Nat Methods* 14:450–456.
- 1003 38. Prommana P, Uthaiyibull C, Wongsombat C, Kamchonwongpaisan S, Yuthavong Y,  
1004 Knuepfer E, Holder AA, Shaw PJ. 2013. Inducible Knockdown of Plasmodium Gene  
1005 Expression Using the glmS Ribozyme. *PLoS One* 8:e73783.
- 1006 39. Tawk L, Chicanne G, Dubremetz J-F, Richard V, Payrastre B, Vial HJ, Roy C, Wengelnik  
1007 K. 2010. Phosphatidylinositol 3-Phosphate, an Essential Lipid in Plasmodium, Localizes  
1008 to the Food Vacuole Membrane and the Apicoplast. *Eukaryot Cell* 9:1519–1530.
- 1009 40. Jonscher E, Flemming S, Schmitt M, Sabitzki R, Reichard N, Birnbaum J, Bergmann B,  
1010 Höhn K, Spielmann T. 2019. PfVPS45 Is Required for Host Cell Cytosol Uptake by  
1011 Malaria Blood Stage Parasites. *Cell Host Microbe* 25:166-173.e5.
- 1012 41. Waller RF, Reed MB, Cowman AF, McFadden GI. 2000. Protein trafficking to the plastid  
1013 of Plasmodium falciparum is via the secretory pathway. *EMBO J* 19:1794–1802.
- 1014 42. Birnbaum J, Scharf S, Schmidt S, Jonscher E, Hoeijmakers WAM, Flemming S,  
1015 Toenhake CG, Schmitt M, Sabitzki R, Bergmann B, Fröhlke U, Mesén-Ramírez P,  
1016 Blancke Soares A, Herrmann H, Bártfai R, Spielmann T. 2020. A Kelch13-defined  
1017 endocytosis pathway mediates artemisinin resistance in malaria parasites. *Science* (80-  
1018 ) 367:51–59.
- 1019 43. Inoue T, Heo W Do, Grimley JS, Wandless TJ, Meyer T. 2005. An inducible translocation  
1020 strategy to rapidly activate and inhibit small GTPase signaling pathways. *Nat Methods*  
1021 2:415–418.
- 1022 44. Cabrera A, Herrmann S, Warszta D, Santos JM, John Peter AT, Kono M, Debrouver S,

- 1023            Jacobs T, Spielmann T, Ungermann C, Soldati-Favre D, Gilberger TW. 2012. Dissection  
1024            of Minimal Sequence Requirements for Rhoptry Membrane Targeting in the Malaria  
1025            Parasite. *Traffic* 13:1335–1350.
- 1026    45.    Geiger M, Brown C, Wichers JS, Strauss J, Lill A, Thuenauer R, Liffner B, Wilcke L,  
1027            Lemcke S, Heincke D, Pazicky S, Bachmann A, Löw C, Wilson DW, Filarsky M, Burda  
1028            P-C, Zhang K, Junop M, Gilberger TW. 2020. Structural Insights Into PfARO and  
1029            Characterization of its Interaction With PfAIP. *J Mol Biol* 432:878–896.
- 1030    46.    Peterson MG, Marshall VM, Smythe JA, Crewther PE, Lew A, Silva A, Anders RF, Kemp  
1031            DJ. 1989. Integral membrane protein located in the apical complex of *Plasmodium*  
1032            *falciparum*. *Mol Cell Biol* 9:3151–3154.
- 1033    47.    Wichers JS, Wunderlich J, Heincke D, Pazicky S, Strauss J, Schmitt M, Kimmel J,  
1034            Wilcke L, Scharf S, von Thien H, Burda P, Spielmann T, Löw C, Filarsky M, Bachmann  
1035            A, Gilberger TW. 2021. Identification of novel inner membrane complex and apical  
1036            annuli proteins of the malaria parasite *Plasmodium falciparum*. *Cell Microbiol*  
1037            23:e13341.
- 1038    48.    Jullien N, Goddard I, Selmi-Ruby S, Fina J-L, Cremer H, Herman J-P. 2007. Conditional  
1039            Transgenesis Using Dimerizable Cre (DiCre). *PLoS One* 2:e1355.
- 1040    49.    Andenmatten N, Egarter S, Jackson AJ, Jullien N, Herman JP, Meissner M. 2013.  
1041            Conditional genome engineering in *Toxoplasma gondii* uncovers alternative invasion  
1042            mechanisms. *Nat Methods* 10:125–127.
- 1043    50.    Holder AA, Lockyer MJ, Odink KG, Sandhu JS, Riveros-Moreno V, Nicholls SC, Hillman  
1044            Y, Davey LS, Tizard MLV, Schwarz RT, Freeman RR. 1985. Primary structure of the  
1045            precursor to the three major surface antigens of *Plasmodium falciparum* merozoites.  
1046            *Nature* 317:270–273.
- 1047    51.    Mesén-Ramírez P, Bergmann B, Tran TT, Garten M, Stäcker J, Naranjo-Prado I, Höhn  
1048            K, Zimmerberg J, Spielmann T. 2019. EXP1 is critical for nutrient uptake across the  
1049            parasitophorous vacuole membrane of malaria parasites. *PLoS Biol* 17:e3000473.
- 1050    52.    López-Barragán MJ, Lemieux J, Quiñones M, Williamson KC, Molina-Cruz A, Cui K,  
1051            Barillas-Mury C, Zhao K, Su X zhuan. 2011. Directional gene expression and antisense  
1052            transcripts in sexual and asexual stages of *Plasmodium falciparum*. *BMC Genomics*  
1053            12:587.
- 1054    53.    Lasonder E, Rijpma SR, Van Schaijk BCL, Hoeijmakers WAM, Kensche PR, Gresnigt  
1055            MS, Italiaander A, Vos MW, Woestenenk R, Bousema T, Mair GR, Khan SM, Janse CJ,  
1056            Bártfai R, Sauerwein RW. 2016. Integrated transcriptomic and proteomic analyses of *P.*  
1057            *falciparum* gametocytes: Molecular insight into sex-specific processes and translational  
1058            repression. *Nucleic Acids Res* 44:6087–6101.
- 1059    54.    Gómez-Díaz E, Yerbanga RS, Lefèvre T, Cohuet A, Rowley MJ, Ouedraogo JB, Corces

- 1060 VG. 2017. Epigenetic regulation of *Plasmodium falciparum* clonally variant gene  
1061 expression during development in *Anopheles gambiae*. *Sci Rep* 7.
- 1062 55. Boltryk SD, Passecker A, Alder A, Carrington E, van de Vegte-Bolmer M, van Gemert  
1063 G-J, van der Starre A, Beck H-P, Sauerwein RW, Kooij TWA, Brancucci NMB,  
1064 Proellochs NI, Gilberger T-W, Voss TS. 2021. CRISPR/Cas9-engineered inducible  
1065 gametocyte producer lines as a valuable tool for *Plasmodium falciparum* malaria  
1066 transmission research. *Nat Commun* 12:4806.
- 1067 56. Filarsky M, Fraschka SA, Niederwieser I, Brancucci NMB, Carrington E, Carrió E, Moes  
1068 S, Jenoe P, Bártfai R, Voss TS. 2018. GDV1 induces sexual commitment of malaria  
1069 parasites by antagonizing HP1-dependent gene silencing. *Science* (80- ) 359:1259–  
1070 1263.
- 1071 57. Ennist NM, Stayrook SE, Dutton PL, Moser CC. 2017. 5VJT: De Novo Photosynthetic  
1072 Reaction Center Protein Equipped with Heme B and Zn(II) cations. doi:  
1073 [10.2210/pdb5vjt/pdb](https://doi.org/10.2210/pdb5vjt/pdb)
- 1074 58. Sonnhammer EL, von Heijne G, Krogh A. 1998. A hidden Markov model for predicting  
1075 transmembrane helices in protein sequences. *Proceedings Int Conf Intell Syst Mol Biol*  
1076 6:175–82.
- 1077 59. Käll L, Krogh A, Sonnhammer ELL. 2004. A combined transmembrane topology and  
1078 signal peptide prediction method. *J Mol Biol* 338:1027–1036.
- 1079 60. Aurrecochea C, Brestelli J, Brunk BP, Dommer J, Fischer S, Gajria B, Gao X, Gingle  
1080 A, Grant G, Harb OS, Heiges M, Innamorato F, Iodice J, Kissinger JC, Kraemer E, Li W,  
1081 Miller JA, Nayak V, Pennington C, Pinney DF, Roos DS, Ross C, Stoeckert CJ,  
1082 Treatman C, Wang H. 2009. PlasmoDB: a functional genomic database for malaria  
1083 parasites. *Nucleic Acids Res* 37:D539–D543.
- 1084 61. Wunderlich J, Rohrbach P, Dalton JP. 2012. The malaria digestive vacuole. *Front Biosci*  
1085 (Schol Ed) 4:1424–48.
- 1086 62. Tabuchi M, Yoshimori T, Yamaguchi K, Yoshida T, Kishi F. 2000. Human  
1087 NRAMP2/DMT1, which mediates iron transport across endosomal membranes, is  
1088 localized to late endosomes and lysosomes in HEP-2 cells. *J Biol Chem* 275:22220–  
1089 22228.
- 1090 63. Zhang M, Wang C, Otto TD, Oberstaller J, Liao X, Adapa SR, Udenze K, Bronner IF,  
1091 Casandra D, Mayho M, Brown J, Li S, Swanson J, Rayner JC, Jiang RHY, Adams JH.  
1092 2018. Uncovering the essential genes of the human malaria parasite *Plasmodium*  
1093 *falciparum* by saturation mutagenesis. *Science* 360:eaap7847.
- 1094 64. Kennedy K, Cobbold SA, Hanssen E, Birnbaum J, Spillman NJ, McHugh E, Brown H,  
1095 Tilley L, Spielmann T, McConville MJ, Ralph SA. 2019. Delayed death in the malaria  
1096 parasite *Plasmodium falciparum* is caused by disruption of prenylation-dependent

- 1097 intracellular trafficking. PLOS Biol 17:e3000376.
- 1098 65. Pasaje CFA, Cheung V, Kennedy K, Lim EE, Baell JB, Griffin MDW, Ralph SA. 2016.  
1099 Selective inhibition of apicoplast tryptophanyl-tRNA synthetase causes delayed death  
1100 in Plasmodium falciparum. Sci Rep 6:1–13.
- 1101 66. Yeh E, DeRisi JL. 2011. Chemical rescue of malaria parasites lacking an apicoplast  
1102 defines organelle function in blood-stage plasmodium falciparum. PLoS Biol 9.
- 1103 67. Bushell E, Gomes AR, Sanderson T, Anar B, Girling G, Herd C, Metcalf T, Modrzynska  
1104 K, Schwach F, Martin RE, Mather MW, McFadden GI, Parts L, Rutledge GG, Vaidya  
1105 AB, Wengelnik K, Rayner JC, Billker O. 2017. Functional Profiling of a Plasmodium  
1106 Genome Reveals an Abundance of Essential Genes. Cell 170:260-272.e8.
- 1107 68. Chasen NM, Stasic AJ, Asady B, Coppens I, Moreno SNJ. 2019. The Vacuolar Zinc  
1108 Transporter TgZnT Protects Toxoplasma gondii from Zinc Toxicity. mSphere 4:e00086-  
1109 19.
- 1110 69. Jiang Y, Wei J, Cui H, Liu C, Zhi Y, Jiang Z, Li Z, Li S, Yang Z, Wang X, Qian P, Zhang  
1111 C, Zhong C, Su X, Yuan J. 2020. An intracellular membrane protein GEP1 regulates  
1112 xanthurenic acid induced gametogenesis of malaria parasites. Nat Commun 11:1764.
- 1113 70. Liu W, Sundararaman SA, Loy DE, Learn GH, Li Y, Plenderleith LJ, Ndjango JBN,  
1114 Speede S, Atencia R, Cox D, Shaw GM, Ayoub A, Peeters M, Rayner JC, Hahn BH,  
1115 Sharp PM. 2016. Multigenomic delineation of Plasmodium species of the Laverania  
1116 subgenus infecting wild-living chimpanzees and gorillas. Genome Biol Evol 8:1929–  
1117 1939.
- 1118 71. Zanghì G, Vembar SS, Baumgarten S, Ding S, Guizetti J, Bryant JM, Mattei D, Jensen  
1119 ATR, Rénia L, Goh YS, Sauerwein R, Hermsen CC, Franetich J-F, Bordessoulles M,  
1120 Silvie O, Soulard V, Scatton O, Chen P, Mecheri S, Mazier D, Scherf A. 2018. A Specific  
1121 PfEMP1 Is Expressed in P. falciparum Sporozoites and Plays a Role in Hepatocyte  
1122 Infection. Cell Rep 22:2951–2963.
- 1123 72. Howick VM, Russell AJC, Andrews T, Heaton H, Reid AJ, Natarajan K, Butungi H,  
1124 Metcalf T, Verzier LH, Rayner JC, Berriman M, Herren JK, Billker O, Hemberg M,  
1125 Talman AM, Lawniczak MKN. 2019. The malaria cell atlas: Single parasite  
1126 transcriptomes across the complete Plasmodium life cycle. Science (80- ) 365.
- 1127 73. Burda P-C, Crosskey T, Lauk K, Zurborg A, Söhnchen C, Liffner B, Wilcke L, Strauss J,  
1128 Jeffries CM, Svergun DI, Wilson DW, Wilmanns M, Gilberger T-W, Pietsch E, Strauss  
1129 J, Jeffries CM, Svergun DI, Wilson DW, Wilmanns M, Gilberger T-W. 2020. Structure-  
1130 Based Identification and Functional Characterization of a Lipocalin in the Malaria  
1131 Parasite Plasmodium falciparum. Cell Rep 31:107817.
- 1132 74. Auburn S, Böhme U, Steinbiss S, Trimarsanto H, Hostetler J, Sanders M, Gao Q, Nosten  
1133 F, Newbold CI, Berriman M, Price RN, Otto TD. 2016. A new Plasmodium vivax

- 1134 reference sequence with improved assembly of the subtelomeres reveals an abundance  
1135 of pir genes. Wellcome Open Res 1:4.
- 1136 75. Pain A, Böhme U, Berry AE, Mungall K, Finn RD, Jackson AP, Mourier T, Mistry J,  
1137 Pasini EM, Aslett MA, Balasubramaniam S, Borgwardt K, Brooks K, Carret C, Carver  
1138 TJ, Cherevach I, Chillingworth T, Clark TG, Galinski MR, Hall N, Harper D, Harris D,  
1139 Hauser H, Ivens A, Janssen CS, Keane T, Larke N, Lapp S, Marti M, Moule S, Meyer  
1140 IM, Ormond D, Peters N, Sanders M, Sanders S, Sargeant TJ, Simmonds M, Smith F,  
1141 Squares R, Thurston S, Tivey AR, Walker D, White B, Zuiderwijk E, Churcher C, Quail  
1142 MA, Cowman AF, Turner CMR, Rajandream MA, Kocken CHM, Thomas AW, Newbold  
1143 CI, Barrell BG, Berriman M. 2008. The genome of the simian and human malaria  
1144 parasite *Plasmodium knowlesi*. Nature 455:799–803.
- 1145 76. Liman ER, Tytgat J, Hess P. 1992. Subunit stoichiometry of a mammalian K<sup>+</sup> channel  
1146 determined by construction of multimeric cDNAs. Neuron 9:861–871.
- 1147 77. Beck S, Yu-Strzelczyk J, Pauls D, Constantin OM, Gee CE, Ehmman N, Kittel RJ, Nagel  
1148 G, Gao S. 2018. Synthetic Light-Activated Ion Channels for Optogenetic Activation and  
1149 Inhibition. Front Neurosci 12:643.
- 1150 78. Trager W, Jensen JB. 1997. Continuous culture of *Plasmodium falciparum*: its impact  
1151 on malaria research. Int J Parasitol 27:989–1006.
- 1152 79. Lambros C, Vanderberg JP. 1979. Synchronization of *Plasmodium falciparum*  
1153 Erythrocytic Stages in Culture. J Parasitol 65:418.
- 1154 80. Ponnudurai T, Lensen AHW, Meis JFGM, Meuwissen JHE. 1986. Synchronization of  
1155 *Plasmodium falciparum* gametocytes using an automated suspension culture system.  
1156 Parasitology 93:263–274.
- 1157 81. Rivadeneira E, Wasserman M, Espinal C. 1983. Separation and Concentration of  
1158 Schizonts of *Plasmodium falciparum* by Percoll Gradients. J Protozool 30:367–370.
- 1159 82. Moon RW, Hall J, Rangkuti F, Ho YS, Almond N, Mitchell GH, Pain A, Holder AA,  
1160 Blackman MJ. 2013. Adaptation of the genetically tractable malaria pathogen  
1161 *Plasmodium knowlesi* to continuous culture in human erythrocytes. Proc Natl Acad Sci  
1162 110:531–536.
- 1163 83. Ganesan SM, Morrissey JM, Ke H, Painter HJ, Laroiya K, Phillips MA, Rathod PK, Mather  
1164 MW, Vaidya AB. 2011. Yeast dihydroorotate dehydrogenase as a new selectable  
1165 marker for *Plasmodium falciparum* transfection. Mol Biochem Parasitol 177:29–34.
- 1166 84. Grüning C, Spielmann T. 2012. Imaging of live malaria blood stage parasites. Methods  
1167 Enzymol 506:81–92.
- 1168 85. Bachmann A, Scholz JAM, Janßen M, Klinkert M-Q, Tannich E, Bruchhaus I, Petter M.  
1169 2015. A comparative study of the localization and membrane topology of members of  
1170 the RIFIN, STEVOR and PfMC-2TM protein families in *Plasmodium falciparum*-infected



- 1171 erythrocytes. *Malar J* 14:274.
- 1172 86. Collins CR, Hackett F, Strath M, Penzo M, Withers-Martinez C, Baker DA, Blackman  
1173 MJ. 2013. Malaria Parasite cGMP-dependent Protein Kinase Regulates Blood Stage  
1174 Merozoite Secretory Organelle Discharge and Egress. *PLoS Pathog* 9:e1003344.
- 1175 87. Tonkin CJ, Van Dooren GG, Spurck TP, Struck NS, Good RT, Handman E, Cowman  
1176 AF, McFadden GI. 2004. Localization of organellar proteins in *Plasmodium falciparum*  
1177 using a novel set of transfection vectors and a new immunofluorescence fixation  
1178 method. *Mol Biochem Parasitol* 137:13–21.
- 1179 88. Blackman MJ, Whittle H, Holder AA. 1991. Processing of the *Plasmodium falciparum*  
1180 major merozoite surface protein-1: identification of a 33-kilodalton secondary  
1181 processing product which is shed prior to erythrocyte invasion. *Mol Biochem Parasitol*  
1182 49:35–44.
- 1183 89. Schindelin J, Arganda-Carreras I, Frise E, Kaynig V, Longair M, Pietzsch T, Preibisch  
1184 S, Rueden C, Saalfeld S, Schmid B, Tinevez J-Y, White DJ, Hartenstein V, Eliceiri K,  
1185 Tomancak P, Cardona A. 2012. Fiji: an open-source platform for biological-image  
1186 analysis. *Nat Methods* 9:676–682.
- 1187 90. Mesén-Ramírez P, Reinsch F, Blancke Soares A, Bergmann B, Ullrich AK, Tenzer S,  
1188 Spielmann T. 2016. Stable Translocation Intermediates Jam Global Protein Export in  
1189 *Plasmodium falciparum* Parasites and Link the PTEX Component EXP2 with  
1190 Translocation Activity. *PLoS Pathog* 12:e1005618.
- 1191 91. Malleret B, Claser C, Ong ASM, Suwanarusk R, Sriprawat K, Howland SW, Russell B,  
1192 Nosten F, Rénia L. 2011. A rapid and robust tri-color flow cytometry assay for monitoring  
1193 malaria parasite development. *Sci Rep* 1:118.
- 1194 92. Wichers JS, van Gelder C, Fuchs G, Ruge JM, Pietsch E, Ferreira JL, Safavi S, von  
1195 Thien H, Burda P-C, Mesén-Ramírez P, Spielmann T, Strauss J, Gilberger T-W,  
1196 Bachmann A. 2021. Characterization of Apicomplexan Amino Acid Transporters  
1197 (ApiATs) in the Malaria Parasite *Plasmodium falciparum*. *mSphere*  
1198 <https://doi.org/10.1128/mSphere.00743-21>.
- 1199 93. Galen SC, Borner J, Martinsen ES, Schaer J, Austin CC, West CJ, Perkins SL. 2018.  
1200 The polyphyly of *Plasmodium*: Comprehensive phylogenetic analyses of the malaria  
1201 parasites (Order Haemosporida) reveal widespread taxonomic conflict. *R Soc Open Sci*  
1202 5.
- 1203 94. Yu G, Smith DK, Zhu H, Guan Y, Lam TT-Y. 2017. ggtree : an r package for visualization  
1204 and annotation of phylogenetic trees with their covariates and other associated data.  
1205 *Methods Ecol Evol* 8:28–36.
- 1206 95. Yu G. 2020. Using ggtree to Visualize Data on Tree-Like Structures. *Curr Protoc*  
1207 *Bioinforma* 69:e96.

- 1208 96. Katoh K, Standley DM. 2013. MAFFT Multiple Sequence Alignment Software Version  
1209 7: Improvements in Performance and Usability. *Mol Biol Evol* 30:772–780.
- 1210 97. Madeira F, Park YM, Lee J, Buso N, Gur T, Madhusoodanan N, Basutkar P, Tivey ARN,  
1211 Potter SC, Finn RD, Lopez R. 2019. The EMBL-EBI search and sequence analysis tools  
1212 APIs in 2019. *Nucleic Acids Res* 47:W636–W641.
- 1213 98. R Core Team. 2017. R: A language and environment for statistical computing. R Found  
1214 Stat Comput Vienna, Austria.
- 1215 99. Wickham H. 2016. Ggplot2 : elegant graphics for data analysis. Springer.
- 1216 100. Lin Pedersen T. 2020. patchwork, The Composer of Plots.
- 1217 101. Lord SJ, Velle KB, Mullins RD, Fritz-Laylin LK. 2020. SuperPlots: Communicating  
1218 reproducibility and variability in cell biology. *J Cell Biol* 219.
- 1219 102. Tibúrcio M, Hitz E, Niederwieser I, Kelly G, Davies H, Doerig C, Billker O, Voss TS,  
1220 Treeck M. 2021. A 39-Amino-Acid C-Terminal Truncation of GDV1 Disrupts Sexual  
1221 Commitment in *Plasmodium falciparum*. *mSphere* 6.
- 1222 103. Eksi S, Morahan BJ, Haile Y, Furuya T, Jiang H, Ali O, Xu H, Kiattibutr K, Suri A, Czesny  
1223 B, Adeyemo A, Myers TG, Sattabongkot J, Su X zhuan, Williamson KC. 2012.  
1224 *Plasmodium falciparum* Gametocyte Development 1 (Pfgdv1) and Gametocytogenesis  
1225 Early Gene Identification and Commitment to Sexual Development. *PLoS Pathog* 8.
- 1226 104. Omasits U, Ahrens CH, Müller S, Wollscheid B. 2014. Protter: Interactive protein feature  
1227 visualization and integration with experimental proteomic data. *Bioinformatics* 30:884–  
1228 886.
- 1229

1230 **Table S1:** Oligonucleotides **(A)** and plasmids **(B)** used in this study.

1231 **A**

| inter<br>nal # | Target or<br>Primer<br>name | Sequence                                  | Purpose             |
|----------------|-----------------------------|-------------------------------------------|---------------------|
| 284            | PF3D7_071<br>6900 rv        | GGGacgcgtTAACATCAATTTTGCTTTTTTGGG         | cloning<br>GFP-glmS |
| 285            | PF3D7_071<br>6900 fw        | GGGgcgccgctaaGGGTGTGGTAATTCAAGTACG        |                     |
| 280            | PF3D7_052<br>3800 rv        | GGGacgcgtATTTTCGTTGAATATAATTTTTTTAATTG    |                     |
| 281            | PF3D7_052<br>3800 fw        | GGGgcgccgctaaGTTTTCTTGTGGTATTTAGCTG       |                     |
| 282            | PF3D7_060<br>9100 rv        | GGGacgcgtATGATTATGACCATGATCATGATC         |                     |
| 283            | PF3D7_060<br>9100 fw        | GGGgcgccgctaaGGATAGCAGGTGTACGGTTTCTTTATC  |                     |
| 288            | PF3D7_144<br>0800 rv        | GGGacgcgtATTAGTAATAGAATTTTCATCTTG         |                     |
| 289            | PF3D7_144<br>0800 fw        | GGGgcgccgctaaCATTTGCTTCAAATTTGATGAG       |                     |
| 290            | Pf3D7_1135<br>300 rv        | GGGacgcgtAGAAGTTTTGGGGCATATTTCTTTG        |                     |
| 338            | Pf3D7_0715<br>900 (11)      | GGGgcgccgctaaCTGGAAATAAATAGATGGAACGCTCTTG |                     |
| 339            | Pf3D7_0715<br>900 (11)      | GGGacgcgtAGTATCCCCTTTCAATGTGGAAC          |                     |

|     |                                             |                                            |                            |
|-----|---------------------------------------------|--------------------------------------------|----------------------------|
| 291 | Pf3D7_1135<br>300 fw                        | GGGgcgccgctaaGTTATATTATAAAAGGATGATTGG      |                            |
| 315 | PF3D7_052<br>3800 (1)<br>TGD fw             | GCGGCCGCTAAAGGAGCACTAAAGGCCAAAGGAAGT       |                            |
| 316 | PF3D7_052<br>3800 (1)<br>TGD rv             | acgcgtAATAATGTCATCCTTTTCATTATTAATATT       |                            |
| 317 | PF3D7_060<br>9100 (2)<br>TGD fw             | GCGGCCGCTAAGATTTGTTATTTGCAAAAATAATTTGTATT  |                            |
| 318 | PF3D7_060<br>9100 (2)<br>TGD rv             | acgcgtATGTctataaaaaataaatcacatac           |                            |
| 319 | PF3D7_071<br>6900 (3)<br>TGD fw             | GCGGCCGCTAAAAAATGAAATTATATTTTGTACGACATTC   |                            |
| 320 | PF3D7_071<br>6900 (3)<br>TGD rv             | acgcgtGGCAATACCAAAGGTAATTAATAAAATTCC       |                            |
| 323 | PF3D7_144<br>0800 (5)<br>TGD fw             | GCGGCCGCTAAACAATGTTTAAGGATGATGAAAATAATTTT  | cloning TGD                |
| 324 | PF3D7_144<br>0800 (5)<br>TGD rv             | acgcgtTGTATTAACAACAACATAAATACAGAACT        |                            |
|     | Pf3D7_0715<br>900 SLI-Tdg<br>F              | GGTGCGGCCGCGTGGATAAGATGTCGCGTTTG           |                            |
|     | Pf3D7_0715<br>900 SLI-Tdg<br>R              | GGTACGCGTGTGCCTACATTTTTATCATCTTCCTC        |                            |
|     | PF3D7_113<br>5300 – fw<br>NotI TGD          | CTCGgcgccgctaaAAAAGTATGATCTCTGGAATATCCAG   |                            |
|     | PF3D7_113<br>5300 – rv<br>MluI TGD          | TCCTacgcgtATTTATAAAGAGATCTGTTTTATTATC      |                            |
|     | PF3D7_113<br>5300 fw NotI<br>loxP           | CTCGGCCGCCGCCCGGTAATCTCTGGAATATCCAGCAAATTG |                            |
|     | PF3D7_113<br>5300 rv SpeI<br>loxP:          | TCCTACTAGTATTTATAAAGAGATCTGTTTTATTATC      | cloning<br>1135300<br>loxp |
|     | PF3D7_113<br>5300 fw<br>AvrII loxP:         | CTCGCCTAGGATGAAGTCAATGATAAGCGGTATTAG       |                            |
|     | PF3D7_113<br>5300 rv<br>XmaI loxP:          | TCCTCCCGGGCTTGTCTTAGGTGCGTACTTTTTAC        |                            |
| 294 | PF3D7_060<br>9100 int_fw                    | GGTAGTAACAACCTTTGGTTGTTTTATTCC             |                            |
| 295 | PF3D7_060<br>9100 int_rv                    | tatgtggaaggttaataaatggacaaggg              |                            |
| 296 | PF3D7_071<br>6900 int_fw                    | GAAATTATATTTTGTACGACATTCATACTA             |                            |
| 298 | PF3D7_144<br>0800 int_fw                    | GCACAGAACATTTAAGAAGCAATGATTTTA             |                            |
| 299 | PF3D7_144<br>0800 int_rv                    | caactgactagccaaaatgttggtctgg               |                            |
| 300 | PF3D7_113<br>5300 int_fw                    | GATCTCTGGAATATCCAGCAAATTGTTG               |                            |
| 302 | PF3D7_071<br>6900 int_rv                    | atatttatttttgaaccgataagctag                | integration<br>check PCR   |
| 305 | PF3D7_113<br>5300 int_rv                    | gccatatattatacatataaataaagac               |                            |
| 308 | PF3D7_052<br>3800 int_fw                    | GGCAAAGGAAGTTGGCTAACGGGGTGGTAG             |                            |
| 309 | PF3D7_052<br>3800 int_rv                    | gtgtcattcattacctttgaatgg                   |                            |
| 369 | TGD<br>(PF3D7_060<br>9100 ) int<br>check fw | atatatgttttaagctcaaatg                     |                            |
| 370 | TGD<br>(PF3D7_060                           | gaggagaagcaaaaacgaaagttaac                 |                            |

|     |                                            |                                                                                |                                              |
|-----|--------------------------------------------|--------------------------------------------------------------------------------|----------------------------------------------|
|     | 9100 ) int<br>check rv                     |                                                                                |                                              |
| 392 | TGD<br>(Pf3D7_071<br>5900) int<br>check fw | CCCACCGAAATGAACTCTTCGTTGC                                                      |                                              |
| 393 | TGD<br>(Pf3D7_071<br>5900) int<br>check rv | CTTTACCTTTAGAGGAGGAATTATTAG                                                    |                                              |
| 394 | SLI TGD it<br>fw Adelaide                  | gtggaattgtgagcggataac                                                          |                                              |
| 327 | Pf3D7_1135<br>300 compl                    | ctcgagATGAAGTCAATGATAAGCGG                                                     | cloning<br>complement<br>ation<br>constrcuts |
| 328 | Pf3D7_1135<br>300 compl                    | cctaggGCTTGTCTTAGGTGCGTACT                                                     |                                              |
| 553 | PKNH_0933<br>400 fw 553                    | GGGctcgagATGAAGGGAACGTACGTAG                                                   |                                              |
| 554 | PKNH_0933<br>400 rv 554                    | GGGcctaggCACCGCCTTCGAGGCGTAC                                                   |                                              |
| 555 | PVP01_093<br>6100 fw 555                   | GGGctcgagATGAAGGGAACGTACGTAG                                                   |                                              |
| 556 | PVP01_093<br>6100 rv 556                   | GGGcctaggCACCGCCTTCGAGGCGTAC                                                   |                                              |
| p37 | Pf3D7_1135<br>300 fw 5'<br>(TKo)           | GATTTTGATATATGATTATAGGATAG                                                     | excision<br>PCR primer                       |
|     | Neo 40 rv                                  | CGAATAGCCTCTCCACCCAAG                                                          |                                              |
|     | Pf3D7_1135<br>300 fw NotI                  | CTCGgcgccgctaaTTATTATAAATCATATAATAAAATAAATG                                    | cloning<br>1135300-<br>2xFKBP-<br>GFP        |
|     | Pf3D7_1135<br>300 rv AvrII                 | TCCTcctaggAGAAGTTTTGGGGCATATTTCTTTG                                            |                                              |
| 443 | Pf3D7_0715<br>900 (11)<br>KpnI             | GggtaccAGTATCCCCTTTCAATGTGGAAC                                                 | cloning<br>0715900-<br>3xHA                  |
|     | PF3D<br>MutOut F                           | GGAAATGCGGCCGCGTTACTTAAGGACGACAAAATATTCA                                       | cloning of<br>MutIn and<br>MutOut            |
|     | PF3D<br>MutOut R                           | TAAGTAACGCGGCCGATTTCCCTTTATATTGTATTGTGCTATTGCGTTCTGTG<br>AAAGACTAACGTAATTGTTTG |                                              |
|     | PF3D MutIn<br>qcF                          | tCAAGCAGCctttGCTATGGCAttcctattttacataaagatggga                                 |                                              |
|     | PF3D MutIn<br>qcR                          | CATAGCaaagGCTGCTTGaatcGCgaagtaagaacaacgaactcta                                 |                                              |
|     | Pf3D7_1135<br>300 BamH I<br>fw             | cgggatccaccatgaagtcaatgataagcggat                                              | cloning<br>1135300-<br>YFP                   |
|     | Pf3D7_1135<br>300 XhoI rv                  | CCGctcgagaccgctgtcttagtgct                                                     |                                              |

1232

1233 **B**

|                                |            |
|--------------------------------|------------|
| pSLI- <i>PfV</i> VRT1-GFP-glmS | this study |
| pSLI- <i>PfZ</i> IP1-GFP-glmS  | this study |
| pSLI- <i>PfC</i> DF-GFP-glmS   | this study |
| pSLI- <i>PfD</i> MT2-GFP-glmS  | this study |
| pSLI- <i>PfM</i> FS6-GFP-glmS  | this study |
| pSLI- <i>PfM</i> RT1-GFP-glmS  | this study |
| pSLI- <i>PfV</i> VRT1-GFP-TGD  | this study |
| pSLI- <i>PfZ</i> IP1-GFP-TGD   | this study |
| pSLI- <i>PfC</i> DF-GFP-TGD    | this study |
| pSLI- <i>PfD</i> MT2-GFP-TGD   | this study |
| pSLI- <i>PfM</i> FS6-GFP-TGD   | this study |

|                                                        |                           |
|--------------------------------------------------------|---------------------------|
| pSLI- <i>PfPMRT1</i> -GFP-TGD                          | this study                |
| pSLI- <i>PfCDF</i> -3xHA                               | this study                |
| pSLI- <i>PfPMRT1</i> -2xFKBP-GFP                       | this study                |
| P40PX-mCherry                                          | Jonscher et al. 2018 (40) |
| pLyn-FRB-mCherry                                       | Birnbaum et al. 2017 (37) |
| pACP-mCherry                                           | Birnbaum et al. 2020 (42) |
| pARL- <sup><i>ama1</i></sup> ARO-mCherry               | Cabrera et al. 2012 (44)  |
| pARL- <sup><i>ama1</i></sup> AMA1-mCherry              | Wichers et al. 2021 (47)  |
| pSLI- <i>PfPMRT1</i> -loxP                             | this study                |
| pARL- <sup><i>nmd3</i></sup> <i>PfPMRT1</i> -ty1       | this study                |
| pARL- <sup><i>sf3a2</i></sup> <i>PfPMRT1</i> -ty1      | this study                |
| pHcamGDV1-GFP-DD-yDHODH                                | this study                |
| pSkip-Flox                                             | Birnbaum et al. 2017 (37) |
| pARL- <sup><i>nmd3</i></sup> <i>PfPMRT1</i> -MutPV-ty1 | this study                |
| pARL- <sup><i>nmd3</i></sup> <i>PfPMRT1</i> -MutPC-ty1 | this study                |
| pARL- <sup><i>nmd3</i></sup> <i>PvPMRT1</i> -ty1       | this study                |
| pARL- <sup><i>nmd3</i></sup> <i>PkPMRT1</i> -ty1       | this study                |
| pGEM- <i>PfPMRT1</i> -eYFP                             | this study                |
| pGEM- <i>PfPMRT1</i> -MutPV-eYFP                       | this study                |
| pGEM- <i>PfPMRT1</i> -MutPC-eYFP                       | this study                |
| pGEM-SthK-eYFP                                         | this study                |

1234

Figure 1

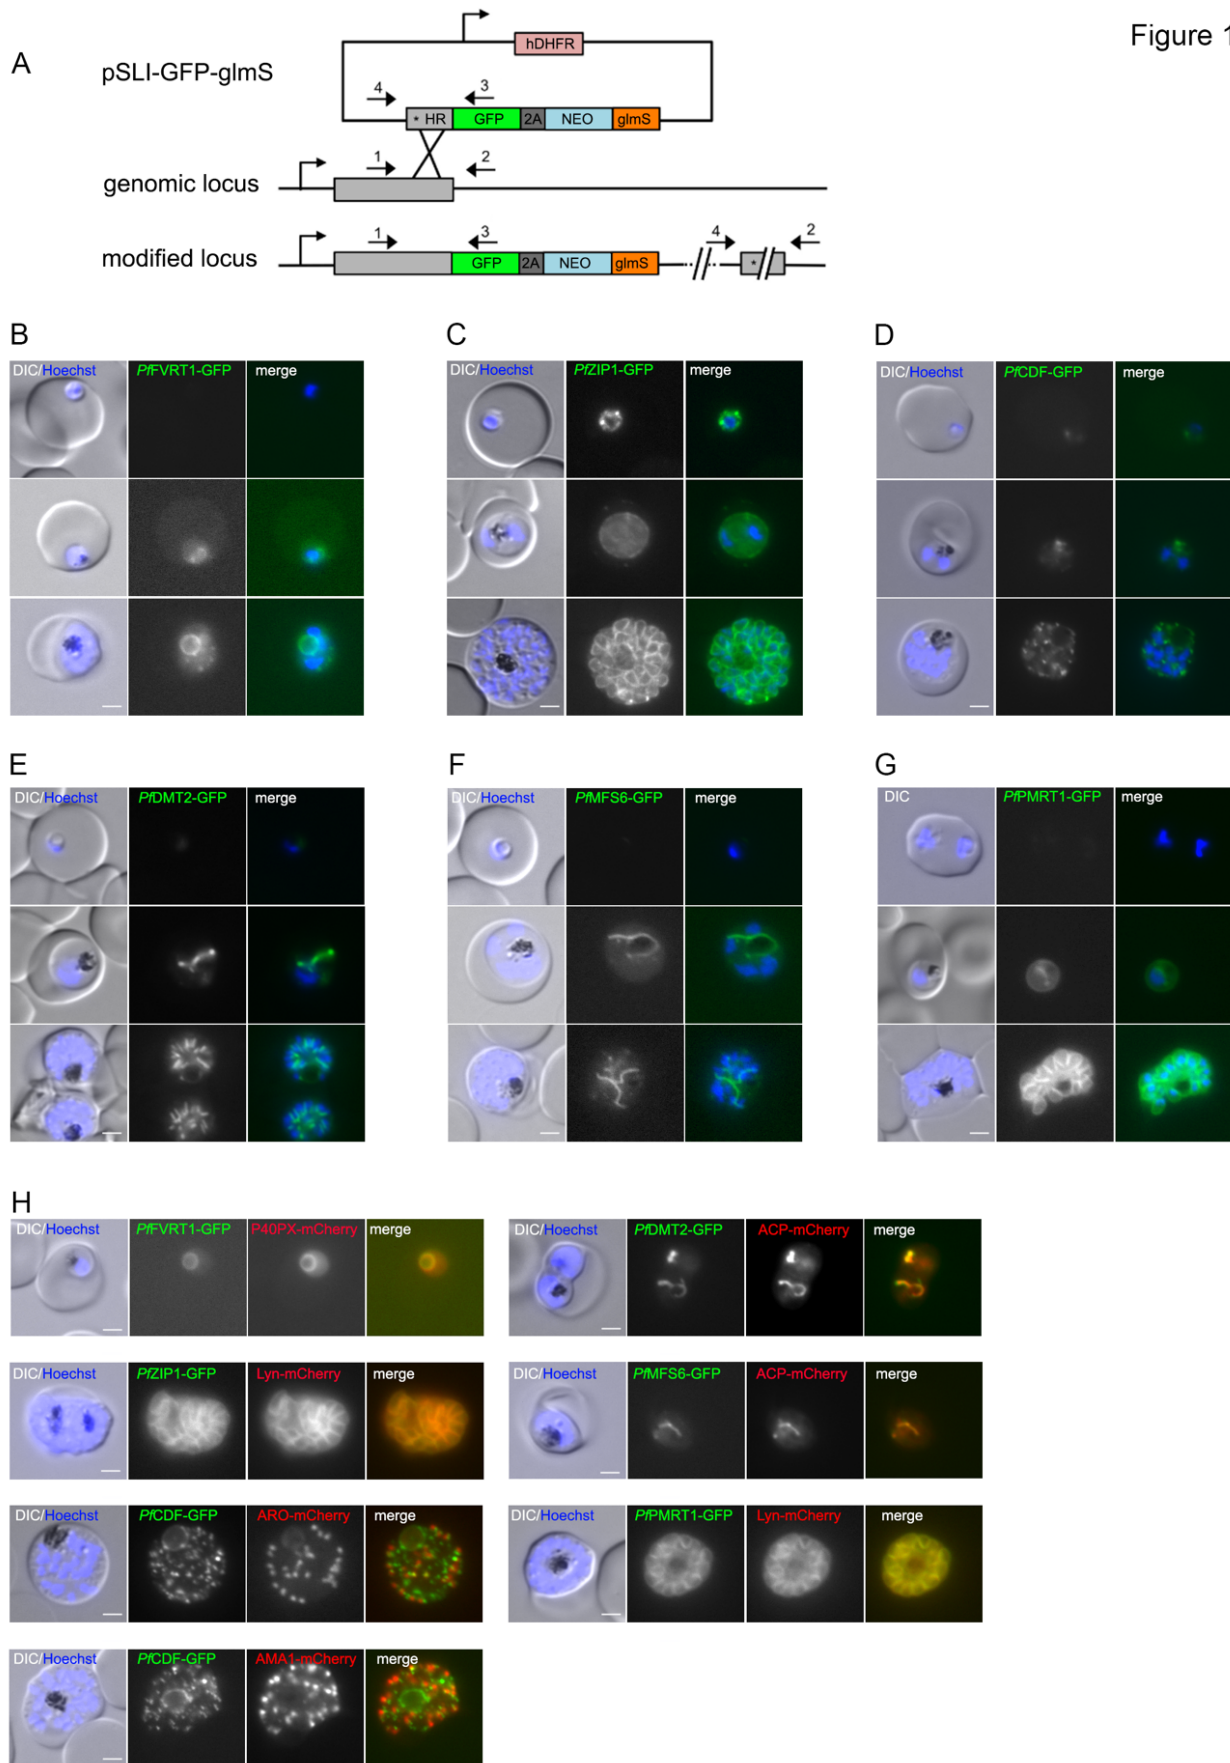

Figure 2

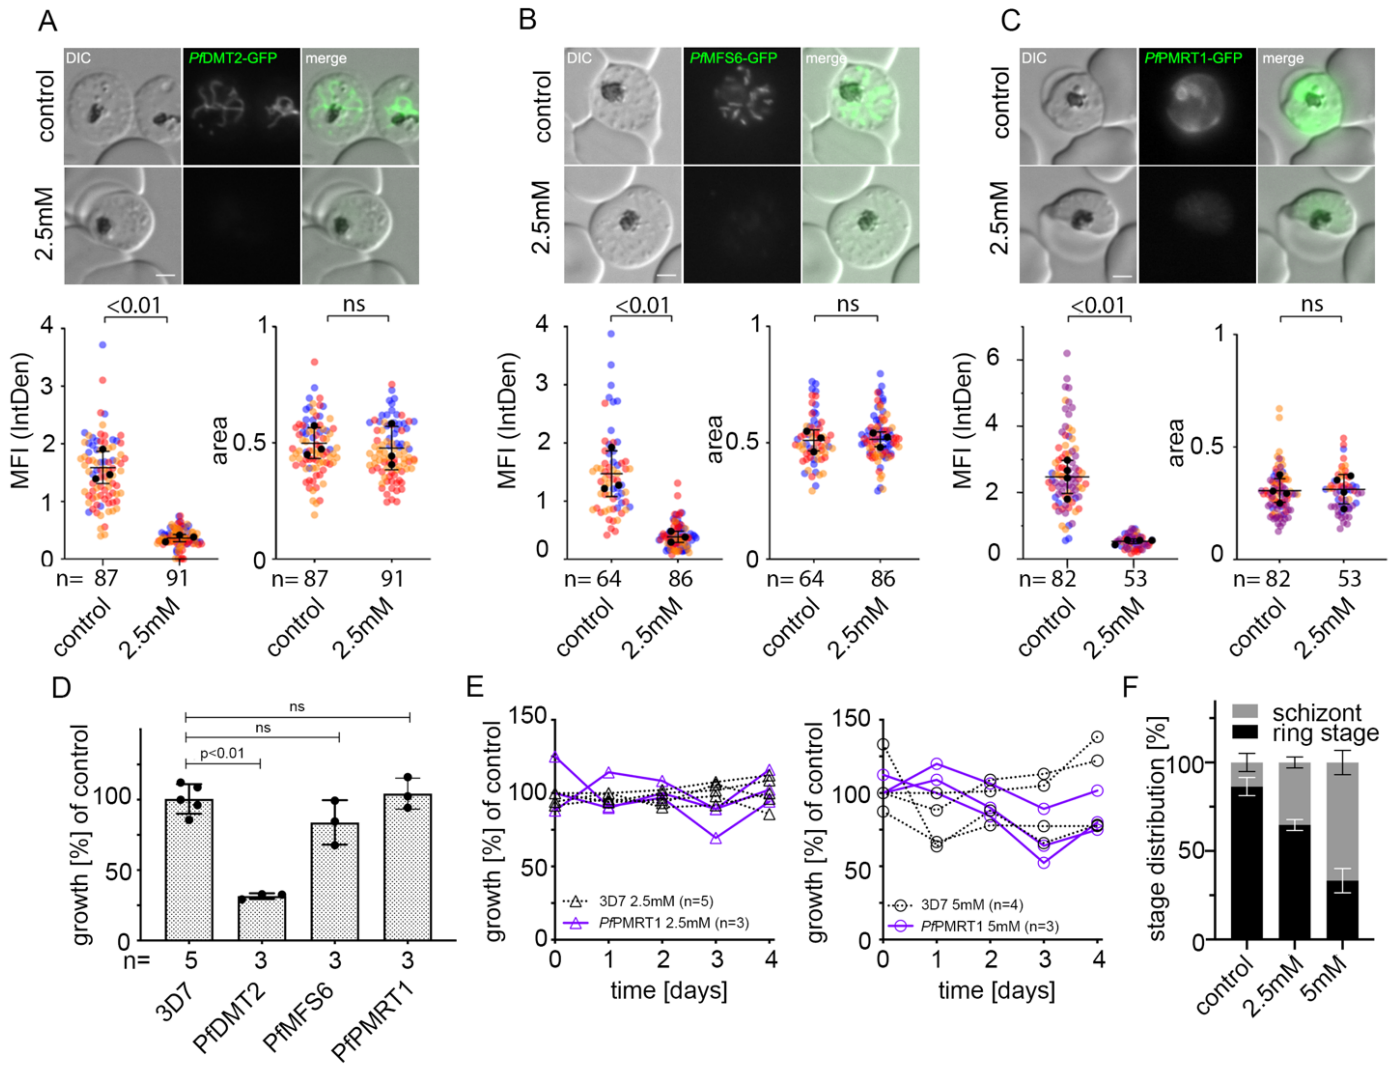

Figure 3

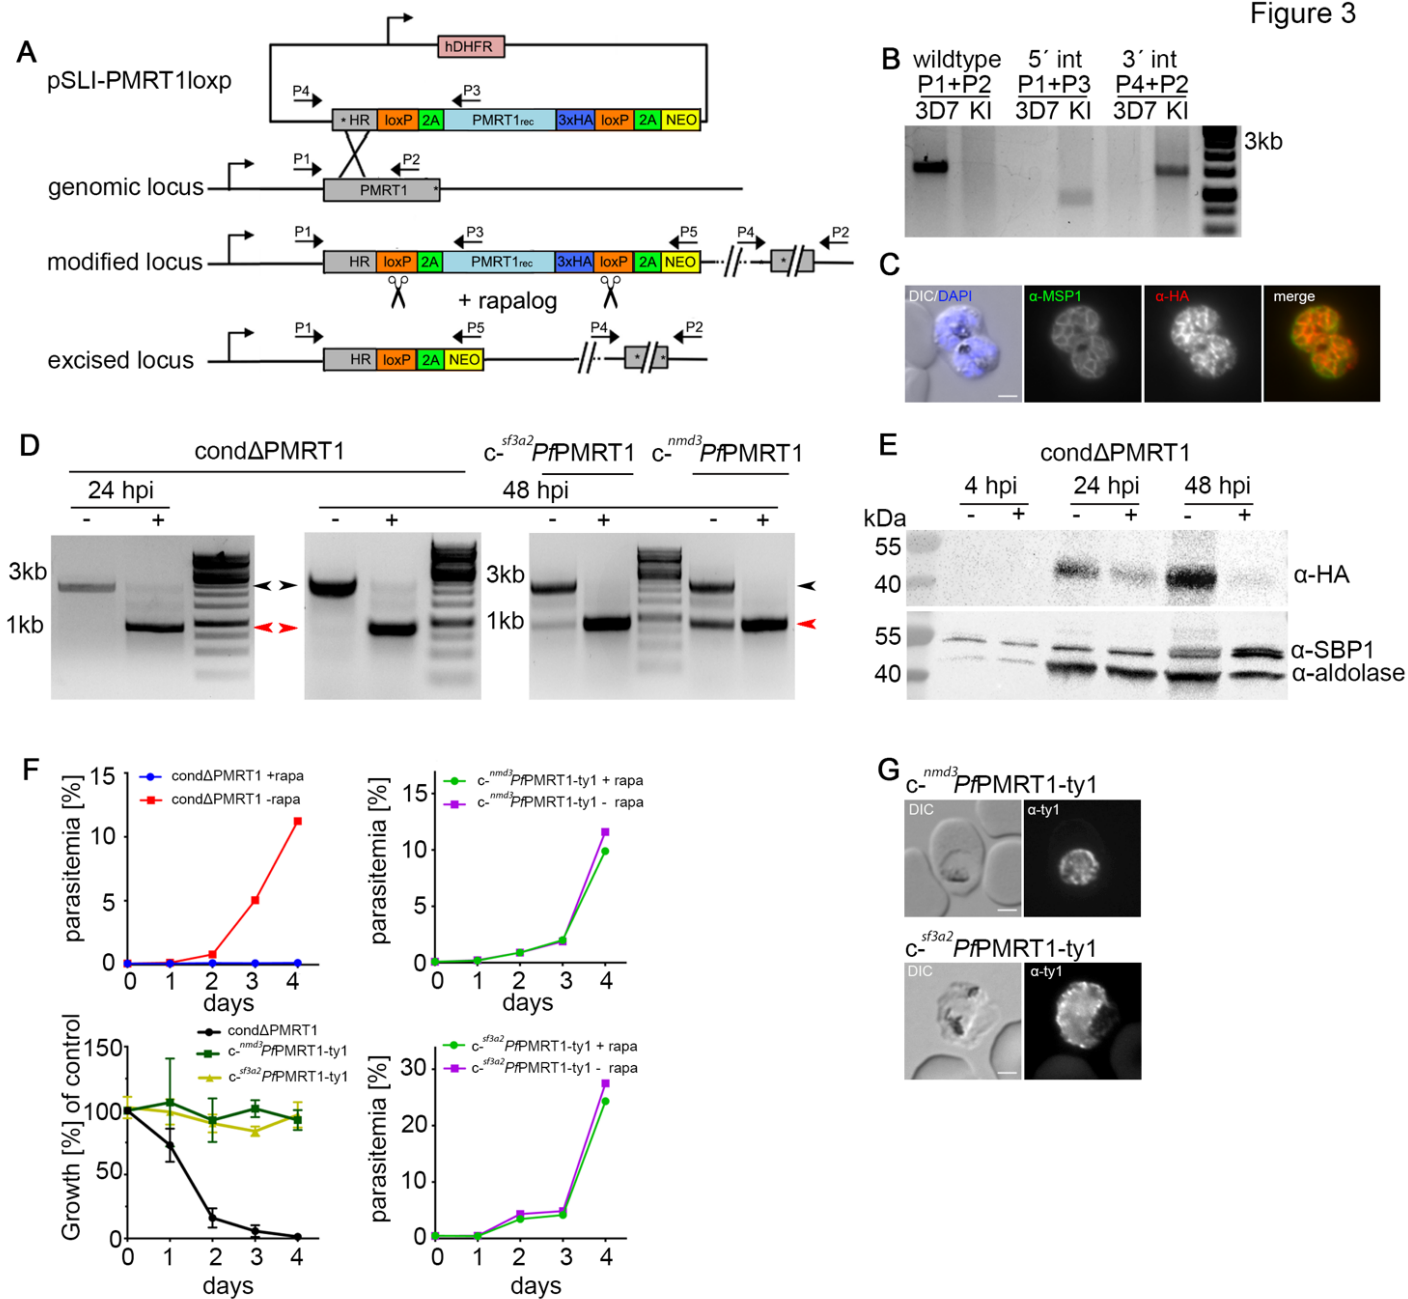



Figure 4

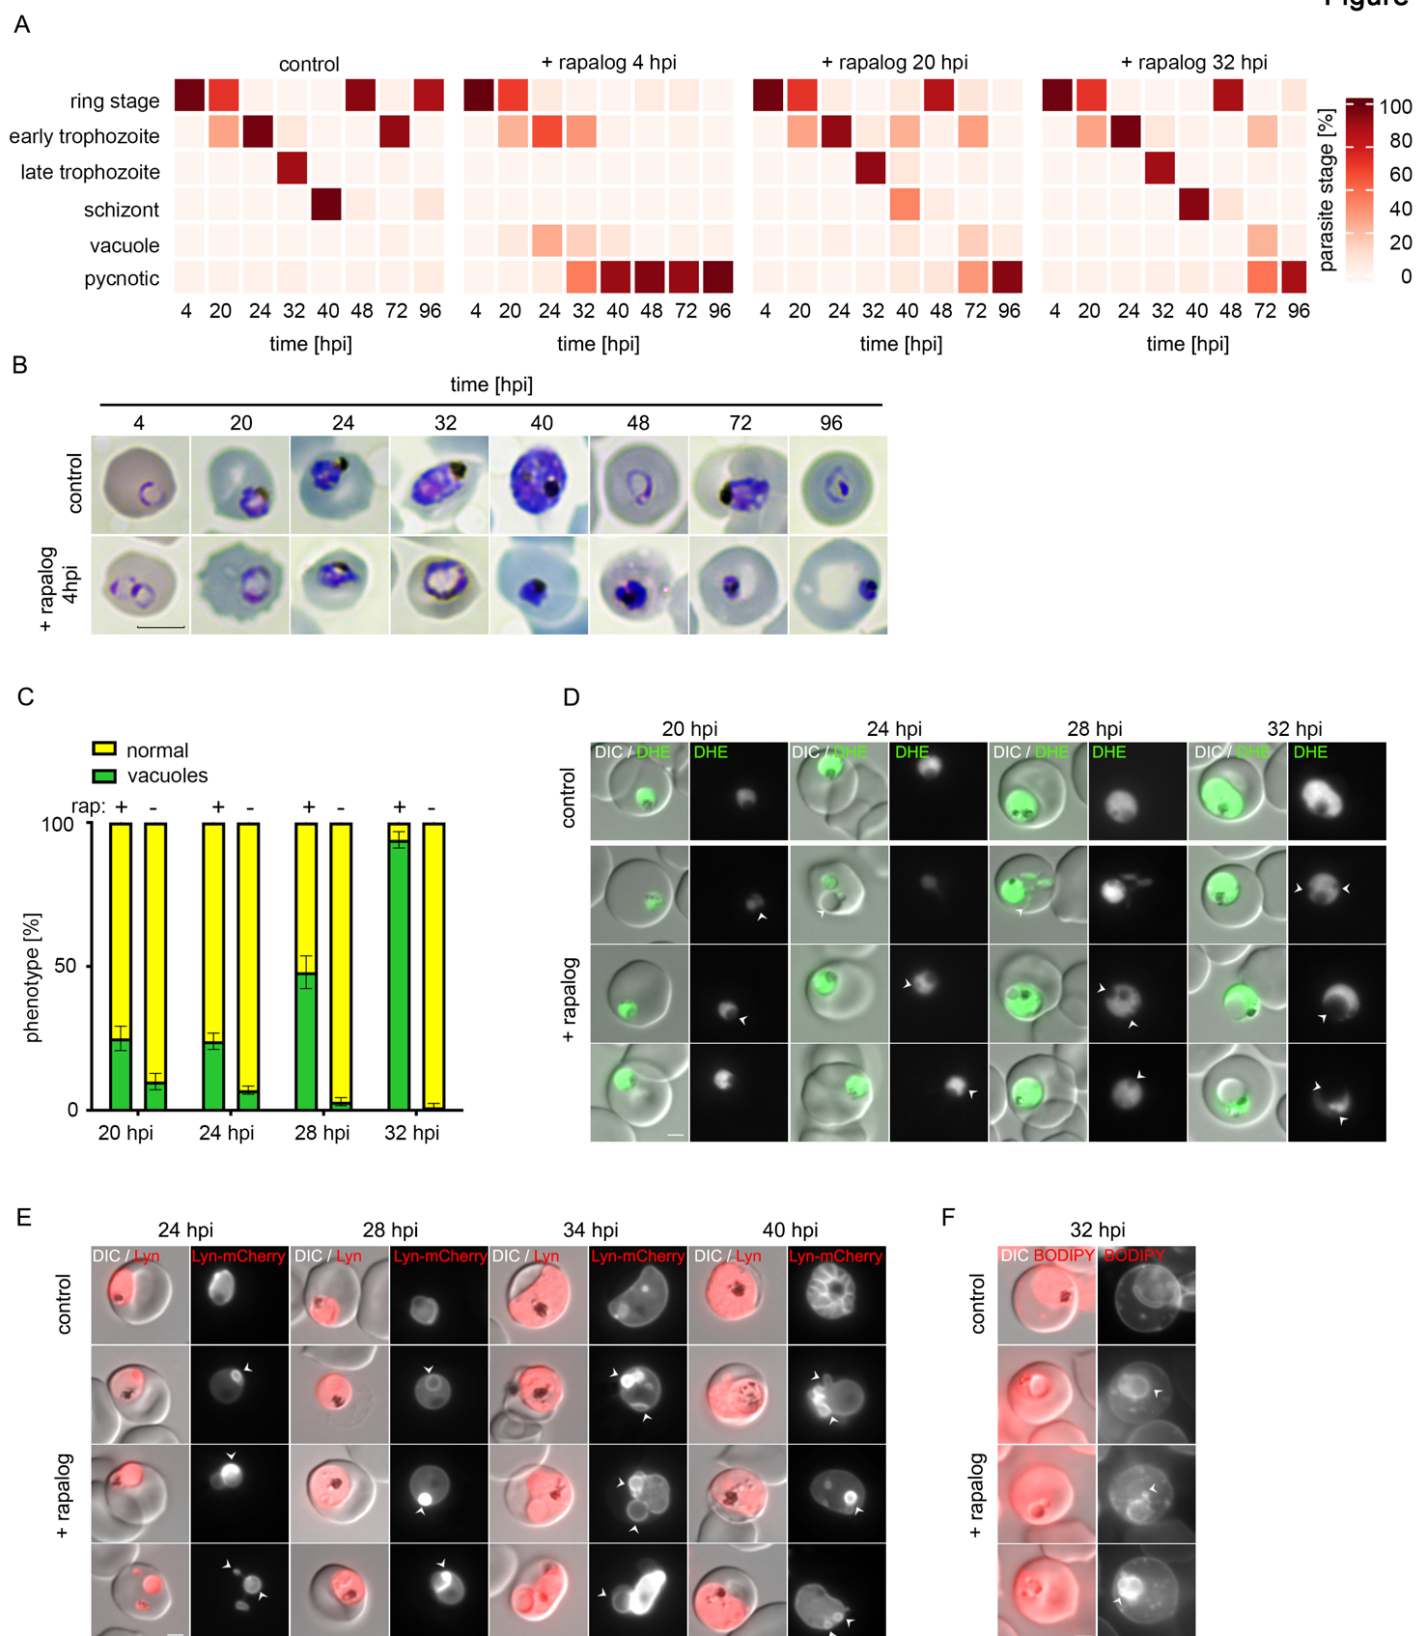

Figure 5

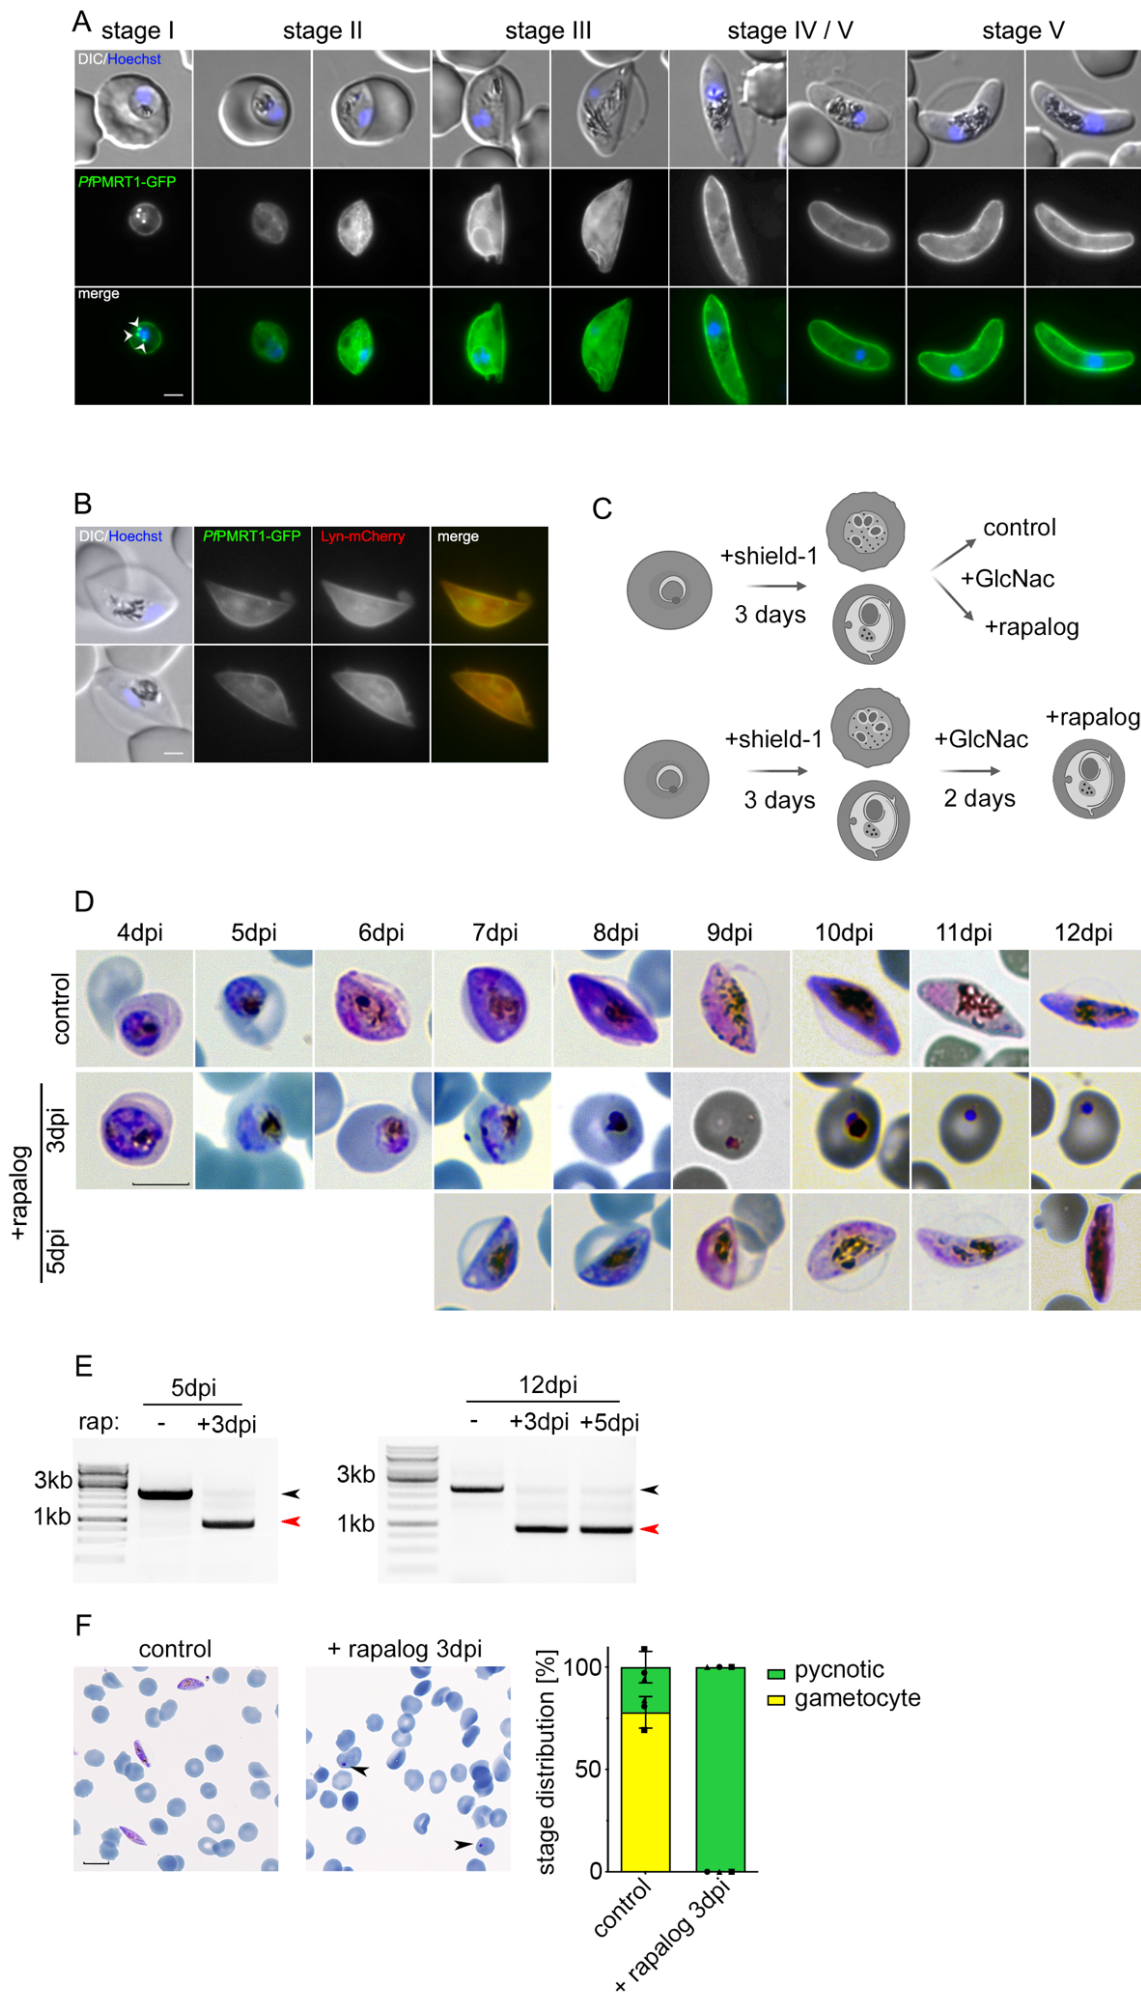

Figure 6

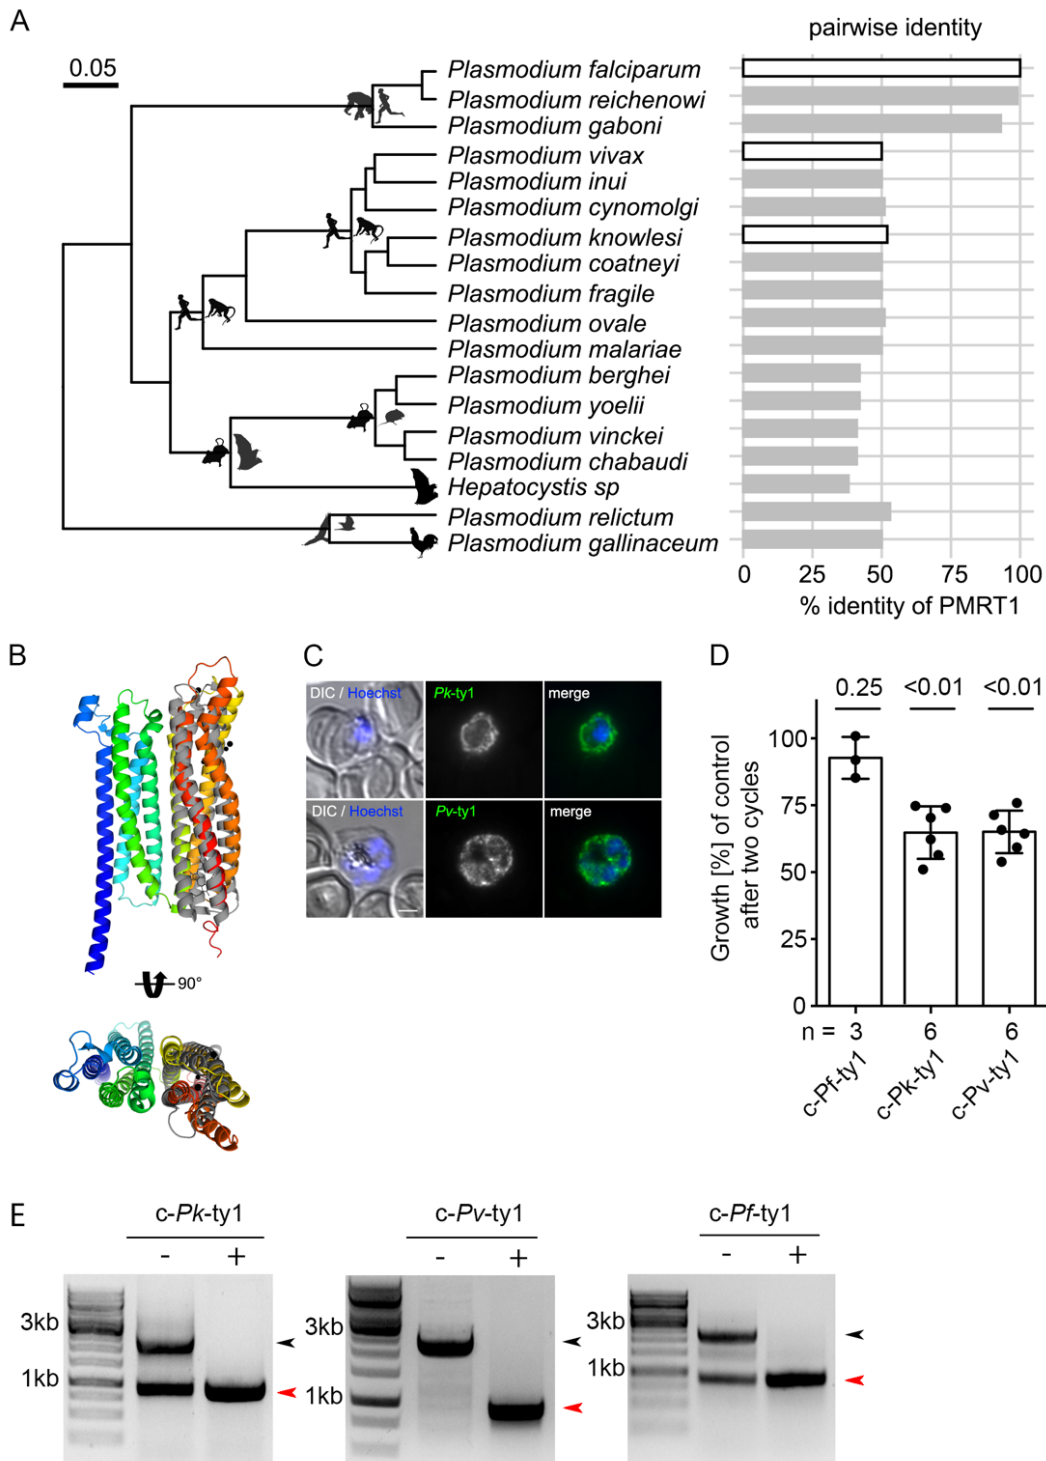

Figure 7

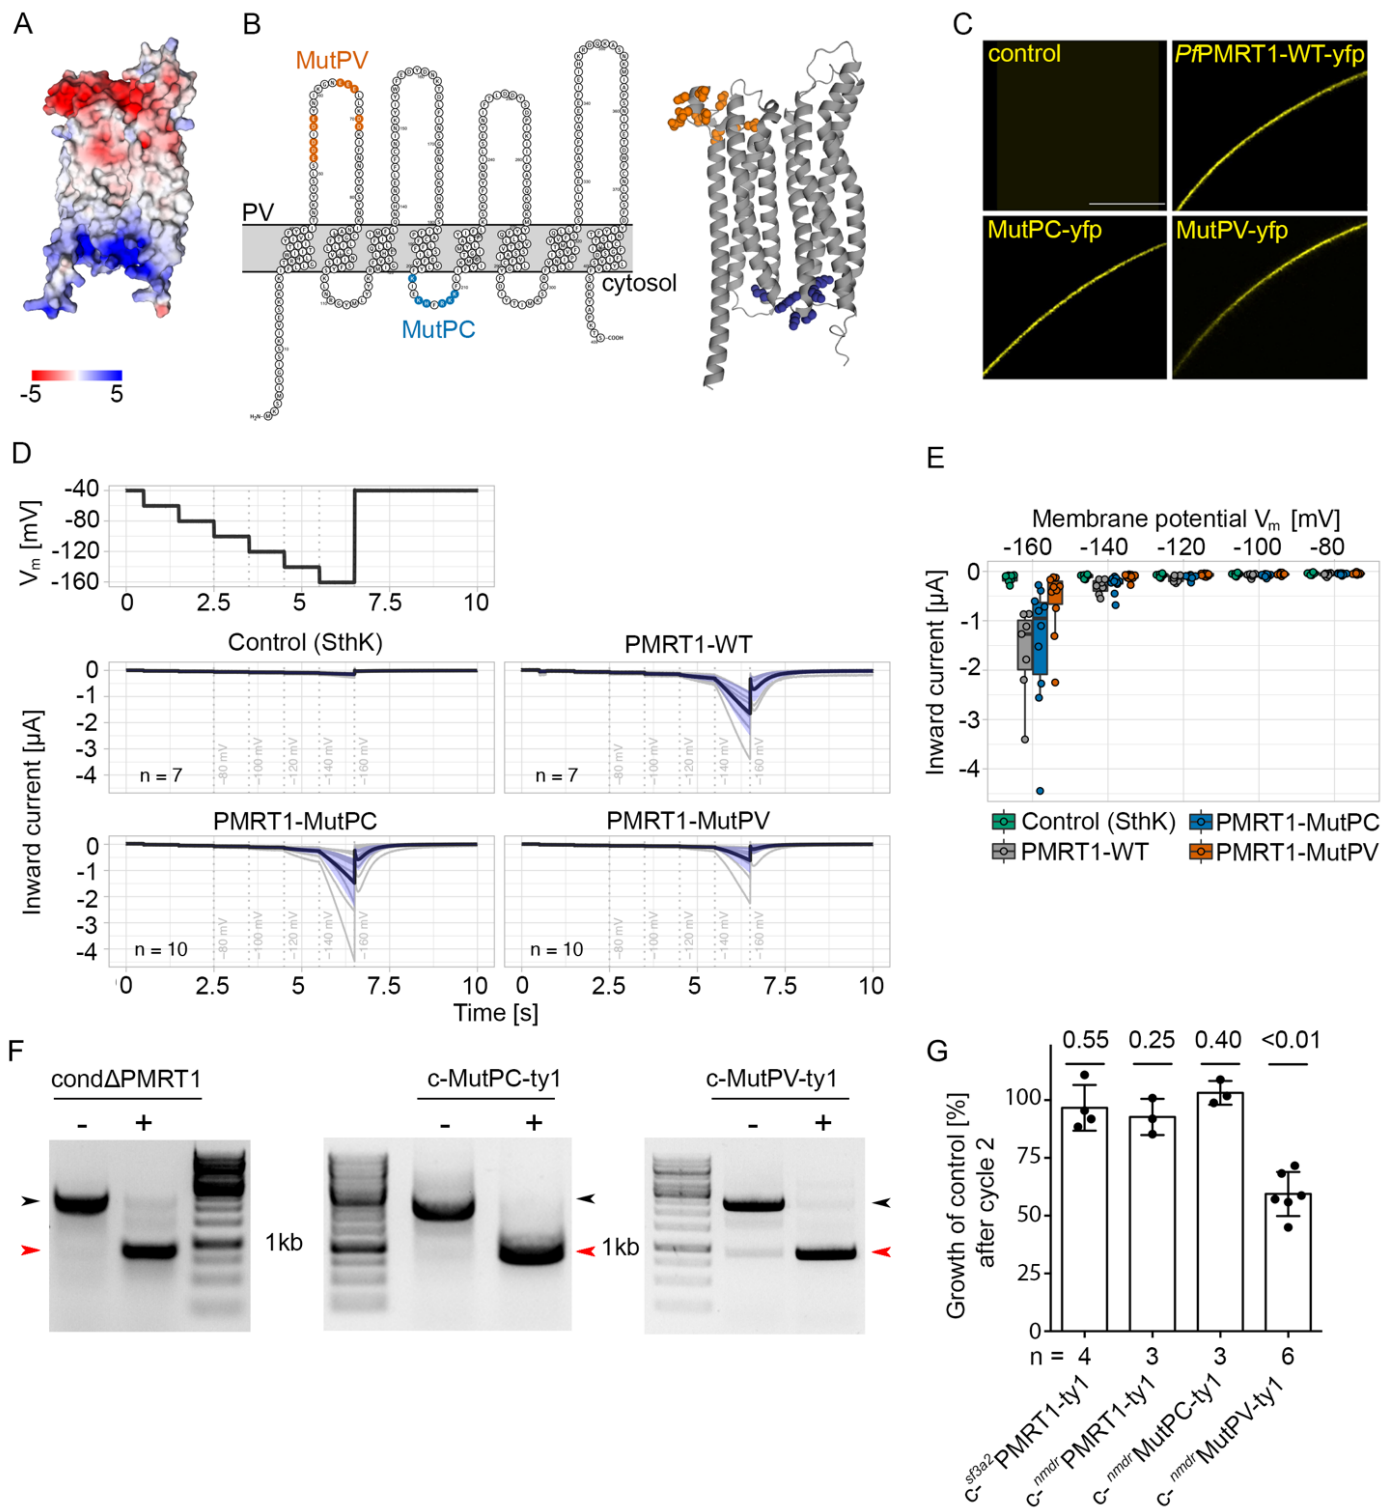

A

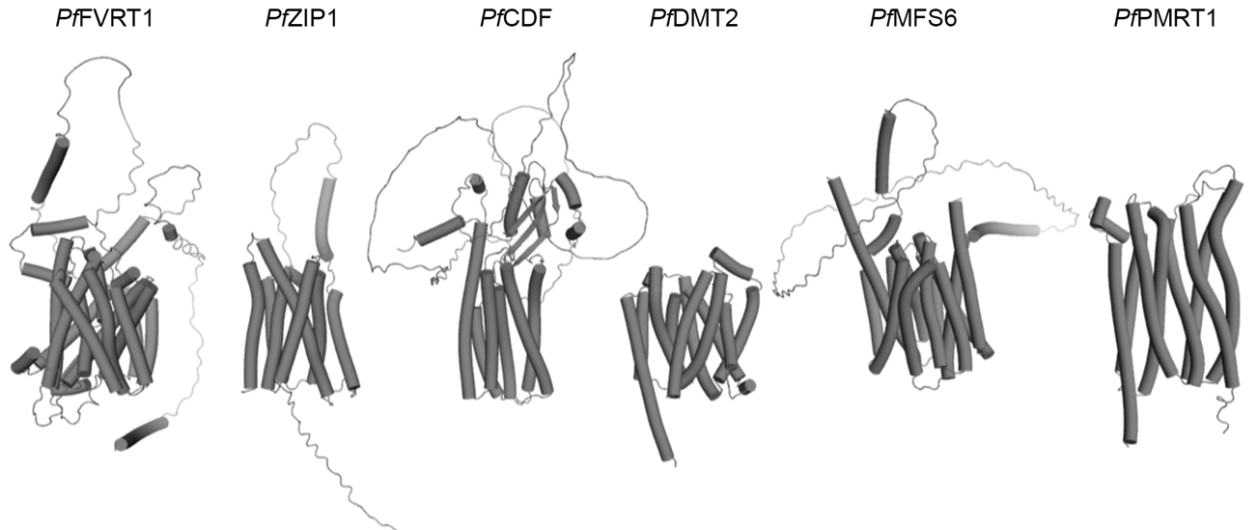

B

|         | hit no. | PDB-chain | Z    | msd | lali | nres | %id | PDB description on <a href="http://www.rcsb.org">www.rcsb.org</a>                                                                             |
|---------|---------|-----------|------|-----|------|------|-----|-----------------------------------------------------------------------------------------------------------------------------------------------|
| PFVRT1  | 1       | 6c3i-A    | 45.9 | 2.0 | 379  | 386  | 21  | Crystal structure of the Deinococcus radiodurans Nramp/MntH divalent transition metal transporter G45R mutant in an inward occluded state     |
|         | 2       | 5m94-A    | 39.9 | 2.6 | 377  | 401  | 24  | Crystal structure of Staphylococcus capitis divalent metal ion transporter (DMT) in complex with nanobody                                     |
|         | 3       | 6ll2-A    | 38.9 | 2.8 | 440  | 494  | 21  | Crystal structure of Eremococcus coleocola manganese transporter in complex with an aromatic bis-isothiourea substituted compound             |
|         | 4       | 6s3k-A    | 25.1 | 3.8 | 357  | 573  | 8   | KimA from Bacillus subtilis in inward-facing, occluded state (APC Family Pemease)                                                             |
|         | 5       | 6cse-C    | 24.7 | 3.4 | 344  | 428  | 13  | Crystal structure of sodium/alanine symporter AgcS with L-alanine bound                                                                       |
| PZIP1   | 1       | 6pgi-A    | 16.1 | 3.6 | 206  | 230  | 15  | Asymmetric functions of a binuclear metal cluster within the transport pathway of the ZIP transition metal transporters                       |
|         | 2       | 7c76-B    | 9.5  | 3.5 | 150  | 483  | 5   | Cryo-EM structure of human TLR3 in complex with UNC93B1                                                                                       |
|         | 3       | 6m2l-A    | 9.0  | 3.6 | 154  | 447  | 6   | Crystal structure of Plasmodium falciparum hexose transporter PfHT1 bound with C3361                                                          |
|         | 4       | 4gbz-A    | 8.9  | 3.6 | 159  | 475  | 7   | The structure of the MFS (major facilitator superfamily) proton:xylose symporter XylE bound to D-glucose                                      |
|         | 5       | 6ob6-B    | 8.8  | 3.6 | 155  | 357  | 12  | Human equilibrative nucleoside transporter-1, S-(4-nitrobenzyl)-6-thioinosine bound, merohedrally twinned                                     |
| PICDF   | 1       | 6xpd-B    | 27.1 | 2.0 | 300  | 303  | 34  | Cryo-EM structure of human ZnT8 double mutant - D110N and D224N, determined in outward-facing conformation                                    |
|         | 2       | 3h90-C    | 18.4 | 2.8 | 268  | 283  | 15  | Structural basis for the autoregulation of the zinc transporter Y1P                                                                           |
|         | 3       | 6vd9-A    | 12.5 | 1.4 | 71   | 73   | 32  | Metal-bound C-terminal domain of the CzcD transporter from Cuprividus metallidurans                                                           |
|         | 4       | 6vd8-B    | 12.3 | 1.3 | 76   | 78   | 37  | Metal-bound C-terminal domain of CzcD transporter from Pseudomonas aeruginosa                                                                 |
|         | 5       | 3w62-A    | 10.3 | 2.0 | 73   | 79   | 14  | MamM-CTD E289A                                                                                                                                |
| PDMT2   | 1       | 6ukj-A    | 26.0 | 3.4 | 291  | 350  | 13  | Single-Particle Cryo-EM Structure of Plasmodium falciparum Chloroquine Resistance Transporter (PfCRT) 7G8 Isoform                             |
|         | 2       | 5o9k-E    | 24.9 | 3.6 | 285  | 298  | 14  | Crystal structure of a nucleotide sugar transporter with bound nucleotide sugar                                                               |
|         | 3       | 6xbo-A    | 24.6 | 3.8 | 275  | 319  | 12  | X-ray crystal structure of the mouse CMP-Sialic acid transporter in complex with 5-methyl CMP                                                 |
|         | 4       | 5i20-D    | 24.0 | 3.1 | 272  | 280  | 9   | Crystal structure of protein (drug metabolite transporter YddG)                                                                               |
|         | 5       | 5y78-A    | 23.9 | 4.0 | 288  | 305  | 14  | Crystal structure of the triose-phosphate/phosphate translocator in complex with inorganic phosphate                                          |
| PFMFS6  | 1       | 6l1z-A    | 36.6 | 3.0 | 366  | 393  | 15  | LmrP from L. lactis, in an outward-open conformation, bound to Hoechst 33342                                                                  |
|         | 2       | 6s4m-A    | 36.1 | 2.3 | 356  | 426  | 17  | Crystal structure of the human organic anion transporter MFS10 (TETTRAN)                                                                      |
|         | 3       | 3wdo-A    | 35.7 | 3.1 | 364  | 453  | 12  | Structure of E. coli YajR transporter                                                                                                         |
|         | 4       | 3o7p-A    | 35.2 | 3.0 | 356  | 410  | 11  | Crystal structure of the E. coli Fucose:proton symporter, FucP (N162A)                                                                        |
|         | 5       | 7ckr-A    | 35.0 | 2.7 | 365  | 382  | 7   | Cryo-EM structure of the human MCT1/Basigin-2 complex in the presence of anti-cancer drug candidate BAY-8002 in the outward-open conformation |
| PFPMRT1 | 1       | 6z0c-A    | 15.5 | 3.3 | 169  | 199  | 4   | Structure of in silico modelled artificial Maquette-3 protein                                                                                 |
|         | 2       | 5vj1-A    | 14.9 | 3.3 | 171  | 196  | 3   | De Novo Photosynthetic Reaction Center Protein Equipped with Heme B and Zn(II) cations                                                        |
|         | 3       | 7p5c-B    | 12.7 | 3.2 | 153  | 392  | 4   | Cryo-EM structure of human TTYH3 in Ca <sup>2+</sup> and GDN (Protein Tweety Homolog 3)                                                       |
|         | 4       | 6njm-E    | 12.5 | 2.0 | 116  | 117  | 0   | Architecture and subunit arrangement of native AMPA receptors (Glutamate-gated AMPA receptor)                                                 |
|         | 5       | 6y90-A    | 12.0 | 3.5 | 140  | 172  | 8   | Structure of full-length CD20 in complex with Rituximab Fab (B-Lymphocyte Antigen CD20)                                                       |

Dali Z score: significance estimate

msd: difference between the rmsd value associated with a protein structure pair and the rmsd value that would have been observed in the case that the two structures had the same crystallographic resolution

lali: number of aligned positions

nres: number of residues in the matched structure

%id: the percentage sequence identity in the match

msd: root-mean-square-deviation over aligned  $\alpha$ -carbon position

Figure S2

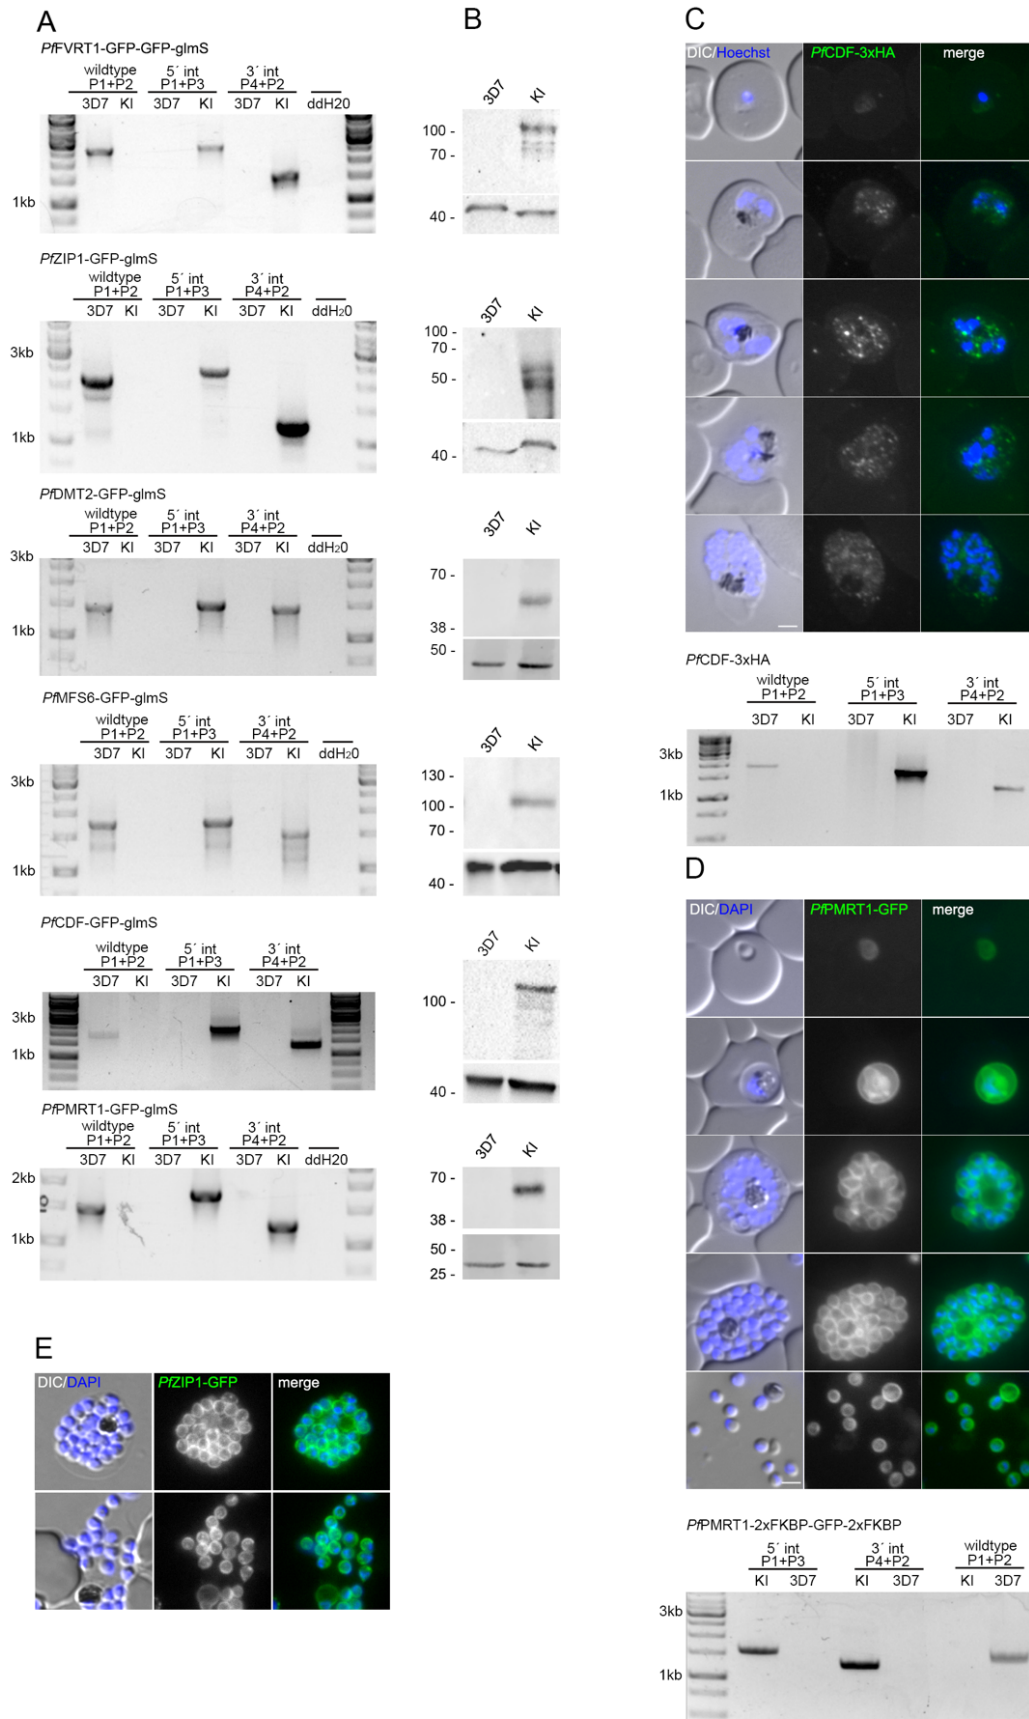

Figure S3

A

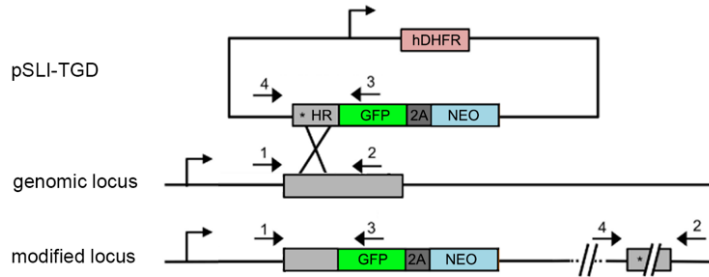

B

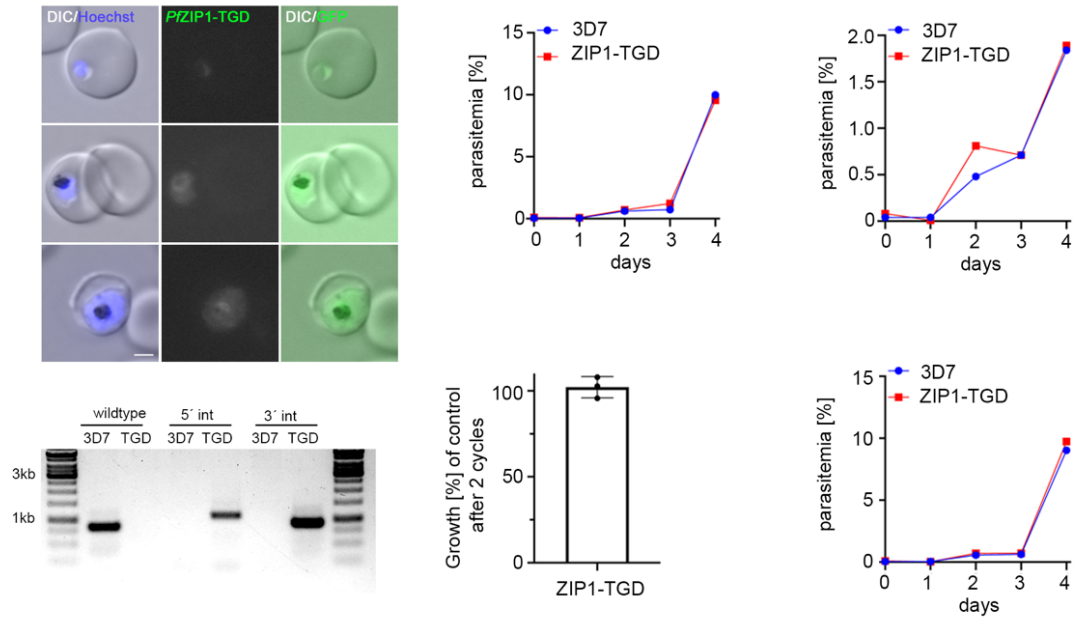

C

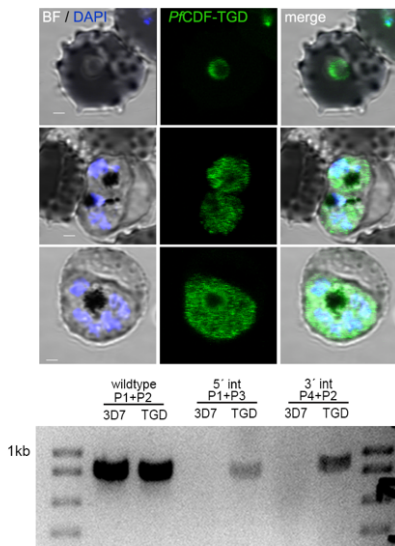

Figure S4

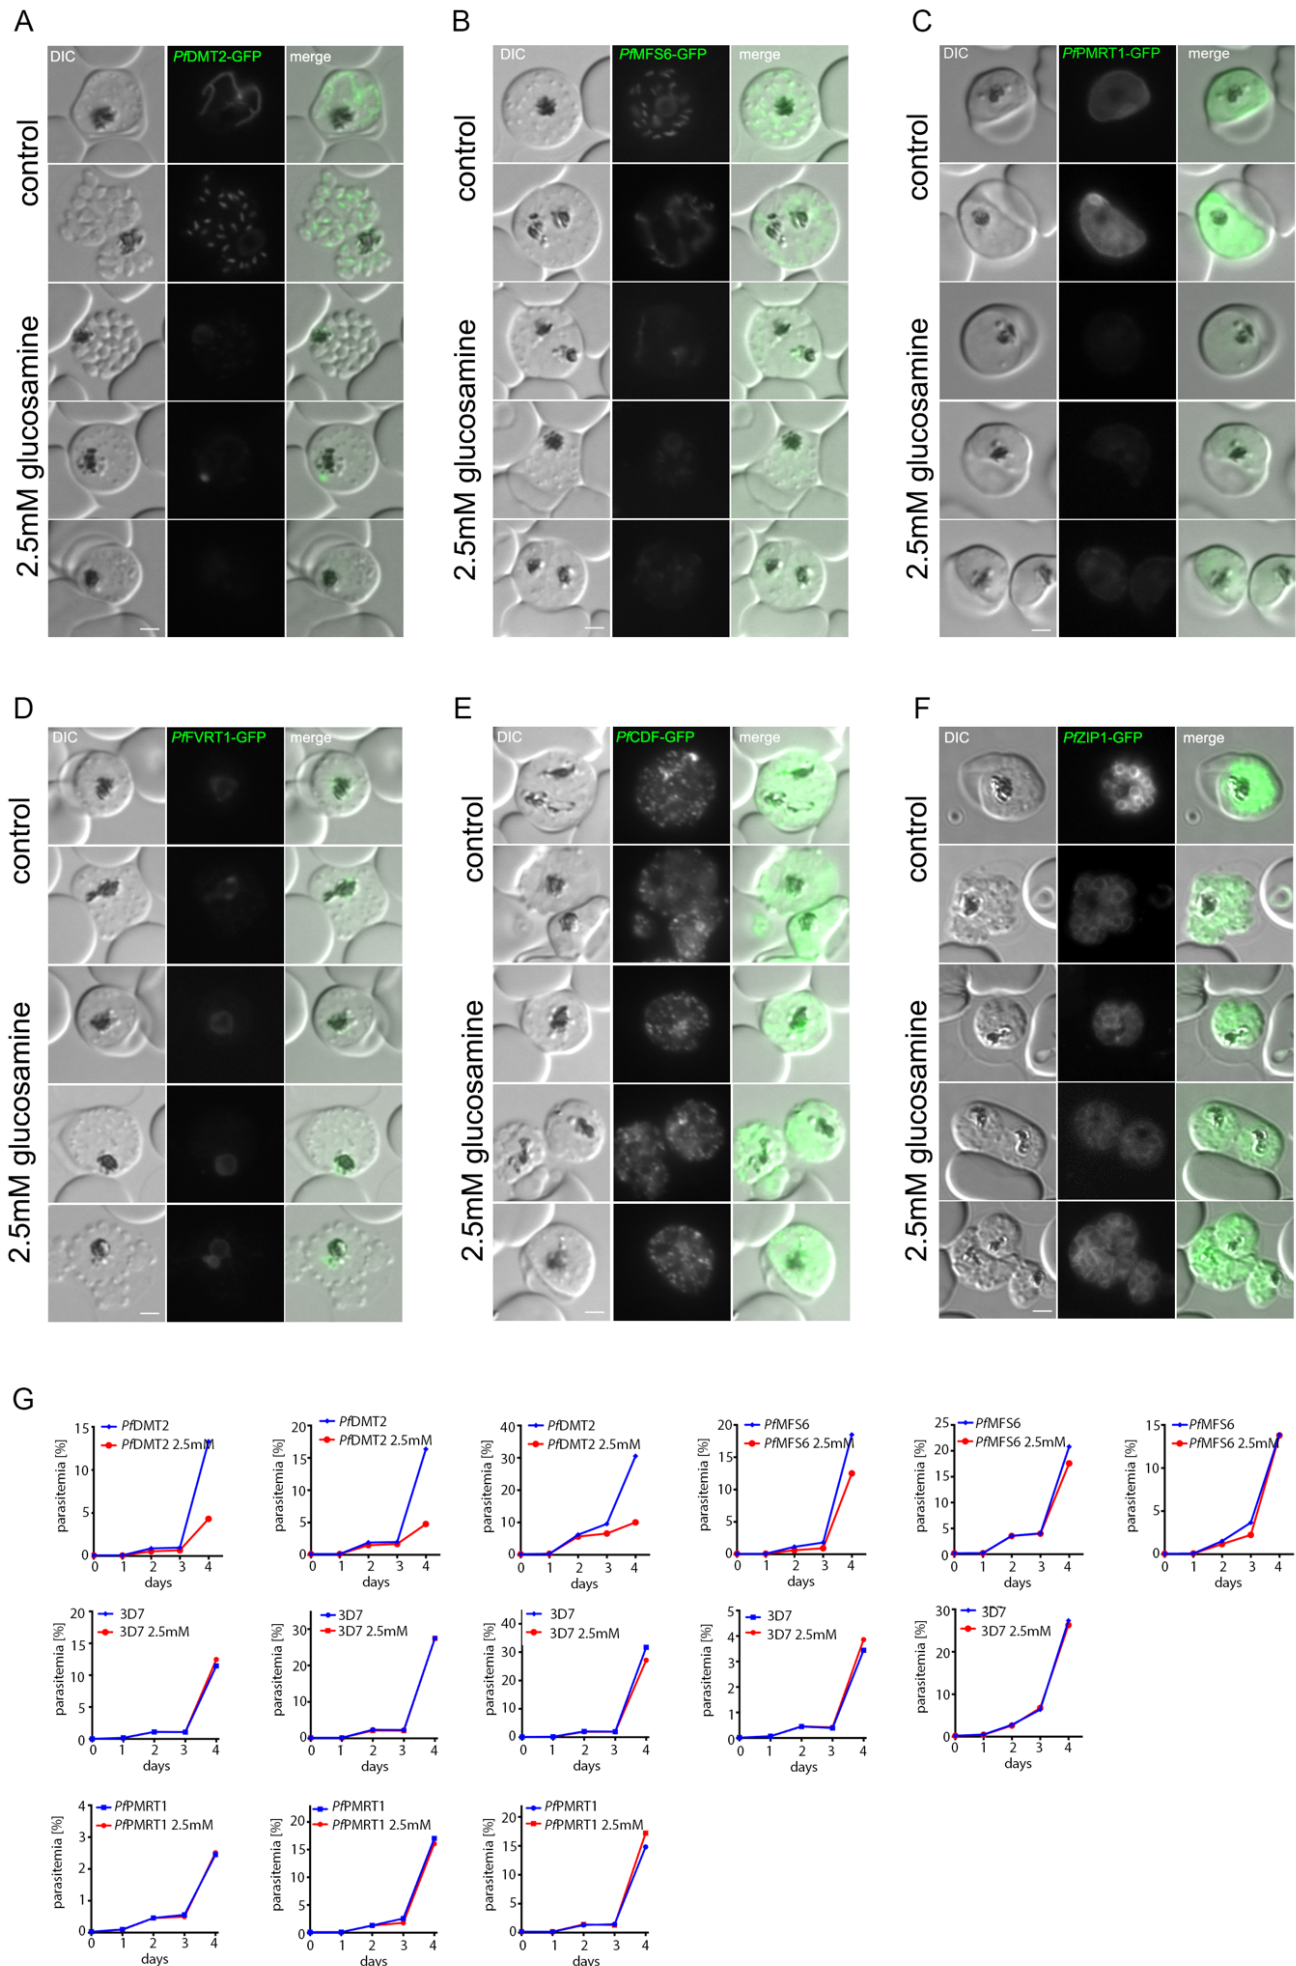



Figure S5

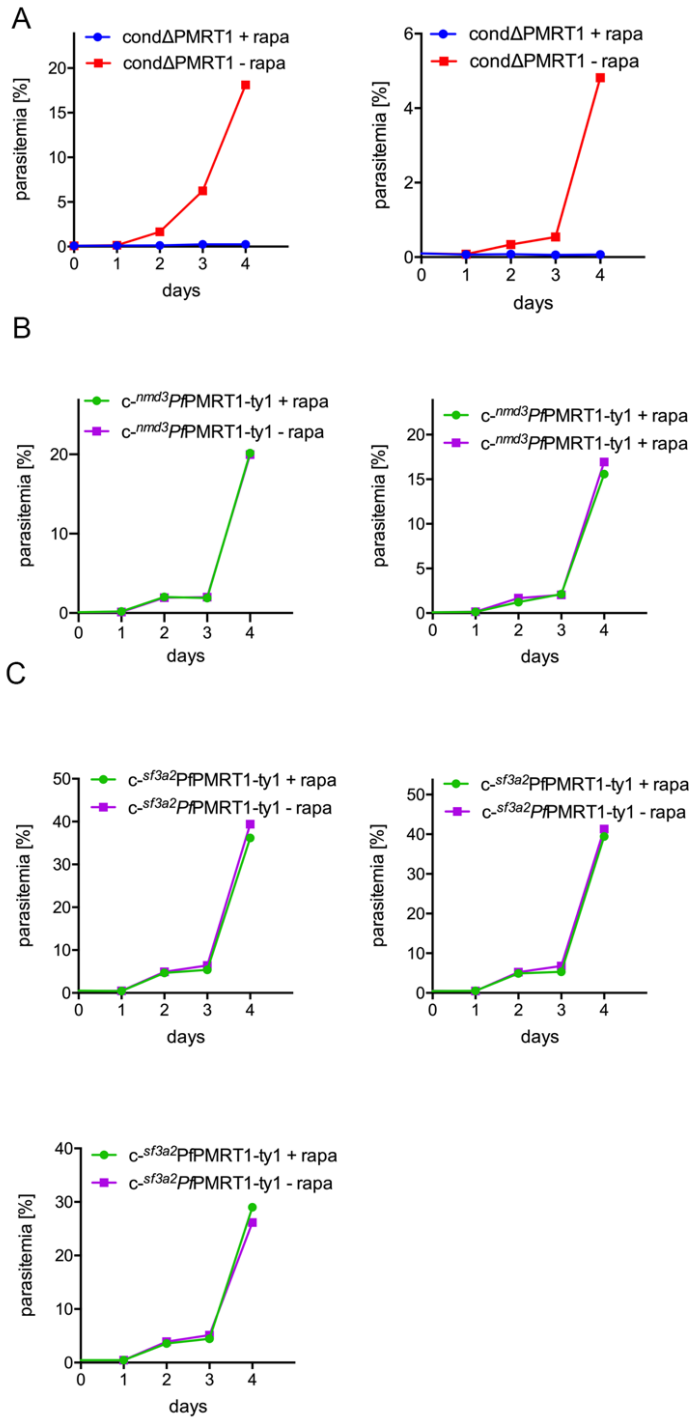

Figure S6

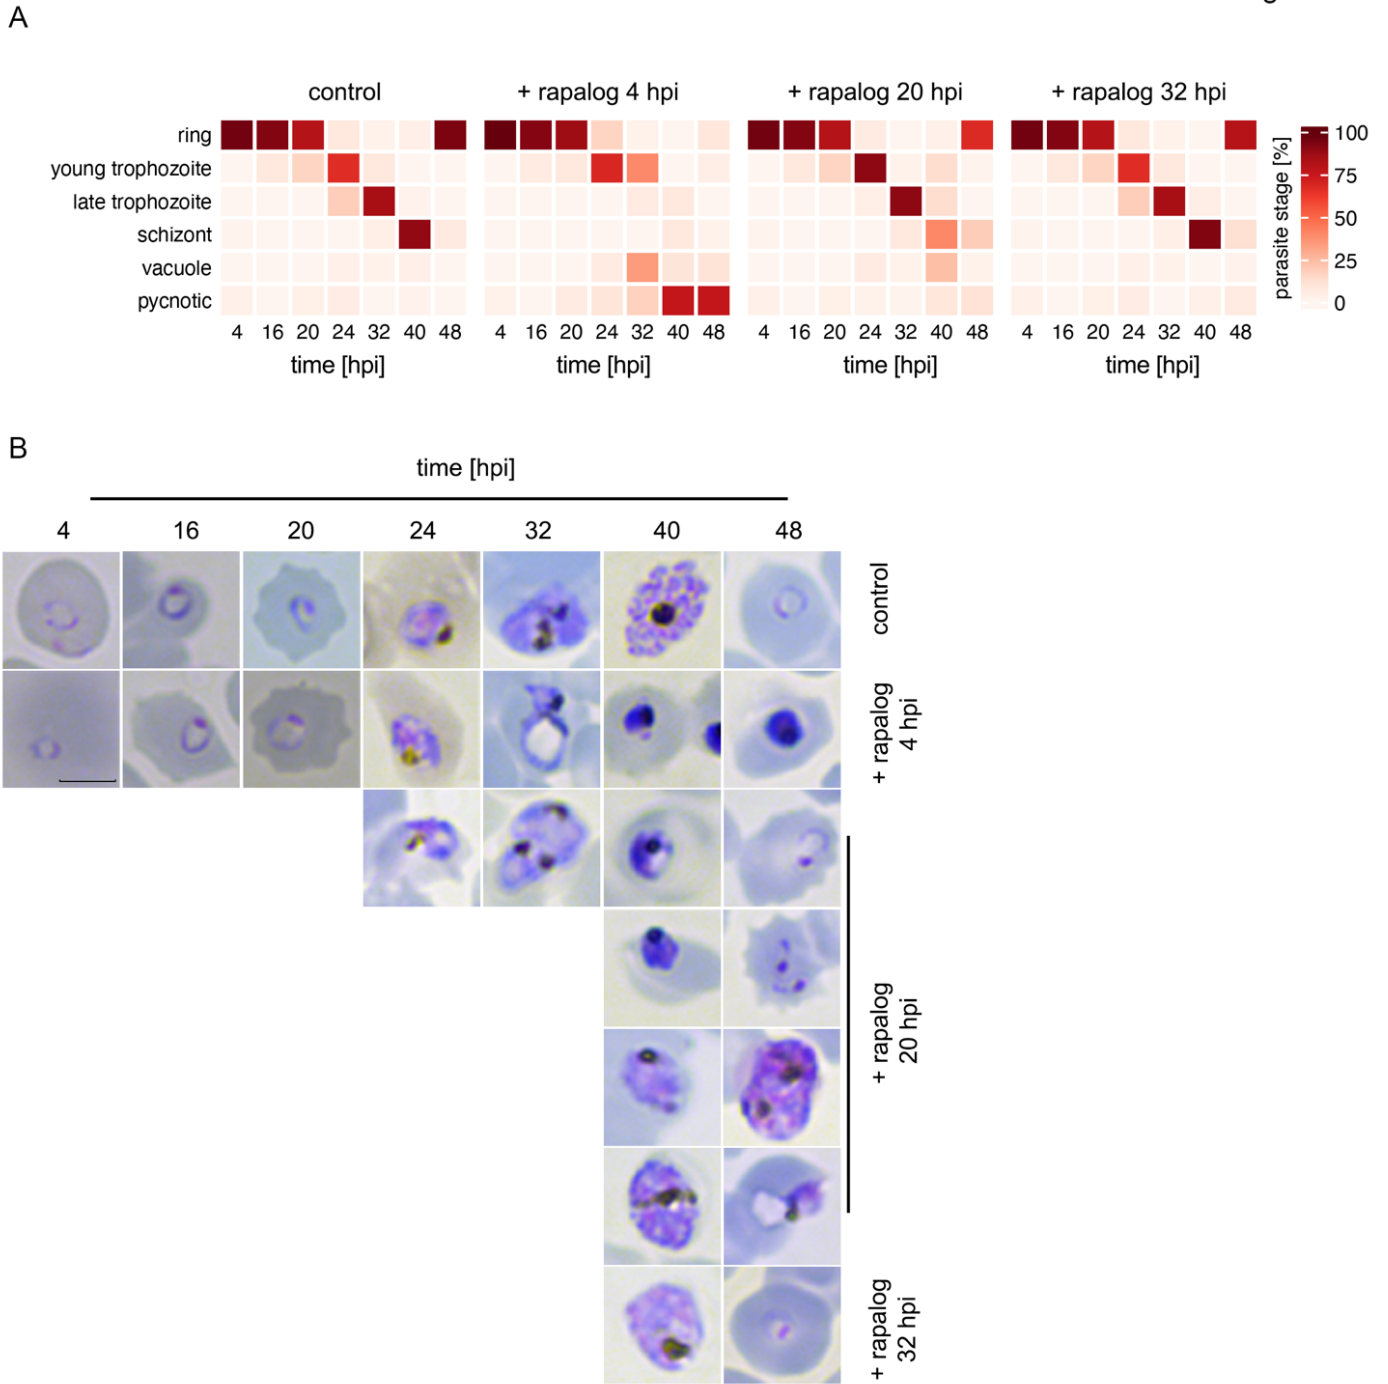

Figure S7

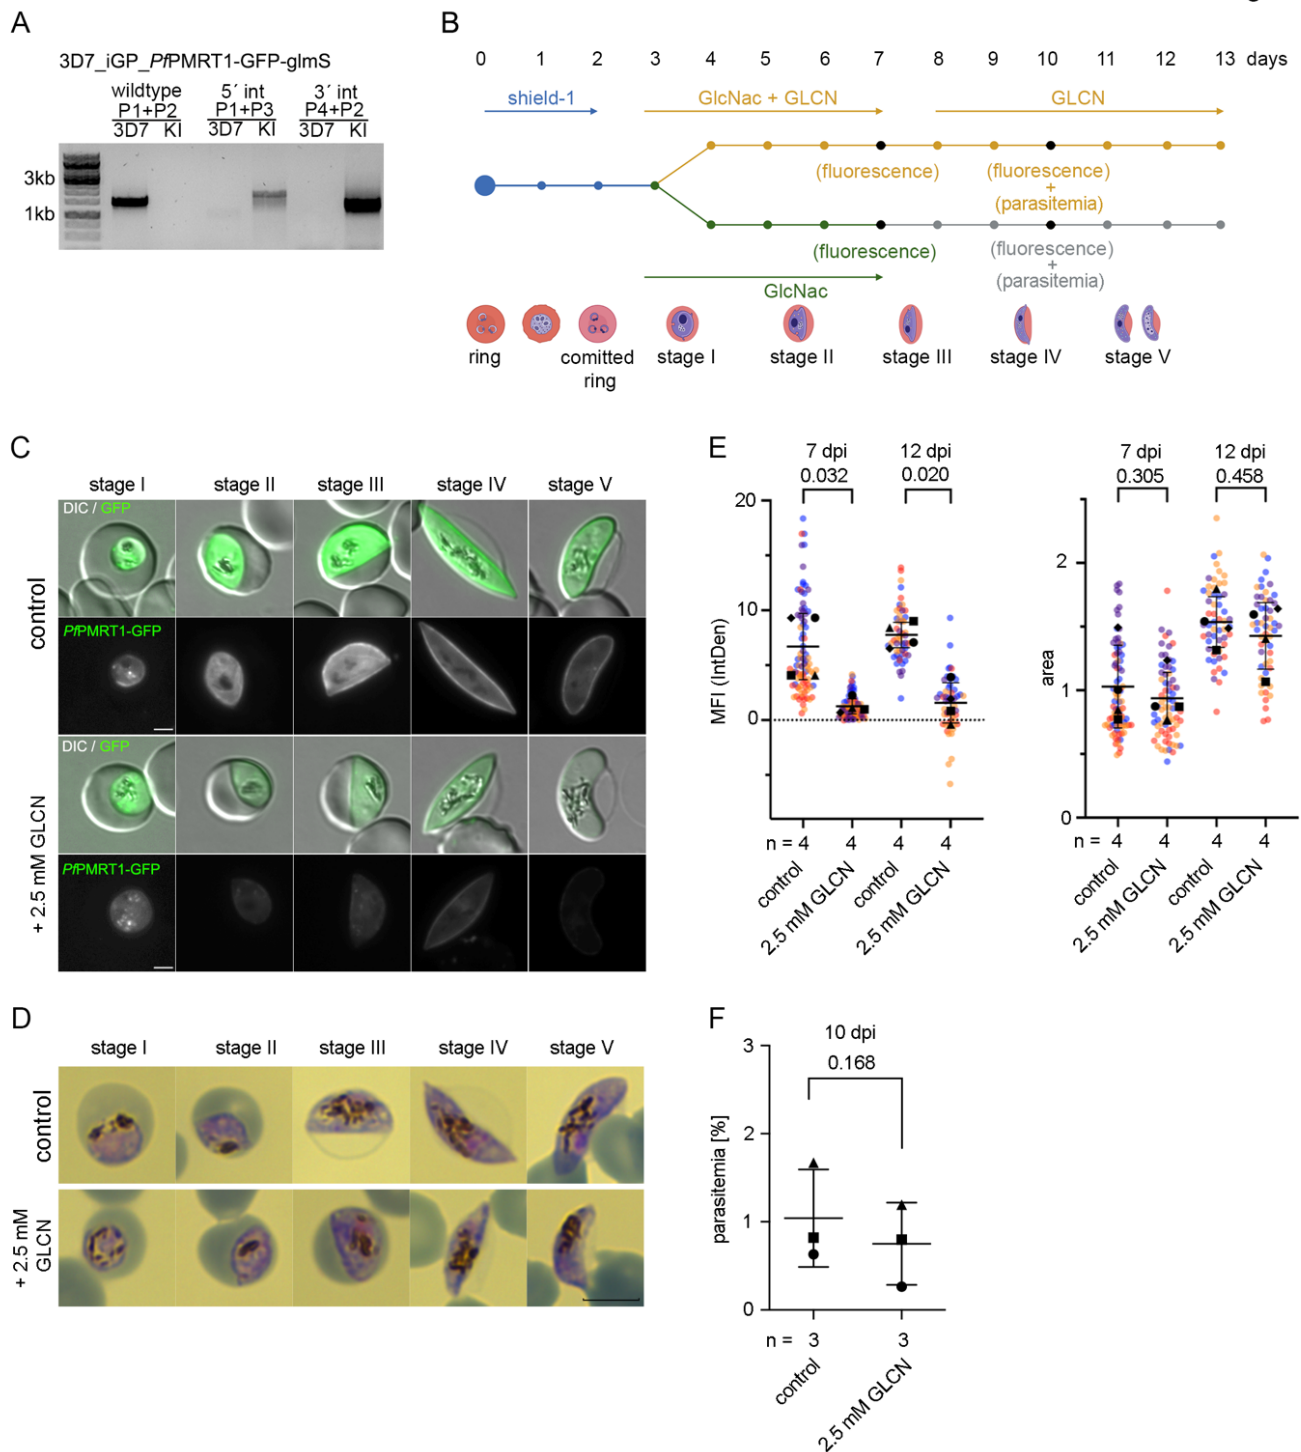

Figure S8

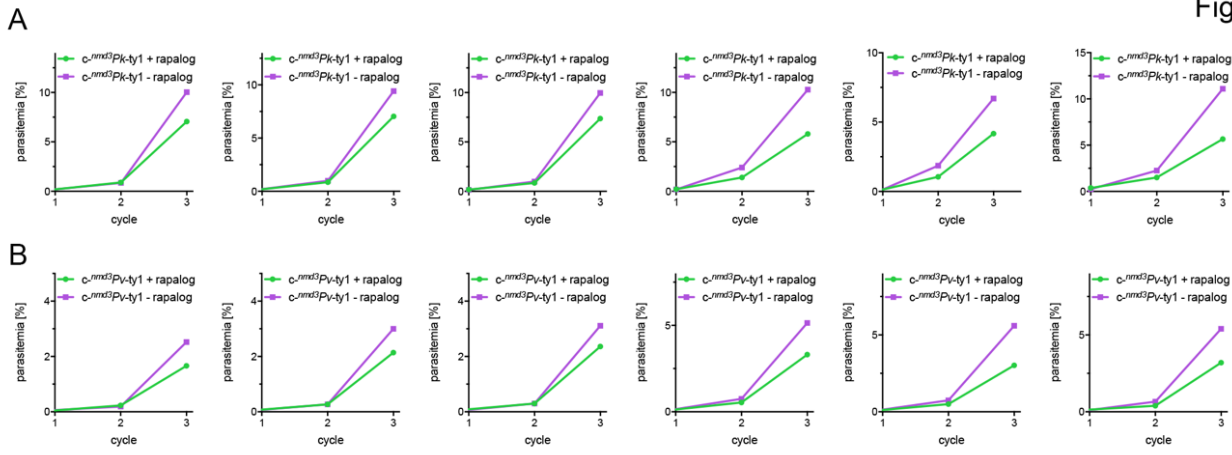

Figure S9

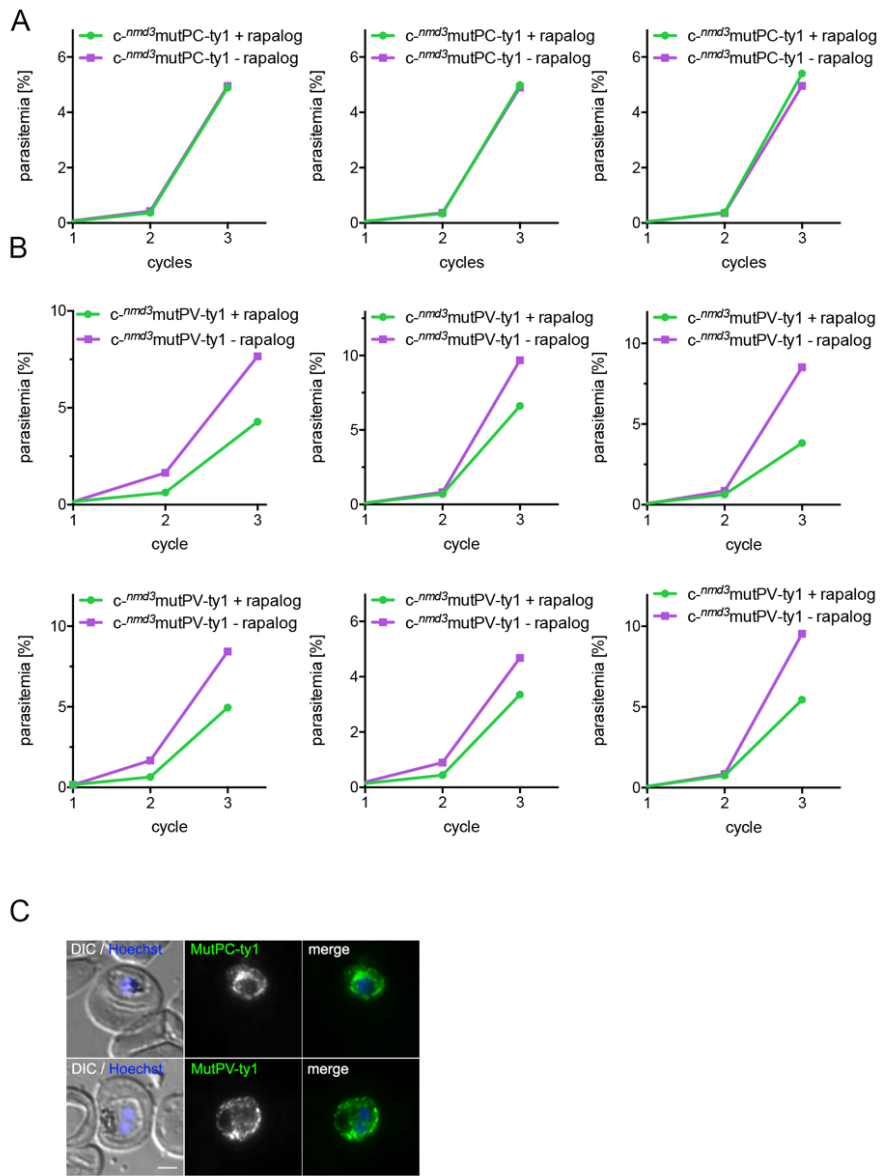

Source: http://biorxiv.org/content/10.1101/2021.12.21.473770v1.full.pdf
