1 **PMRT1, a *Plasmodium* specific parasite plasma membrane transporter is essential for asexual**  
2 **and sexual blood stage development**

3

4 Jan Stephan Wichers<sup>1,2,3</sup>, Paolo Mesén-Ramírez<sup>2</sup>, Gwendolin Fuchs<sup>1,2,3</sup>, Jing Yu-Strzelczyk<sup>4</sup>,  
5 Jan Stäcker<sup>2</sup>, Heidrun von Thien<sup>1,2</sup>, Arne Alder<sup>1,2,3</sup>, Isabelle Henshall<sup>5</sup>, Benjamin Liffner<sup>5</sup>,  
6 Georg Nagel<sup>4</sup>, Christian Löw<sup>1,6</sup>, Danny Wilson<sup>5,7</sup>, Tobias Spielmann<sup>2</sup>, Shiqiang Gao<sup>4</sup>, Tim-  
7 Wolf Gilberger<sup>1,2,3,#</sup>, Anna Bachmann<sup>1,2,3,&</sup>, Jan Strauss<sup>1,2,3,6,#,&†</sup>

8

9 <sup>1</sup>Centre for Structural Systems Biology, 22607 Hamburg, Germany.

10 <sup>2</sup>Bernhard Nocht Institute for Tropical Medicine, 20359 Hamburg, Germany.

11 <sup>3</sup>Biology Department, University of Hamburg, 20146, Hamburg, Germany

12 <sup>4</sup>Institute of Physiology, Department of Neurophysiology, Biocenter, University of Wuerzburg,  
13 97070 Würzburg, Germany

14 <sup>5</sup>Research Centre for Infectious Diseases, School of Biological Sciences, University of  
15 Adelaide, Adelaide 5005, Australia.

16 <sup>6</sup>European Molecular Biology Laboratory, Hamburg Unit, Hamburg, Germany

17 <sup>7</sup>Burnet Institute, 85 Commercial Road, Melbourne 3004, Victoria, Australia.

18

19 #Corresponding authors: [gilberger@bnitm.de](mailto:gilberger@bnitm.de), [jan.strauss@geomar.de](mailto:jan.strauss@geomar.de)

20 &Contributed equally

21 †Present address: GEOMAR Helmholtz Centre for Ocean Research Kiel, 24105 Kiel,  
22 Germany

23

24 ORCID:

25 Jan Stephan Wichers: 0000-0002-0599-1742

26 Paolo Mesén-Ramírez: 0000-0001-7842-5867

27 Jing Yu-Strzelczyk: 0000-0002-7576-6831

28 Gwendolin Fuchs: 0000-0001-9294-6984

29 Jan Stäcker: 0000-0002-4738-6639

30 Arne Alder: 0000-0003-4918-4640

31 Isabelle Henshall: 0000-0002-5906-0687

32 Benjamin Liffner: 0000-0002-1573-6139

33 Danny Wilson: 0000-0002-5073-1405

34 Georg Nagel: 0000-0001-8174-8712

35 Christian Löw: 0000-0003-0764-7483

36 Tobias Spielmann: 0000-0002-3968-4601

37 Shiqiang Gao: 0000-0001-6190-9443

38 Tim-Wolf Gilberger: 0000-0002-7965-8272

39 Anna Bachmann: 0000-0001-8397-7308

40 Jan Strauss: 0000-0002-6208-791X

41

42

43 **Abstract**

44 Membrane transport proteins perform crucial roles in cell physiology. The obligate intracellu-  
45 lar parasite *Plasmodium falciparum*, an agent of human malaria, relies on membrane  
46 transport proteins for the uptake of nutrients from the host, disposal of metabolic waste, ex-  
47 change of metabolites between organelles and generation and maintenance of  
48 transmembrane electrochemical gradients for its growth and replication within human eryth-  
49 rocytes. Despite their importance for *Plasmodium* cellular physiology, the functional roles of a  
50 number of membrane transport proteins remain unclear, which is particularly true for orphan  
51 membrane transporters that have no or limited sequence homology to transporter proteins in  
52 other evolutionary lineages. Therefore, in the current study, we applied endogenous tagging,  
53 targeted gene disruption, conditional knockdown and knockout approaches to investigate the  
54 subcellular localization and essentiality of six membrane transporters during intraerythrocytic  
55 development of *P. falciparum* parasites. They are localized at different subcellular structures  
56 – the food vacuole, the apicoplast, and the parasite plasma membrane – and four out of the  
57 six membrane transporters are essential during asexual development. Additionally, the  
58 plasma membrane resident transporter 1 (PMRT1, PF3D7\_1135300), a unique *Plasmodium*-  
59 specific plasma membrane transporter, was shown to be essential for gametocytogenesis  
60 and functionally conserved within the genus *Plasmodium*. Overall, we reveal the importance  
61 of four orphan transporters to blood stage *P. falciparum* development, which have diverse  
62 intracellular localizations and putative functions.

63 **Importance (150 words)**

64 *Plasmodium falciparum*-infected erythrocytes possess multiple compartments with designat-  
65 ed membranes. Transporter proteins embedded in these membranes do not only facilitate  
66 movement of nutrients, metabolites and other molecules between these compartments, but  
67 are common therapeutic targets and can also confer antimalarial drug resistance. Orphan  
68 membrane transporter in *P. falciparum* without sequence homology to transporters in other  
69 evolutionary lineages and divergent to host transporters may constitute attractive targets for  
70 novel intervention approaches. Here, we localized six of these putative transporters at differ-  
71 ent subcellular compartments and probed into their importance during asexual parasite  
72 growth using reverse genetic approaches. In total, only two candidates turned out to be dis-  
73 pensable for the parasite, highlighting four candidates as putative targets for therapeutic in-  
74 terventions. This study reveals the importance of several orphan transporters to blood stage  
75 *P. falciparum* development.

76 **Introduction**

77 *Plasmodium* spp. malaria parasites inhabit diverse intracellular niches and need to import  
78 nutrients and export waste across both, host-cell and parasite membranes. Despite this,

79 there are less than 150 putative membrane transporters encoded in the genome of *Plasmo-*  
80 *dium falciparum*, the most virulent malaria parasite, making up only 2.5% of all encoded  
81 genes (*P. falciparum* 3D7 v3.2: 5280 genes) (1–8), which is reduced compared to other uni-  
82 cellular organisms of similar genome size. The loss of redundant transporters is a typical  
83 feature of many intracellular parasites (9) and, as a result, the proportion of transporters that  
84 are indispensable for parasite survival increases (2), some of which have been shown to be  
85 critical for the uptake of several anti-Plasmodial compounds and/or to be involved in drug  
86 resistance (10–23). Moreover, the parasite’s intracellular lifestyle resulted in the evolution of  
87 additional specialized transporters without human homologues (1). During its  
88 intraerythrocytic development, the parasite relies on the uptake of nutrients, such as amino  
89 acids, pantothenate or fatty acids, from its host erythrocyte as well as from the extracellular  
90 blood plasma (24–27). As *P. falciparum* resides in a parasitophorous vacuole (PV) in the  
91 host erythrocyte, nutrients acquired from the extracellular milieu must traverse multiple  
92 membranes: the erythrocyte plasma membrane (EPM), the parasitophorous vacuole mem-  
93 brane (PVM), the parasite plasma membrane (PPM) and eventually membranes of intracellu-  
94 lar organelles, such as those of the apicoplast or mitochondria (24, 28–30). The unique re-  
95 quirements of malaria parasite survival have led to the evolution of a number of orphan  
96 transporters, whose localization or function cannot be predicted based on sequence homolo-  
97 gy to transporters in other organisms (4, 31). Despite the likely importance of uniquely  
98 adapted transporters to *P. falciparum* survival, subcellular localization, essentiality, function  
99 and substrate specificity for most *P. falciparum* transporters has not been directly determined  
100 (2, 24, 29). The best functional evidence available for many *Plasmodium*-specific transport-  
101 ers comes from a recent knockout screen of these orphan transporters in the rodent malaria  
102 parasite *Plasmodium berghei* (31). However, whether observations for different transporters  
103 in the *P. berghei* model are directly transferrable to *P. falciparum* have yet to be examined.  
104 Therefore, in this study, we explored the localization and essentiality of four predicted orphan  
105 transporters that had been partially characterised in *P. berghei* and included two additional  
106 transporters with no experimental characterization available.

## 107 **Results**

108 To date, the predicted ‘transportome’ of *P. falciparum* consists of 117 putative transport sys-  
109 tems (encoded by 144 genes) classified as channels (n=19), carriers (n=69), and pumps  
110 (n=29) (2). Functions of the vast majority of transporter genes were inferred from sequence  
111 homology to model organisms, however, given their lack of homology, 39 gene products  
112 could not be associated with any functional or subcellular localization and were categorized  
113 as orphan transporters accordingly (4). A subset of orphan transporters characterized in the  
114 *P. berghei* malaria model was selected for further characterization in *P. falciparum*. The four  
115 transporters selected were reported to be important at different stages of rodent malaria par-

116 asite growth with i) *P. berghei* drug/metabolite transporter 2 (*PfDMT2*: PF3D7\_0716900)  
117 found to be essential for asexual blood stage development, ii) *P. berghei* zinc transporter 1  
118 (*PfZIP1*: PF3D7\_0609100) was essential across transmission stages but not blood stages,  
119 where there was only a slight growth defect, iii) *P. berghei* cation diffusion facilitator family  
120 protein (*PfCDF*: PF3D7\_0715900) knockout parasites had a defect during transmission stag-  
121 es but not during asexual stages, and iv) *P. berghei* major facilitator superfamily domain-  
122 containing protein (*PfMFS6*: PF3D7\_1440800) was found to be essential for parasite trans-  
123 mission from mosquitos to a new host, with a growth defect observed at asexual and game-  
124 tocyte stages but not during mosquito stage parasite growth (31, 32). In order to confirm ex-  
125 pression of these four, initially selected, transporters in *P. falciparum* asexual stages, we  
126 searched the list of “Genes coding for transport proteins” included in the Malaria Parasite  
127 Metabolic Pathways (MPMP) database (1, 33) for proteins with i) RNA-seq (34, 35) and ii)  
128 proteomics evidence (36, 37) in asexual blood stages. During our initial searches of the  
129 MPMP database but also including PlasmoDB (38) and the most recent *P. falciparum* 3D7  
130 genome (v3.2) and annotations, we identified two additional putative transporters in *P. faldi-*  
131 *parum* (PF3D7\_0523800, PF3D7\_1135300), whose *P. berghei* homologs were not targeted  
132 and functionally characterized by Kenthirapalan *et al.* (31) or investigated in any other exper-  
133 imental model. Given their obvious lack of sequence homology to transporter proteins in oth-  
134 er evolutionary lineages and clear classification as orphan membrane transporter, both pro-  
135 teins were subsequently included in our characterization of *P. falciparum* orphan transport-  
136 ers, and named as ‘food vacuole resident transporter 1’ (FVRT1: PF3D7\_0523800) and as  
137 ‘plasma membrane resident transporter 1’ (PMRT1: PF3D7\_1135300) based on their subcel-  
138 lular localization. AlphaFold-based structure predictions (39) and results from structure ho-  
139 mology search (40) of all six selected transporters are provided in **Figure S1**.

#### 140 **Localization of putative *P. falciparum* transporters**

141 To determine subcellular localization, we tagged the six putative transporters endogenously  
142 with GFP using the selection-linked integration (SLI) system (41) (**Figure 1A**). Additionally, a  
143 glmS ribozyme sequence was included in the 3’UTR, which enabled conditional gene knock-  
144 down upon addition of glucosamine (42). Correct integration of the plasmid into the respec-  
145 tive genomic locus was verified by PCR and expression of the GFP-fusion protein was con-  
146 firmed by Western blot for each generated cell line (**Figure S2A, B**).

147 All transgenic cell lines expressed the GFP-fusion protein, demonstrating that these trans-  
148 porters are expressed in asexual blood stage parasites (**Figure 1B-G, S2A**). Expression lev-  
149 els were sufficient to allow determination of subcellular localization (**Figure 1B-G**): (i)  
150 PF3D7\_0523800-GFP localized to the food vacuole, (ii) *PfDMT2*-GFP and *PfMFS6*-GFP  
151 apicoplast localization, and (iii) *PfZIP1*-GFP and PF3D7\_1135300-GFP parasite plasma  
152 membrane (PPM) localization. However, *PfCDF*-GFP showed an obscure staining pattern

153 with a weak spot within the parasite cytosol in ring and trophozoite stage parasites, but multi-  
154 ple foci in schizont stages (Figure 1D). To pinpoint this localization, an additional cell line with  
155 endogenously 3xHA-tagged *PfCDF* was generated, confirming the focal localization of  
156 *PfCDF* in asexual stages (Figure S2C).

157 Except for *PfCDF*, the observed localizations of the other five transporters were confirmed by  
158 co-localization studies using appropriate episomally expressed marker proteins: P40PX-  
159 mCherry (43, 44) for the food vacuole, ACP-mCherry (45, 46) for apicoplast and Lyn-  
160 mCherry (41, 47) for PPM. The focal distribution of *PfCDF*-GFP was co-localized with a  
161 rhoptry (ARO-mCherry (48, 49)) and a micronemes (AMA1-mCherry (50, 51)) marker, but  
162 *PfCDF*-GFP did not colocalize with either marker (Figure 1H). Additionally, for *PfZIP* and  
163 PF3D7\_1135300 the PPM localization was further confirmed in free merozoites (Figure S2D,  
164 E) and by confocal microscopy-based co-localization of PF3D7\_1135300-GFP with the PPM  
165 marker Lyn-mCherry (Figure S2F). Accordingly, as noted above, we named PF3D7\_0523800  
166 as 'food vacuole resident transporter 1' (FVRT1) and PF3D7\_1135300 as 'plasma mem-  
167 brane resident transporter 1' (PMRT1).

#### 168 **Targeted-gene disruption (TGD), conditional knockdown and conditional knockout of** 169 **putative transporters**

170 In order to test whether the putative transporters are essential for *P. falciparum* during its  
171 intraerythrocytic cycle, we first tried to functionally inactivate them by targeted gene disrup-  
172 tion (TGD) using the SLI system (41) (Figure S3A). TGD cell lines were successfully ob-  
173 tained for *PfZIP1* and *PfCDF* (Figure S3B, C). For *PfZIP1*-TGD, the correct integration of the  
174 plasmid into the genomic locus and absence of wildtype locus was verified by PCR and sub-  
175 sequent growth experiments revealed no growth defect compared to *P. falciparum* 3D7  
176 wildtype parasites (Figure S2B), suggesting its redundancy during asexual parasite prolifera-  
177 tion. For *PfCDF*-TGD the correct integration of the plasmid into the genomic locus was also  
178 verified, but wildtype DNA was still detectable and remained even upon prolonged culturing  
179 under G418/WR selection and limited dilution cloning (Figure S3C). In contrast, six  
180 (*PfPMRT1*, *PfDMT2*) or eight (*PfFVRT1*, *PfMFS6*) independent attempts to obtain TGD cell  
181 lines for the other four transporters with the respective plasmids failed, indicating that these  
182 genes have an indispensable role in blood stage parasite growth.

183 To probe into the function of the putative transporters where we were unable to generate  
184 gene-disruptions, we utilized the glmS ribozyme sequence. The corresponding sequence  
185 was integrated into the 3'UTR of the targeted genes. This enabled the induction of condition-  
186 al degradation of respective mRNAs upon addition of glucosamine (42) and the assessment  
187 of the phenotypic consequences. Upon addition of 2.5 mM glucosamine to young ring stage  
188 parasites we found a 76.8% (+/- SD 3.7) reduction in GFP fluorescence intensity in *PfDMT2*-  
189 GFP parasites, 72.7% (+/- SD 9.4) reduction in *PfMFS6*-GFP and a 77.7% (+/- SD 6.1) re-

190 duction in *PfPMRT1*-GFP in schizonts of the same cycle (Figure 2A–C, S4A–C). No measur-  
191 able reduction in fluorescence intensity could be detected for *PfFVRT1*-GFP or *PfCDF*-GFP  
192 expressing parasite lines (Figure S4D–F). Presence of the glmS cassette in both plasmids  
193 was confirmed by PCR (Figure S4H). For parasite cell lines with a significant reduction in the  
194 expression of the endogenously tagged protein, proliferation was analyzed in the absence  
195 and presence of 2.5 mM glucosamine (Figure 2D, S4G). While no significant effect on growth  
196 was observed for *PfMFS6*, a growth reduction of 68.5 % (+/- SD 2.1) over two cycles was  
197 observed upon knockdown of *PfDMT2*. For *PfPMRT1*, a minor growth delay was measur-  
198 able, which resulted in a significantly reduced parasitemia at day 3 upon knockdown using 2.5  
199 mM glucosamine (two tailed Wilcoxon rank sum test,  $W = 15$ ,  $n_1 = 5$ ,  $n_2 = 3$ ,  $P = 0.03$ ), but  
200 was not significant when using 5 mM glucosamine (two tailed Wilcoxon rank sum test,  $W =$   
201  $10$ ,  $n_1 = 4$ ,  $n_2 = 3$ ,  $P = 0.16$ ) (Figure 2E). Additionally, significantly fewer newly formed ring  
202 stage parasites were observed at 84 hours post invasion (hpi) (Figure 2F), and multiple pair-  
203 wise post-hoc comparisons using the Conover-Iman rank sum test and Benjamini-Hochberg  
204 method to control the false discovery rates showed significant step-wise reductions of ring  
205 stage parasites after induction of GlmS-based knockdown of *PfPMRT1* using both, 2.5 mM  
206 glucosamine (adjusted  $P = 0.0078$ ) and 5 mM glucosamine (adjusted  $P = 0.0005$ ) in compar-  
207 ison to untreated control cell cultures.

208 To better characterize the minor growth phenotype of *PfPMRT1*-GFP-glmS parasites that  
209 might be due to incomplete knockdown, we generated a conditional *PfPMRT1* knockout cell  
210 line (cond $\Delta$ PMRT1) using the Dimerizable Cre (DiCre) system (52, 53). Again using the SLI  
211 system (41), the endogenous *PfPMRT1* was disrupted upstream of the region encoding the  
212 N-terminal transmembrane domain, but, at the same time introducing a recodonized second  
213 functional copy of *PfPMRT1* flanked by loxP sites in the genomic locus. This loxP-flanked  
214 allelic copy of *PfPMRT1* encodes an additional 3x hemagglutinin (HA) tag, which can be  
215 conditionally excised upon addition of a rapamycin analog (rapalog) via the enzymatic activity  
216 of an episomally expressed DiCre (Figure 3A). First, correct integration of the plasmid into  
217 the genomic locus was verified by PCR (Figure 3B). Second, expression and localization of  
218 the recodonized HA-tagged protein at the PPM was verified by colocalization with the  
219 merozoite plasma membrane marker MSP1 (54) (Figure 3C). Third, excision of the  
220 recodonized gene upon rapalog addition was confirmed on genomic level by PCR (Figure  
221 3D) and on protein level by Western blot analysis at 24 hpi and 48 hpi (Figure 3E). To assess  
222 the effect of conditional *PfPMRT1* knockout on parasite proliferation, we determined growth  
223 of the transgenic parasite cell line with and without rapalog over five days (Figure 3F, S5A).  
224 In contrast to the glmS-based knockdown experiment, DiCre-based gene excision (induced  
225 by the addition of rapalog to young ring stages of cond $\Delta$ PMRT1 parasite cell cultures) abol-  
226 ished growth within the first replication cycle (Figure 3F, S5A). The specificity of the observed

227 growth phenotype was verified by gene complementation. To achieve this, we episomally  
228 expressed recodonized *PfPMRT1* with TY1-epitope tag either under the constitutive *nmd3* or  
229 the weaker *sf3a2* promoter (55) in the *condΔPMRT1* cell line (Figure 3D, F, S5B, C). Correct  
230 localization of the TY1-tagged *PfPMRT1* at the PPM was verified by immunofluorescence  
231 assays (IFA) (Figure 3G). Notably both, complementation of the *PfPMRT1* knockout cell line  
232 (*condΔPMRT1*) with recodonized *PfPMRT1* either under control of the constitutive *nmd3* or  
233 the weaker *sf3a2* promoter, restored parasite growth (Figure 3F, S5B, C). The level of growth  
234 restoration with low level expression of recodonized *PfPMRT1* is in line with the results from  
235 *glmS*-knockdown experiments, which showed that a reduction of about 75% in protein ex-  
236 pression resulted only in a minor growth perturbation (Figure 2C, D).

### 237 **Loss of the PPM-localized *PfPMRT1* leads to an arrest of parasite development at** 238 **trophozoite stage and the formation of PPM derived protrusions**

239 To determine, which particular parasite stages are affected by the knockout of *PfPMRT1*, we  
240 added rapalog to tightly synchronized parasites at different time points (4, 20 and 32 hpi)  
241 (Figure 4A) and monitored parasite growth by flow cytometry. Additionally, we quantified  
242 growth perturbation by microscopy of Giemsa smears at 4, 20, 24, 32, 40, 48, 72 and 96 hpi  
243 (Figure 4B, S6A, B). When adding rapalog at 4 hpi, parasite development progressed  
244 through ring and early trophozoite stages up to 24 hpi with no visible abnormality. After-  
245 wards, parasites with deformed and enlarged protrusions started to appear and further de-  
246 velopment occurred to be stalled. At 32 hpi, almost all parasites had developed to late  
247 trophozoites/early schizonts in the control, whereas these stages were completely absent in  
248 *PfPMRT1*-deficient parasites. Over 50% of the parasites were pycnotic or possessed large  
249 protrusions, the remaining parasites stayed arrested at the trophozoite stage. Quantification  
250 of the percentage of parasites with protrusions between 20 hpi and 32 hpi revealed 94.8%  
251 (+/- SD 4.0) protrusion-positive parasites (Figure 4C). The activation of gene excision at later  
252 time points by adding rapalog at 20 hpi or 32 hpi resulted in no or minor growth perturbation  
253 in the first cycle with successful re-invasion, but again led to parasites arresting at the  
254 trophozoite stage in the second cycle with an accumulation of protrusions (Figure 4A, S6A,  
255 B).

256 In order to get further insights into the morphological changes in *PfPMRT1*-deficient para-  
257 sites, we incubated these parasites with dihydroethidium (DHE) to visualize the parasite cy-  
258 tosol (44). We observed an absence of staining within the protrusions, suggesting they are  
259 not filled with parasite cytosol (Figure 4D). Next, we transfected the *condΔPMRT1* cell line  
260 with a plasmid encoding the PPM marker Lyn-mCherry (41) and observed Lyn-mCherry-  
261 positive protrusions upon knockout of *PfPMRT1* starting to become visible at 24 hpi, indicat-  
262 ing that the protrusions originate from the PPM (Figure 4E). In line with this, protrusion mem-

263 branes were also stainable with BODIPY TR C5 ceramide in cond $\Delta$ PMRT1 parasites at 32  
264 hpi (Figure 4F).

### 265 **Depletion of *Pf*PMRT1 results in an early arrest of gametocyte development**

266 RNA-seq data suggest *Pf*PMRT1 is also expressed during other developmental stages, such  
267 as gametocytes (56, 57). Therefore, we assessed expression of *Pf*PMRT1-GFP during  
268 gametocytogenesis by re-engineering *Pf*PMRT1-GFP-glmS in the inducible gametocyte pro-  
269 ducer (iGP) '3D7-iGP' (58) parasite line, which allows the robust induction of sexual commit-  
270 ment by conditional expression of gametocyte development 1 protein (GDV1) upon addition  
271 of shield-1 (58) (Figure S7A). We show that *Pf*PMRT1 is indeed expressed during all stages  
272 of gametocytogenesis and again localizes to the PPM, colocalizing with the PPM-marker  
273 Lyn-mCherry (41) (Figure 5A, B). Conditional knockdown of *Pf*PMRT1 via the glmS-ribozyme  
274 system (Figure S7B) resulted in a reduction in *Pf*PMRT1-GFP fluorescence intensity of  
275 79.4% (+/- SD 9.2%) at 7 days post induction (dpi) or 75.5% (+/- SD 23.2%) at 10 dpi, with-  
276 out an effect on gametocyte development (Figure S7C-F). In order to exclude that a role of  
277 *Pf*PMRT1 in gametocytogenesis is covered by only a partial knockdown resulting in low lev-  
278 els of expressed protein and to determine if *Pf*PMRT1 is essential for gametocytogenesis, we  
279 episomally expressed GDV1-GFP-DD in the cond $\Delta$ PMRT1 parasite line, enabling conditional  
280 induction of sexual commitment upon addition of shield 1 in these parasites (59). Conditional  
281 knockout of *Pf*PMRT1 in these transgenic parasites at day three post gametocyte induction  
282 resulted in pycnotic parasites from day 5 onwards, while excision of *Pf*PMRT1 at day 5 post  
283 induction had no effect on gametocyte development (Figure 5C, D). Excision of the  
284 recodonized gene upon rapalog addition was confirmed at a genomic level by PCR for both  
285 conditions (Figure 5E). Quantification of parasite stages at day 10 post induction of GDV1  
286 expression revealed 77.9% (+/- SD 7.7%) gametocytes and 22.1% (+/- SD 7.7%) pycnotic  
287 parasites in the control, while 100% of parasites were already pycnotic in the cultures, with  
288 induced knockout by addition of rapalog at day 3 post gametocyte induction by GDV1 ex-  
289 pression (Figure 5F). This data indicates that *Pf*PMRT1 is important for early gametocyte  
290 development.

### 291 **PMRT1 is unique to the genus *Plasmodium* and interspecies complementation assays** 292 **showed partial functional conservation**

293 *Pf*PMRT1 shows a lack of sequence similarities with known or putative transporters and/or  
294 conserved domains shared with known transporter families (2, 5). Our phylogenetic analysis  
295 revealed that homologs of *Pf*PMRT1 are present across *Plasmodium* species with amino  
296 acid sequence identities of about 90% in the subgenus *Laverania*, but about 50% outside  
297 *Laverania* (Figure 6A). However, prediction of the protein structure using AlphaFold (39) indi-  
298 cates two bundles of four transmembrane helices with reasonable similarity of the C-terminal



299 bundle with the photosynthetic reaction center Maquette-3 protein (60) (RMSD of 3.12) (Fig-  
300 ure 6B, Figure S1B). In order to test for functional conservation, we expressed the *PfPMRT1*  
301 homologs of *P. vivax* (PVP01\_0936100) and *P. knowlesi* (PKNH\_0933400) episomally as C-  
302 terminal Ty-1 fusion proteins under the *nmd3* promoter in the *condΔPMRT1* parasites. Both  
303 fusion proteins are expressed. They were again localized at the PPM as shown by IFA (Fig-  
304 ure 6C, Figure S8), and, importantly, were able to partially restore growth after two cycles to  
305 64.8% (+/- SD 9.8%) and 65.1% (+/- SD 7.4%) compared to *condΔPMRT1* parasites (Figure  
306 6D, S8). Excision of the recodonized endogenous *Pfpmrt1* gene upon rapalog addition was  
307 confirmed at a genomic level by PCR (Figure 6E). These data indicate that PMRT1 is func-  
308 tionally conserved within the genus *Plasmodium*.

## 309 Discussion

310 In this manuscript we functionally described four so called “orphan transporter” (31) in *P.*  
311 *falciparum*, which were partially characterized in *P. berghei*, and included two additional so  
312 far uncharacterized proteins with transporter sequence signature.

313 We localized *PfFVRT1*-GFP – annotated on PlasmoDB (38) as putative divalent metal trans-  
314 porter – at the food vacuole of the parasite, which is in line with a previously predicted food  
315 vacuole association (1) and its reported homology (1, 61) to the conserved eukaryotic  
316 endosomal/lysosomal natural resistance-associated macrophage protein (NRAMP) trans-  
317 porter (62) in our structure similarity search. Repeated attempts to generate a TGD cell line  
318 failed, indicating an important role of this transporter during asexual blood stage develop-  
319 ment which is in agreement with data from a *P. falciparum* genome wide essentiality screen  
320 (63).

321 In concordance with recently published data identifying *PbDMT2* and *PbMFS6* as leaderless  
322 apicoplast transporters (32), we localized GFP-fusion proteins of *PfDMT2* and *PfMFS6* at the  
323 apicoplast. Successful knockdown of *PfDMT2* resulted in a growth defect in the second cycle  
324 after induction, resembling the described delayed death phenotype of other apicoplast genes  
325 that were functionally inactivated (32, 64–66). It suggests an essential role of *PfDMT2* in  
326 apicoplast physiology, as observed by Sayers *et al.* (32) for the rodent malaria *P. berghei*.  
327 This is further supported by our failed attempts to disrupt this gene using the SLI system.

328 We also failed to disrupt the *PfMFS6* locus, which is in agreement with the gene knockout  
329 studies in *P. berghei* that led to a markedly decreased multiplication rate (31, 32, 67). Never-  
330 theless, glmS-based knock-down, although comparable to *PfDMT2*-GFP knockdown (72.7%  
331 versus 76.8% reduction in GFP fluorescence, respectively) had no effect on parasite prolifer-  
332 ation in our study. This might indicate that these reduced levels of *PfMFS6*, in contrast to  
333 reduced levels of *PfDMT2*, are sufficient for normal asexual replication *in vitro*.

334 Another candidate, *PfCDF*, annotated as putative cation diffusion facilitator family protein,  
335 showed multiple cytosolic foci within the parasite with no co-localization with apical organelle

336 markers. The homologue in *Toxoplasma gondii*, TgZnT (TgGT1\_251630) shows a similar  
337 cellular distribution (68). It has recently been shown to transport  $Zn^{2+}$ , to localize to vesicles  
338 at the plant-like vacuole in extracellular tachyzoites and to be present at dispersed vesicles  
339 throughout the cytoplasm of intracellular tachyzoites (68). The essentiality of PfCDF for *in*  
340 *vitro* blood stage growth is debatable. We were not able to generate a clonal wild-type free  
341 TGD cell line although correct integration of the plasmid into the genomic locus could be veri-  
342 fied (Figure S3C). This points towards its dispensability for *in vitro* blood stage growth, which  
343 is supported by i) its high (1.0) mutagenesis index score in a *P. falciparum* genome-wide mu-  
344 tagenesis screen (63) and ii) gene deletion experiments in rodent malaria species showing  
345 that CDF proteins are non-essential for *in vivo* blood stage development in *P. yoelii* (69) and  
346 *P. berghei* (31, 67).

347 Finally, two putative transporters, PfZIP1 and PfPMRT1, localized to the PPM. We show that  
348 PfZIP1 is non-essential for *P. falciparum in vitro* blood stage development, in line with a high  
349 (0.7) mutagenesis index score in a *P. falciparum* genome-wide mutagenesis screen (63).  
350 However, this is in contrast to the reported strong fitness loss in *P. berghei* (67) knockout  
351 mutants and failed knockout attempts in *P. yoelii* and *P. berghei in vivo* mouse models (32,  
352 69). These observations may reflect differences between *Plasmodium* species or differing  
353 requirements for *in vitro* and *in vivo* growth conditions.

354 PfPMRT1 is annotated as a conserved *Plasmodium* membrane protein with unknown func-  
355 tion. It has been described as a protein showing structural characteristics of a transporter,  
356 without sharing sequence similarities with known or putative transporters and/or conserved  
357 domains of known transporter families (2, 5). It encompasses 410 amino acids with eight  
358 predicted (70) transmembrane domains (TM) (Figure S1). The N- and C-terminal parts of  
359 PfPMRT1 are both predicted (71) to be facing the cytosolic side of the parasite. Surface elec-  
360 trostatics indicate a clear polarity of PfPMRT1 with negative charges facing the  
361 parasitophorous vacuole (PV) lumen and positive charges inside the parasite cytosol (Figure  
362 S8F). The loops protruding into the PV lumen of PfPMRT1 are generally larger than the cyto-  
363 solic loops and possess stretches of negatively charged amino acids likely relevant for its  
364 transport function. Further functional characterization of PfPMRT1 will deliver insight into its  
365 transporter capabilities and its physiological role.

366 Our phylogenetic analysis confirmed PMRT1 as unique for *Plasmodium* species with high  
367 sequence conservation only within the *Laverania* subgenus (72). In line with data from ge-  
368 nome-wide mutagenesis screens (63, 67) and reported failed knockout attempts in *P. yoelii*  
369 (69), we found that PfPMRT1 is essential for parasite growth, as its functional inactivation  
370 resulted in growth arrest at the trophozoite stage accompanied by the accumulation of PPM-  
371 derived protrusions within the parasite. In contrast, conditional knockdown resulted only in a  
372 growth delay, indicating that minor residual PfPMRT1 protein levels appear to be sufficient to

373 promote parasite growth. This finding was validated by episomal expression of an allelic copy  
374 under the control of the weak *sf3a2* promoter (55) in the *PfPMRT1* knockout parasites. Addi-  
375 tionally, we found that *PfPMRT1* is essential for early gametocytogenesis. Interestingly, the  
376 induction of the knockout at stage II–III had no effect on gametocytogenesis. This might be  
377 due to sufficient amounts of *PfPMRT1* already present at the PPM, but could also indicate  
378 that the function of the transporter is not required for later stage gametocyte maturation.

379 For future work, further functional and pharmacological characterization of this transporter  
380 will provide insights into its biological role in different stages of the parasites life cycle, as  
381 transcriptomic data indicates – along with expression in blood stages (34, 35) – *PfPMRT1* is  
382 expressed in oocysts of *P. falciparum* (73, 74) and *P. berghei* (75).

## 383 **Material and methods**

### 384 **Cloning of plasmid constructs for parasite transfection**

385 For endogenous tagging using the SLI system (41) a 889 bp (for *PfPMRT1*;  
386 PF3D7\_1135300), 905 bp (*PfFVRT1*; PF3D7\_0523800), 827bp (*PfZIP1*; PF3D7\_0609100),  
387 873 bp (*PfDMT2*; PF3D7\_0716900), 877 bp (*PfMFS6*; PF3D7\_1440800), 785 bp (*PfCDF*;  
388 PF3D7\_0715900) long homology region (HR) was amplified using 3D7 gDNA and cloned  
389 into pSLI-GFP-glmS (76) (derived from pSLI-GFP (41)) using the NotI/MluI restriction site. In  
390 order to generate *PfPMRT1*-2xFKBP-GFP a 1000 bp long HR was amplified using 3D7  
391 gDNA and cloned into pSLI-2xFKBP-GFP (41).

392 For SLI-based targeted gene disruption (SLI-TGD) (41) a 501 bp (*PfPMRT1*), 378 bp  
393 (*PfFVRT1*), 511 bp (*PfZIP1*), 399 bp (*PfDMT2*), 396 bp (*PfMFS6*), 741 bp (*PfCDF*) long ho-  
394 mology region was amplified using 3D7 gDNA and cloned into the pSLI-TGD plasmid (41)  
395 using NotI and MluI restriction sites.

396 For conditional deletion of *PfPMRT1*, the first 492 bp of the *PfPMRT1* gene were PCR ampli-  
397 fied to append a first loxP site and a recodonized T2A skip peptide. The recodonized full-  
398 length coding region of *PfPMRT1* was synthesized (GenScript, Piscataway, NJ, USA) and  
399 PCR amplified with primers to add a second loxP site after the gene to obtain a second  
400 fragment. Both fragments were cloned into pSLI-3xHA (55), using NotI/SpeI and AvrII/XmaI  
401 sites. This resulted in plasmid pSLI-*PfPMRT1*-loxP and the resulting transgenic cell line after  
402 successful genomic modification was transfected with pSkip-Flox (41) using 2 µg/ml  
403 Blasticidin S to obtain a line expressing the DiCre fragments (cond $\Delta$ PMRT1).

404 For complementation constructs, the recodonized *PfPMRT1* gene was PCR amplified using  
405 primers to append the TY1 sequence and cloned via XhoI and AvrII or KpnI into pEXP1comp  
406 (55) containing yDHODH as a resistance marker and different promoters (*nmd3*  
407 (PF3D7\_0729300), *sf3a2* (PF3D7\_0619900)) driving expression of the expression cassette.  
408 This resulted in plasmids c-<sup>nmdr</sup>*PfPMRT1*-ty1 and c-<sup>sf3a2</sup>*PfPMRT1*-ty1.

409 *PfPMRT1* homologues of *P. vivax* (PVP01\_0936100) (77) and *P. knowlesi* (PKNH\_0933400)  
410 (78) were amplified from parasite gDNA and cloned into p<sup>nmd3</sup>EXP1comp (55) via the  
411 XhoI/AvrII restriction site. For co-localization experiments the plasmids pLyn-FRB-mCherry  
412 (41), P40PX-mCherry (44), pARL-<sup>crt</sup>ACP-mCherry (46), pARL-<sup>ama1</sup>ARO-mCherry (49) and  
413 pARL-<sup>ama1</sup>AMA1-mCherry (51) were used. For conditional gametocyte induction yDHODH  
414 was amplified by PCR from pARL-<sup>ama1</sup>AMA1-mCherry-yDHODH (51) and cloned into GDV1-  
415 GFP-DD-hDHFR(59)(59) using the XhoI/XhoI restriction site.  
416 Oligonucleotides and plasmids used in this study are listed in **Table S1A** and **S1B**.

#### 417 ***P. falciparum* culture and transfection**

418 Blood stages of *P. falciparum* 3D7 were cultured in human erythrocytes (O+). Cultures were  
419 maintained at 37°C in an atmosphere of 1% O<sub>2</sub>, 5% CO<sub>2</sub> and 94% N<sub>2</sub> using RPMI complete  
420 medium containing 0.5% Albumax according to standard protocols (79). To maintain syn-  
421 chronized parasites, cultures were treated with 5% sorbitol (80).

422 Induction of gametocytogenesis was done as previously described (58, 59). Briefly, GDV1-  
423 GFP-DD expression was achieved by addition of 4 µM shield-1 to the culture medium and  
424 gametocyte cultures were treated with 50 mM N-acetyl-D-glucosamine (GlcNAc) for five days  
425 starting 72 hours post shield-1 addition to eliminate asexual parasites(81). Alternatively,  
426 asexual ring stage cultures with >10% parasitemia were synchronized with Sorbitol (80)  
427 cultured for 24 hours and treated with 50 mM N-acetyl-D-glucosamine (GlcNAc) (81) for five  
428 days.

429 For transfection, Percoll-purified (82) late-schizont-stage parasites were transfected with 50  
430 µg of plasmid DNA using Amaxa Nucleofector 2b (Lonza, Switzerland) as previously de-  
431 scribed(83). Transfectants were selected either using 4 nM WR99210 (Jacobus Pharmaceu-  
432 ticals), 2 µg/ml Blasticidin S (Life Technologies, USA), or 0.9 µM DSM1 (84) (BEI Resources;  
433 <https://www.beiresources.org>). In order to select for parasites carrying the genomic modifica-  
434 tion using the SLI system (41), G418 (Sigma-Aldrich, St. Louis, MO) at a final concentration  
435 of 400 µg/ml was added to 5% parasitemia culture. The selection process and testing for  
436 integration were performed as previously described (41).

437 For SLI-TGD, a total of six (*PfPMRT1*, *PfDMT2*, *PfZIP1*, *PfCDF*) or eight (*PfFVRT1*, *PfMFS6*)  
438 independent 5 ml cultures containing the episomal plasmid were selected under G418 for at  
439 least eight weeks.

#### 440 **Imaging and immunofluorescence analysis (IFA)**

441 Fluorescence images of infected erythrocytes were observed and captured using a Zeiss  
442 Axioskop 2plus microscope with a Hamamatsu Digital camera (Model C4742-95), a Leica  
443 D6B fluorescence microscope equipped with a Leica DFC9000 GT camera and a Leica Plan  
444 Apochromat 100x/1.4 oil objective or an Olympus FV3000 with a x100 MPLAPON oil objec-

445 tive (NA 1.4). Confocal microscopy was performed using a Leica SP8 microscope with laser  
446 excitation at 405 nm, 490 nm, and 550 nm for DAPI, GFP, and mCherry excitation, respec-  
447 tively. An HC PL APO 63x NA 1.4 oil immersion objective was used and images were ac-  
448 quired with the HyVolution mode of the LASX microscopy software. After recording, images  
449 were deconvolved using Huygens (express deconvolution, setting 'Standard').  
450 Microscopy of unfixed IEs was performed as previously described (85). Briefly, parasites  
451 were incubated in RPMI1640 culture medium with Hoechst-33342 (Invitrogen) for 15 minutes  
452 at 37°C prior to imaging. 7 µl of IEs were added on a glass slide and covered with a cover  
453 slip. Control images of 3D7 wild type parasites across the IDC are included in **Figure S8D, E**.  
454 BODIPY TR C5 ceramide (Invitrogen) staining was performed by adding the dye to 32 hours  
455 post invasion parasites in a final concentration of 2.5 µM in RPMI as previously described  
456 (85). For DHE staining of the parasite cytosol (44), 80 µl of resuspended parasite culture  
457 were incubated with DHE at a final concentration of 4.5 µg/ml in the dark for 15 minutes prior  
458 to imaging.

459 IFAs were performed as described previously (86). Briefly, IEs were smeared on slides and  
460 air-dried. Cells were fixed in 100% ice cold methanol for 3 minutes at -20°C. Afterwards, cells  
461 were blocked with 5% milk powder for 30 minutes. Next primary antibodies were diluted in  
462 PBS/3% milk powder and incubated for 2 hours, followed by three washing steps in PBS.  
463 Secondary antibodies were applied for 2 hours in PBS/3% milk powder containing 1 µg/ml  
464 Hoechst-33342 (Invitrogen) or DAPI (Roche) for nuclei staining, followed by 3 washes with  
465 PBS. One drop of mounting medium (Mowiol 4-88 (Calbiochem)) was added and the slide  
466 sealed with a coverslip for imaging.

467 To assess the localisation of the endogenously HA-tagged *PfPMRT1* IFAs were performed in  
468 suspension with Compound 2-stalled schizonts (87) to distinguish protein located at the PPM  
469 from that located at the PVM as previously done (55, 88). For this, trophozoite stages were  
470 treated with Compound 2 (1 µM) overnight, and arrested schizonts were harvested, washed  
471 in PBS, and fixed with 4% paraformaldehyde/0.0075% glutaraldehyde in PBS. Cells were  
472 permeabilized with 0.5% Triton X-100 in PBS, blocked with 3% BSA in PBS, and incubated  
473 overnight with primary antibodies diluted in 3% BSA in PBS. Cells were washed 3 times with  
474 PBS and incubated for 1 hour with Alexa 488 nm or Alexa 594 nm conjugated secondary  
475 antibodies specific for human and rat IgG (Invitrogen) diluted 1:2,000 in 3% BSA in PBS and  
476 containing 1 µg/ml DAPI. Cells were directly imaged after washing 5 times with PBS

477 Antisera used: 1:200 mouse anti-GFP clones 7.1 and 13.1 (Roche), 1:500 rat anti-HA clone  
478 3F10 (Roche), 1:1000 human anti-MSP1 (89), 1:10000 mouse anti-TY1 (ThermoFischer Sci-  
479 entific Cat.No: MA5-23513). Contrast and intensities were linear adjusted if necessary and  
480 cropped images were assembled as panels using Fiji (90), Corel Photo-Paint X6 and  
481 Adobe Photoshop CC 2021.

## 482 **Immunoblots**

483 For immunoblotting parasites were released from erythrocytes by incubation with 0.03%  
484 saponin in PBS for 10 minutes on ice followed by three wash steps with D-PBS. Proteins  
485 were then extracted with lysis buffer (4 % SDS, 0.5 % Triton X-100, 0.5x D-PBS in dH<sub>2</sub>O) in  
486 the presence of protease cocktail inhibitor (Roche) and 1 mM PMSF followed by addition of  
487 reducing SDS sample buffer and 5 minutes incubation at 55°C. Parasite proteins were sepa-  
488 rated on a 10% SDS-PAGE gel using standard procedures and transferred to a nitrocellulose  
489 membrane (Amersham™Protran™ 0.45 µm NC, GE Healthcare) using a transblot device  
490 (Bio-Rad) according to manufacturer's instructions or to a nitrocellulose membrane (Licor) in  
491 a tankblot device (Bio-Rad) using transfer buffer (0.192 M glycine, 0.1% SDS, 25 mM Tris-  
492 HCl pH = 8.0) with 20% methanol.

493 Rabbit anti-aldolase (91) and anti-SBP1 (91) antibodies were diluted 1:2,000, mouse anti-  
494 GFP clones 7.1 and 13.1 (Roche) antibody was diluted 1:500 or 1:1,000, mouse anti-Ty1  
495 (Sigma) was diluted 1:20000, rabbit anti-BIP (92) was diluted 1:2500 and rat anti-HA clone  
496 3F10 (Roche) antibody was diluted 1:1,000.

497 The chemiluminescent signal of the HRP-coupled secondary antibodies (Dianova) was visu-  
498 alized using a Chemi Doc XRS imaging system (Bio-Rad) and processed with Image Lab  
499 Software 5.2 (Bio-Rad). To perform loading controls and ensure equal loading of parasite  
500 material anti-aldolase antibodies were used. The corresponding immunoblots were incubated  
501 two times in stripping buffer (0.2 M glycine, 50 mM DTT, 0.05% Tween 20) at 55°C for 1 hour  
502 and washed 3 times with TBS for 10 minutes. For Western blots shown in Figure  
503 S8C fluorescent signals of secondary goat anti-rabbit IgG coupled to IRDye® 680CW and  
504 goat anti-mouse IgG coupled to IRDye® 800CW were visualized using Odyssey Fc Imager  
505 by LI-COR Biosciences.

## 506 **Growth Assay**

507 A flow cytometry-based assay adapted from previously published assays (44, 93) was per-  
508 formed. For this, parasite cultures were resuspended and 20 µl samples were transferred to  
509 an Eppendorf tube. 80 µl RPMI containing Hoechst-33342 and dihydroethidium (DHE) was  
510 added to obtain final concentrations of 5 µg/ml and 4.5 µg/ml, respectively. Samples were  
511 incubated for 20 minutes (protected from UV light) at room temperature, and parasitemia was  
512 determined using an LSRII flow cytometer by counting 100,000 events using the FACSDiva  
513 software (BD Biosciences) or using an ACEA NovoCyte flow cytometer.

## 514 **Stage distribution assay**

515 In order to obtain tightly synchronized parasite cultures, percoll purified schizonts (82) were  
516 cultured for four hours together with fresh erythrocytes, followed by sorbitol synchronization  
517 and resulting in a four-hour age window of parasites. Next, the culture was divided in four

518 dishes and rapalog was added at a final concentration of 250 nM immediately to one dish  
519 and at 20 hours post invasion (hpi) and 32 hpi to the respective dishes. Giemsa smears and  
520 samples for flow cytometry were collected at the indicated timepoints. The parasitemia was  
521 determined using a flow cytometry assay and the stages were determined microscopically  
522 counting at least 50 infected erythrocytes per sample and timepoint.

### 523 **Gametocyte stage distribution assay**

524 Giemsa-stained blood smears 10 days post induction of GDV1 expression were obtained  
525 and at least 10 fields of view were recorded using a 63x objective per treatment and time  
526 point. Erythrocyte numbers were then determined using the automated Parasitemia software  
527 (<http://www.gburri.org/parasitemia/>) while the number of gametocytes, pycnotic and asexual  
528 parasites was determined manually in >1800 erythrocytes per sample. This assay was done  
529 blinded.

### 530 **GlmS-based knockdown**

531 GlmS based knockdown assay was adapted from previously published assays (42, 76). To  
532 induce knockdown 2.5 or 5 mM glucosamine was added to highly synchronous early rings  
533 stage parasites. As a control, the same amount of glucosamine was also added to 3D7  
534 wildtype parasites. For all analyses, the growth medium was changed daily, and fresh glu-  
535 cosamine were added every day.

536 Knockdown was quantified by fluorescence live cell microscopy at day 1 and 3 of the growth  
537 assay. Parasites with similar size were imaged, and fluorescence was captured with the  
538 same acquisition settings to obtain comparable measurements of the fluorescence intensity.  
539 Fluorescence intensity (integrated density) was measured with Fiji(90), and background was  
540 subtracted in each image. The data were analyzed with Graph Pad Prism version 8.

541 GlmS based knockdown experiments in gametocytes were performed as described previ-  
542 ously (94). Briefly, synchronized ring stage cultures were induced by the addition of shield-1.  
543 At day 3 post induction the culture was split into two dishes and one dish was cultured in the  
544 presence of 2.5 mM glucosamine for the remaining ten days. Knockdown was quantified by  
545 fluorescence live cell microscopy at day 7 and 10 post induction, as described above and  
546 gametocyte parasitemia was determined at day 10 post induction using the automated  
547 Parasitemia software (<http://www.gburri.org/parasitemia/>).

### 548 **DiCre mediated conditional knockout**

549 The parasites containing the integrated pSLI-*PfPMRT1-loxP* construct were transfected with  
550 pSkip-Flox (41) using 2 µg/ml Blasticidin S to obtain a line expressing the DiCre fragments.  
551 To induce excision, the tightly synchronized parasites (detailed description see growth as-  
552 say) were split into 2 dishes and rapalog was added to one dish (Clontech, Mountain View,  
553 CA) to a final concentration of 250 nM. The untreated dish served as control culture. Excision

554 was verified at genomic level after 24 and 48 hours of cultivation by PCR and on protein level  
555 by Western blot using anti-HA antibodies.

### 556 **Phylogenetic analysis**

557 A blastp search of the PMRT1 sequence (PlasmoDB (38): PF3D7\_1135300; UniProt:  
558 Q8II12) was performed against the nr database (9 May 2021) using Geneious Prime  
559 2021.2.2 (<https://www.geneious.com>) and an E-value of 10e-0 (BLOSUM62 substitution ma-  
560 trix). Blast hits were filtered for sequences from taxa represented in the currently favored  
561 haemosporidian parasite phylogeny (95). The phylogeny derived from an amino acid align-  
562 ment using Bayesian framework with a partitioned supermatrix and a relaxed molecular clock  
563 (18\_amino\_acid\_partitioned\_BEAST\_relaxed\_clock\_no\_outgroup.tre; (95)) was visualized  
564 with associated data using the R package ggtree v3.3.0.900 (96, 97). A multiple protein se-  
565 quence alignment of PMRT1 and homologous sequences was performed using MAFFT  
566 v7.490 (98) using the G-INS-I algorithm to obtain a highly accurate alignment. Protein statis-  
567 tics were calculated using Geneious Prime 2021.2.2 (<https://www.geneious.com>) and EM-  
568 BOSS pepstats v6.6.0.0 (99).

### 569 **Prediction of protein structures**

570 AlphaFold structure predictions (39) were retrieved from <https://alphafold.ebi.ac.uk> and the  
571 PDB used for DALI protein structure homology search (40). PyMOL Molecular Graphics Sys-  
572 tem, Version 2.5.2 Schrödinger was used for visualization of all structures, generation of fig-  
573 ures and the calculation of the root mean square deviation (RMSD) between the predicted  
574 crystal structure of *Pf*PMRT1 and the Maquette-3 protein (PDB: 5vjt (60)) by cealign. The  
575 Adaptive Poisson-Boltzmann Solver (APBS) within PyMOL was used to predict the surface  
576 electrostatics of *Pf*PMRT1.

577 Parasite icons were generated using BioRender ([biorender.com](https://biorender.com)), plasmids and oligonucleo-  
578 tides were designed using ApE (100) and statistical analysis was performed using GraphPad  
579 Prism version 8 (GraphPad Software, USA).

580

### 581 **Acknowledgements**

582 We thank Michael Filarsky for providing the pHcamGDV1-GFP-DD\_hDHFR plasmid, Egbert  
583 Tannich for providing *P. vivax* and *P. knowlesi* gDNA, Mike Blackman for the anti-MSP1 anti-  
584 body, Jacobus Pharmaceuticals for WR99210, Greg Burri for the parasitemia software and  
585 the Advanced Light and Fluorescence Microscopy (ALFM) facility at the Centre for Structural  
586 Systems Biology (CSSB), in particular Roland Thuenauer, for support with light microscopy  
587 image recording and analysis. DSM1 (MRA-1161) was obtained from MR4/BEI Resources,  
588 NIAID, NIH. Furthermore, we thank Maria Rosenthal for her help with the visualization of the  
589 predicted protein structures.



## 590 **Funding**

591 AB and JSW were funded by the German Research Foundation (DFG) grant BA 5213/3-1.  
592 Partnership of Universität Hamburg and DESY (PIER) project ID PIF-2018-87 (JSTR, CL,  
593 TWG), CSSB Seed grant KIF 2019/002 (TWG), Hospital Research Foundation Fellowship  
594 (DW), DAAD/Universities Australia joint research co-operation scheme (TWG, DW, BL). IH  
595 and BL were supported by Australian Government Research Training Stipend. JY, SG and  
596 GN were funded by DFG Projektnummer 374031971 TRR 240 A04 and 417451587. JSTÄ  
597 thanks the Jürgen Manchot Stiftung for funding and PMR, TS acknowledge funding by the  
598 DFG (SP1209/4-1)

## 599 **Author contribution**

600 Conceptualization: JSW, TWG, AB, JSTR  
601 Methodology: GN, SG  
602 Investigation: JSW, PMR, JY, GF; JSTÄ, HVT, AA, IH, BL  
603 Formal Analysis: JSTR  
604 Writing original manuscript: JSW, AB, JSTR, DW  
605 Review & Editing: JSW, PMR, TWG, AB, JSTR, DW  
606 Funding Acquisition: DW, CL, TWG, AB, JSTR  
607 Resources: TWG  
608 Project Administration: TWG, AB, JSTR  
609 Supervision: DW, TS, SG, TWG, AB  
610 All authors read and approved the manuscript.  
611

## 612 **Figures**

613 **Figure 1: Subcellular localization of six putative *P. falciparum* transporters during**  
614 **asexual blood stage development.**

615 **(A)** Schematic representation of endogenous tagging strategy using the selection-linked in-  
616 tegration system (SLI). pink, human dihydrofolate dehydrogenase (hDHFR); grey, homology  
617 region (HR); green, green fluorescence protein (GFP) tag; dark grey, T2A skip peptide; blue,  
618 neomycin resistance cassette; orange, glmS cassette. Stars indicate stop codons, and ar-  
619 rows depict primers (P1 to P4) used for the integration check PCR. **(B–G)** Localization of (B)  
620 *PfVRT1*-GFP-glmS, (C) *PfZIP1*-GFP-glmS, (D) *PfCDF*-GFP-glmS, (E) *PfDMT2*-GFP-glmS,  
621 (F) *PfMFS6*-GFP-glmS and (G) *PfPMRT1*-GFP-glmS by live-cell microscopy in ring,  
622 trophozoite and schizont stage parasites. Nuclei were stained with Hoechst-33342. **(H)** Co-  
623 localization of the GFP-tagged putative transporters with marker proteins P40PX-mCherry  
624 (food vacuole), ACP-mCherry (apicoplast), Lyn-mCherry (parasite plasma membrane), ARO-

625 mCherry (rhoptry) and AMA1-mCherry (microneme) as indicated. Nuclei were stained with  
626 Hoechst- 33342. Scale bar, 2  $\mu$ m.

627

628 **Figure 2: Conditional knockdown of putative transporter indicate importance of**  
629 ***PfDMT2* and *PfPMRT1* for parasites fitness.**

630 **(A–C)** Live cell microscopy and quantification of knockdown by measuring mean fluores-  
631 cence intensity (MFI) density and size (area) of (A) *PfDMT2*-GFP-glmS (B) *PfMFS6*-GFP-  
632 glmS and (C) *PfPMRT1*-GFP-glmS parasites 40 hours after treatment without (control) or  
633 with 2.5 mM glucosamine. Scale bar, 2  $\mu$ m. Statistics are displayed as mean +/- SD of three  
634 (A–B) or four (C) independent experiments and individual data points are color-coded by ex-  
635 periments according to Superplots guidelines (101). P-values displayed were determined  
636 with two-tailed unpaired t-test. **(D)** Growth of parasites treated without (control) or with 2.5  
637 mM glucosamine determined by flow cytometry is shown as relative parasitemia values after  
638 two cycles. Shown are means +/- SD of three (*PfPMRT1*-GFP-glmS, *PfDMT2*-GFP-glmS,  
639 *PfMFS6*-GFP-glmS) and five (3D7 wild type parasites) independent growth experiments. P-  
640 values displayed were determined with unpaired t test with Welch correction and Benjamin-  
641 Hochberg for multiple testing correction. Individual growth curves are shown in **Figure S4G**.  
642 **(E)** Growth of *PfPMRT1*-glmS and 3D7 parasites after treatment with 2.5 mM (left panel) and  
643 5 mM glucosamine (right panel) compared to untreated control parasites over five consecu-  
644 tive days. P-values displayed were determined for comparison between *PfPMRT1*-glmS and  
645 3D7 parasites at day 3 using two-tailed Wilcoxon rank sum test. **(F)** Mean +/- SD distribution  
646 of ring and schizont stage parasites in *PfPMRT1*-glmS and 3D7 cell lines treated without  
647 (control), with 2.5 mM or 5 mM glucosamine at 84 hpi (80 hours post addition of glucosa-  
648 mine) of three independent experiments. P-values displayed were determined using the  
649 Conover-Iman rank sum test and Benjamini-Hochberg method for multiple testing correction  
650 after Kruskal-Wallis testing.

651 **Figure 3: *PfPMRT1* is essential for asexual blood stage development.**

652 **(A)** Simplified schematic of DiCre-based conditional *PfPMRT1* knockout using selection-  
653 linked integration (SLI). Pink, human dihydrofolate dehydrogenase (hDHFR); grey, homology  
654 region (HR); green, T2A skip peptide; light blue, recodonomized *PfPMRT1*; dark blue, 3xHA tag,  
655 yellow, neomycin phosphotransferase resistance cassette; orange, loxp sequence. Scissors  
656 indicate DiCre mediated excision sites upon addition of rapalog. Stars indicate stop codons,  
657 and arrows depict primers (P1 to P5) used for the integration check PCR and excision PCR.  
658 **(B)** Diagnostic PCR of unmodified wildtype and transgenic cond $\Delta$ PMRT1 knock-in (KI) cell  
659 line to check for genomic integration using Primer P1-P4 as indicated in (A). **(C)** Immunofluo-  
660 rescence assay (IFA) of cond $\Delta$ PMRT1 late stage schizont parasites showing localization of

661 *PfPMRT1*-3xHA at the parasite plasma membrane (PPM) co-localizing with the merozoite  
662 surface protein 1 (MSP1). **(D)** Diagnostic PCR to verify the excision at genomic level at 24  
663 hpi / 20 hours post rapalog addition for *condΔPMRT1* and at 48 hpi for *condΔPMRT1*, *c-*  
664 *nmd3**PfPMRT1*-ty1 and *c-sf3a2**PfPMRT1*-ty1 parasites using Primer P1-P5 as indicated in (A).  
665 Black arrow head, original locus; red arrow head, excised locus. **(E)** Western blot using  $\alpha$ -HA  
666 to verify knockout of *PfPMRT1* on protein level 4, 24 and 48 hours post invasion. Expected  
667 molecular weight of *PfPMRT1*-3xHA: 53.3 kDa. Antibodies detecting Aldolase and SBP1  
668 were used as loading controls. **(F)** Growth curves of *condΔPMRT1*, *c-nmd3**PfPMRT1*-ty1 and  
669 *c-sf3a2**PfPMRT1*-ty1 parasites +/- rapalog monitored over five days by flow cytometry. One  
670 representative growth curve is depicted (replicates in **Figure S5**). Summary is shown as rela-  
671 tive parasitemia values, which were obtained by dividing the parasitemia of rapalog treated  
672 cultures by the parasitemia of the corresponding untreated ones. Shown are means +/- SD of  
673 three (*condΔPMRT1*, *c-nmd3**PfPMRT1*-ty1) or four (*c-sf3a2**PfPMRT1*-ty1) independent growth  
674 experiments. **(G)** IFA of *condΔPMRT1* complemented with C-terminal TY1-tagged *PfPMRT1*  
675 constructs expressed either under the constitutive *nmd3* or the weak *sf3a2* promoter to verify  
676 PPM localization. Scale bar, 2  $\mu$ m.  
677

678 **Figure 4: Knockout of *PfPMRT1* results in accumulation of PPM-derived protrusions**  
679 **and growth arrest at the trophozoite stage.**

680 **(A)** Parasite stage distribution in Giemsa smears displayed as heatmap showing percentage  
681 of parasite stages for tightly synchronized (+/- 2 h) 3D7 control and *condΔPMRT1* (rapalog  
682 treated at 4 hpi, 20 hpi or 32 hpi) parasite cultures over two consecutive cycles. A second  
683 replicate is shown in **Figure S6A** **(B)** Giemsa smears of control and at 4 hpi rapalog treated  
684 *condΔPMRT1* parasites over two cycles. Scale bar, 5  $\mu$ m. **(C)** Live cell microscopy of 4 hour  
685 window synchronized 3D7 control and *condΔPMRT1* parasites +/- rapalog stained with  
686 dihydroethidium (DHE) at 20–32 hpi. **(D)** Quantification of parasites displaying protrusions  
687 (green) for 4 hour window synchronized 3D7 control and rapalog treated *condΔPMRT1* para-  
688 sites. Shown are percentages of normal parasites versus parasites displaying protrusions as  
689 means +/- SD of three independent experiments. **(E)** Live cell microscopy of 8 hour window  
690 synchronized 3D7 control and rapalog treated *condΔPMRT1* parasites, episomally express-  
691 ing the PPM marker Lyn-mCherry at 24–40 hpi. **(F)** Live cell microscopy of 3D7 control and  
692 *condΔPMRT1* parasites +/- rapalog stained with BODIPY TR C5 ceramide at 32 hpi. Scale  
693 bar, 2  $\mu$ m.  
694

695 **Figure 5: *PfPMRT1* is essential for early gametocyte development.**

696 **(A)** Live cell microscopy of 3D7-iGP-*Pf*PMRT1-GFP parasites across the complete gameto-  
697 cyte development. White arrow heads indicate remaining GDV1-GFP signal observed in  
698 close proximity to the Hoechst signal, as previously reported (59, 94, 102, 103). **(B)** Live cell  
699 microscopy of *Pf*PMRT1-GFP parasites expressing the PPM marker Lyn-mCherry. Nuclei  
700 were stained with Hoechst-33342. Scale bar, 2  $\mu$ m. **(C)** Experimental setup of gametocyte  
701 induction upon GDV1-GFP-DD expression (+shield-1) and conditional *Pf*PMRT1 knockout  
702 (+rapalog) and elimination of asexual blood stage parasites (+GlcNac). **(D)** Gametocyte de-  
703 velopment over 12 days of cond $\Delta$ PMRT1/GDV1-GFP-DD or 3D7-iGP parasites without (con-  
704 trol) or with rapalog addition at day 3 (3 dpi) or day 5 (5 dpi) after induction of sexual com-  
705 mitment by conditional expression of GDV1-GFP upon addition of shield-1. Scale bar, 5  $\mu$ m.  
706 **(E)** Diagnostic PCR to verify the excision on genomic level at 5 dpi and 12 dpi. Black arrow  
707 head, original locus; red arrow head, excised locus. **(F)** Representative Giemsa smears and  
708 quantification of parasite stage distribution at day 10 post induction for parasites treated  
709 without (control) or with rapalog at day 3 post induction. For each condition parasitemia and  
710 parasite stages distribution in ( $\Delta$ PMRT1:  $n_{\text{control}} = 3370, 2304, 2759$  and  $n_{\text{rapalog}} = 3010, 1830,$   
711  $2387$ ; 3D7-iGP:  $n_{\text{control}} = 4985, 4685, 5206$  and  $n_{\text{rapalog}} = 4930, 4332, 5384$ ) erythrocytes of  
712 three independent experiments were determined and are displayed as percentage. Nuclei  
713 were stained with Hoechst-33342. Scale bar, 10  $\mu$ m.  
714

715 **Figure 6: PMRT1 is a genus-specific transporter with conserved function.**

716 **(A)** Phylogenetic tree of haemosporidian parasites (modified from (95)) containing PMRT1  
717 homologous sequences associated with data on pairwise amino acid sequence identity to  
718 *Pf*PMRT1. The phylogeny is derived from Bayesian Inference using BEAST using a fully par-  
719 titioned amino acid dataset and lognormal relaxed molecular clock (95). Silhouettes depict  
720 representatives of the vertebrate hosts for each lineage and white filled bars indicate pair-  
721 wise identities of PMRT1 homologs used for subsequent complementation assays. **(B)** Struc-  
722 tural alignment of predicted *Pf*PMRT1 structure with Maquette-3 protein (PDB: 5vjt) (60).  
723 Both structures have a root mean square deviation (RMSD) over the aligned  $\alpha$ -carbon posi-  
724 tion of 3.12 over 184 residues calculated in PyMol. **(C)** IFA of *c.*-*nmd3**Pk*-ty1 and *c.*-*nmd3**Pv*-ty1  
725 parasites to verify correct localization of the expressed complementation fusion proteins at  
726 the parasite plasma membrane. Nuclei were stained with Hoechst-33342. Scale bar, 2  $\mu$ m.  
727 **(D)** Growth of cond $\Delta$ PMRT1 parasites complemented with *Pf*PMRT1 homologs from *P. vivax*  
728 (PVP01\_0936100) and *P. knowlesi* (PKNH\_0933400). Shown are relative parasitemia val-  
729 ues, which were obtained by dividing the parasitemia of rapalog treated +/- cultures by the  
730 parasitemia of the corresponding untreated controls together with means +/- SD from three *c.*-  
731 *nmd3**Pf*-ty1 ( $\triangleq$  *c.*-*nmd3**Pf*PMRT1-ty1 Figure 3D, S5B) and six (*c.*-*nmd3**Pk*-ty1, *c.*-*nmd3**Pv*-ty1) inde-  
732 pendent growth experiments. One sample t-test **(E)** Diagnostic PCR to verify the excision of

733 *PfPMRT1* on genomic level at 48 hpi for *c-nmd3Pf-ty1*, *c-nmd3Pk-ty1* and *c-nmd3Pv-ty1* para-  
734 sites. Black arrow head, original locus; red arrow head, excised locus.  
735

736 **Figure S1: Structure predictions and structure homology search of candidate proteins**  
737 **(A)** AlphaFold structure predictions of the six selected orphan transporters visualized in  
738 PyMol. **(B)** Results from protein structure comparison server Dali using the AlphaFold-  
739 generated PDB files of the selected transporters as input structure. Shown are the top five  
740 non-redundant hits with Z score (significance estimate), msd (difference between the root-  
741 mean-square-deviation (rmsd) value associated with a protein structure pair and the rmsd  
742 value that would have been observed in the case that the two structures had the same crys-  
743 tallographic resolution), lali (number of aligned positions), nres (number of residues in the  
744 matched structure) and %id (the percentage sequence identity in the match).  
745

746 **Figure S2: Validation of generated transgenic cell lines by PCR and Western blot.**  
747 **(A)** Confirmatory PCR of unmodified wildtype (WT) and transgenic knock-in (KI) cell lines  
748 (PF3D7\_0523800-GFP-glmS (*PfFVRT1*), PF3D7\_0609100-GFP-glmS (*PfZIP1*),  
749 PF3D7\_0715900-GFP-glmS (*PfCDF*), PF3D7\_0716900-GFP-glmS (*PfDMT2*),  
750 PF3D7\_1440800-GFP-glmS (*PfMFS6*) and PF3D7\_1135300-GFP-glmS (*PfPMRT1*)) to  
751 check for genomic integration at the 3'- and 5'-end of the locus. Position of the primer used  
752 are indicated with numbered arrows in **Figure 1A**. **(B)** Western Blot analysis of wildtype (3D7)  
753 and knock-in (KI) cell lines using mouse anti-GFP to detect the tagged full-length protein  
754 (upper panel) and rabbit anti-aldolase to control for equal loading (lower panel). Protein size  
755 is indicated in kDa. Expected molecular weight for GFP fusion proteins: *PfFVRT1* (107.5  
756 kDa), *PfZIP1* (69.0 kDa), *PfDMT2* (66.4 kDa), *PfMFS6* (98.8 kDa), *PfPMRT1* (77.5 kDa),  
757 *PfCDF* (91.6 kDa) **(C)** Localization of *PfCDF*-3xHA by IFA in ring, trophozoite and schizont  
758 parasites. Nuclei were stained with Hoechst. Diagnostic PCR of unmodified wildtype (WT)  
759 and transgenic knock-in (KI) cell line. **(D)** Localization of *PfPMRT1*\_2xFKBP-GFP across the  
760 IDC. Nuclei were stained with DAPI. Scale bar, 2  $\mu$ m. Diagnostic PCR of unmodified wildtype  
761 (WT) and transgenic knock-in (KI) cell line. **(E)** Localization of *PfZIP1*-GFP in merozoites.  
762 Nuclei were stained with DAPI. Scale bar, 2  $\mu$ m. **(F)** Confocal microscopy of *PfPMRT1*-GFP  
763 co-expressing the PPM marker Lyn-mCherry. Scale bar, 1 $\mu$ m. Nuclei were stained with  
764 Hoechst.  
765

766 **Figure S3: Targeted gene disruption (TGD) of *PfZIP1* and *PfCDF*.**  
767 **A)** Schematic representation of TGD strategy using the selection-linked integration system  
768 (SLI). pink, human dihydrofolate dehydrogenase (hDHFR); grey, homology region (HR);

769 green, green fluorescence protein (GFP) tag; dark grey, T2A skip peptide; blue, neomycin  
770 resistance cassette. Stars indicate stop codons, and arrows depict primers (P1 to P4) used  
771 for the integration check PCR. **(B)** Localization of *PfZIP1*-TGD-GFP in ring, trophozoite and  
772 schizont parasites. Nuclei were stained with Hoechst-33342. Scale bar, 2  $\mu$ m. Confirmatory  
773 PCR of unmodified wildtype (WT) and transgenic targeted gene disruption (TGD) cell line.  
774 Growth curves of *PfZIP1*-TGD vs. 3D7 parasites monitored over five days by FACS. Three  
775 independent growth experiments were performed and a summary is shown as percentage of  
776 growth compared to 3D7 parasites. **(C)** Localization of *PfCDF*-TGD in ring, trophozoite and  
777 schizont parasites. Nuclei were stained with DAPI. Confirmatory PCR of unmodified wildtype  
778 (WT) and transgenic targeted gene disruption (TGD) cell line. Scale bar, 1  $\mu$ m.  
779

#### 780 **Figure S4: Conditional knockdown via *glmS* system.**

781 Live cell microscopy of **(A)** *PfFVRT1*-GFP-*glmS*, **(B)** *PfCDF*-GFP-*glmS*, **(C)** *PfZIP1*-GFP-  
782 *glmS* **(D)** *PfDMT2*-GFP-*glmS*, **(E)** *PfMFS6*-GFP-*glmS* and **(F)** *PfPMRT1*-GFP-*glmS* parasites  
783 40 hours after treatment without (control) or with 2.5 mM Glucosamine. Nuclei were stained  
784 with Hoechst-33342. Scale bar, 2  $\mu$ m. **(G)** Individual growth curves of the growth assays  
785 shown in [Figure 2D](#). **(H)** PCR using a GFP forward and *glmS* reverse primer confirming the  
786 presence of the GFP and *glmS* sequence in the pSLI-*PfFVRT1*-GFP-*glmS* and *PfCDF*-GFP-  
787 *glmS* plasmids. pSLI-PF3D7\_0631900-GFP (35) was used as negative control.  
788

#### 789 **Figure S5: Conditional knockout of *PfPMRT1* via DiCre-based system**

790 Replicates of growth curves of *cond* $\Delta$ *PMRT1*, *c*<sup>-*nmd3*</sup>*PfPMRT1*-ty1 and *c*<sup>-*sf3a2*</sup>*PfPMRT1*-ty1  
791 parasites +/- rapalog monitored over five days by FACS shown in [Figure 3](#).  
792

#### 793 **Figure S6: Conditional knockout of *PfPMRT1***

794 **(A)** Parasite stage distribution in Giemsa smears displayed as heatmap showing percentage  
795 of stages for control, 4 hpi, 20 hpi or 32 hpi rapalog treated 4 hour window synchronized  
796 *cond* $\Delta$ *PMRT1* parasite cultures over one cycle. **(B)** Giemsa smears of control and 4 hpi, 20  
797 hpi or 32 hpi rapalog treated parasites at 4, 16, 20, 24, 32, 40 and 48 hpi. Scale bar, 5  $\mu$ m.  
798

#### 799 **Figure S7: Conditional knockdown of *PfPMRT1* has no effect during gametocyte de-** 800 **velopment.**

801 **(A)** Confirmatory PCR of unmodified wildtype (WT) and transgenic 3D7-iGP-*PfPMRT1*-GFP-  
802 *glmS* to check for genomic integration at the 3'- and 5'-end of the locus. Position of the pri-  
803 mer used are indicated with numbered arrows in [Figure 1A](#). **(B)** Schematic representation of

804 the experimental setup. **(C)** Live cell microscopy of 3D7-iGP-*PfPMRT1*-GFP stage I – V ga-  
805 metocytes. Scale bar, 2  $\mu$ m. **(D)** Giemsa smears of stage I – V gametocytes cultured either  
806 without (control) or with 2.5 mM glucosamine. Scale bar, 5  $\mu$ m. **(E)** Quantification of knock-  
807 down by measuring mean fluorescence intensity (MFI) density and size (area) of parasites at  
808 day 7 and day 12 post induction of gametocytogenesis cultured either without (control) or  
809 with 2.5 mM glucosamine. Scale bar, 2  $\mu$ m. Statistics are displayed as mean +/- SD of four  
810 independent experiments and individual data points are displayed as scatterplot color-coded  
811 by experiments according to Superplots guidelines(101)(101). P-values displayed were de-  
812 termined with two-tailed unpaired t-test. **(F)** For each condition gametocytemia at day 10 post  
813 gametocyte induction was determined by counting between 1256-2653 (mean 2147) cells  
814 per condition in Giemsa-stained thin blood smears. Displayed are means +/- SD of inde-  
815 pendent growth experiments with the number of experiments (n) indicated. P-values dis-  
816 played were determined with two-tailed unpaired t-test.

817

818 **Figure S8:** Individual growth curves of *c- nmd3Pk-ty1* **(A)** and *c- nmd3Pv-ty1* **(B)** parasites +/-  
819 rapalog monitored over two IDCs by FACS shown in **Figure 6**. **(C)** Western Blot analysis of *c-*  
820 *nmd3Pf-ty1*, *c- nmd3Pk-ty1* and *c- nmd3Pv-ty1* cell lines using mouse anti-ty1 to detect the tagged  
821 full-length protein (upper panel) and rabbit anti-BIP to control for loading (lower panel). Pro-  
822 tein size is indicated in kDa. **(D)** and **(E)** 3D7 wild type parasites imaged across the IDC to  
823 establish autofluorescence levels with Zeiss Axioskop 2plus microscope (D) or Leica D6B  
824 fluorescence microscope (E). **(F)** Surface electrostatics of the predicted *PfPMRT1* structure  
825 generated by APBS within PyMol.

826

827 **Table S1: Oligonucleotides and plasmids used in this study**

828

## 829 **References**

- 830 1. Martin RE, Henry RI, Abbey JL, Clements JD, Kirk K. 2005. The “permeome” of the  
831 malaria parasite: an overview of the membrane transport proteins of *Plasmodium*  
832 *falciparum*. *Genome Biol* 6:R26.
- 833 2. Martin RE. 2020. The transportome of the malaria parasite. *Biol Rev Camb Philos Soc*  
834 95:305–332.
- 835 3. Gardner MJ, Hall N, Fung E, White O, Berriman M, Hyman RW, Carlton JM, Pain A,  
836 Nelson KE, Bowman S, Paulsen IT, James K, Eisen JA, Rutherford K, Salzberg SL,  
837 Craig A, Kyes S, Chan M-S, Nene V, Shallom SJ, Suh B, Peterson J, Angiuoli S,

- 838 Perteua M, Allen J, Selengut J, Haft D, Mather MW, Vaidya AB, Martin DMA, Fairlamb  
839 AH, Fraunholz MJ, Roos DS, Ralph SA, McFadden GI, Cummings LM, Subramanian  
840 GM, Mungall C, Venter JC, Carucci DJ, Hoffman SL, Newbold C, Davis RW, Fraser  
841 CM, Barrell B. 2002. Genome sequence of the human malaria parasite *Plasmodium*  
842 *falciparum*. *Nature* 419:498–511.
- 843 4. Martin RE, Ginsburg H, Kirk K. 2009. Membrane transport proteins of the malaria  
844 parasite. *Mol Microbiol*. John Wiley & Sons, Ltd (10.1111).
- 845 5. Weiner J, Kooij TWA. 2016. Phylogenetic profiles of all membrane transport proteins  
846 of the malaria parasite highlight new drug targets. *Microb Cell* 3:511–521.
- 847 6. Garten M, Nasamu AS, Niles JC, Zimmerberg J, Goldberg DE, Beck JR. 2018. EXP2  
848 is a nutrient-permeable channel in the vacuolar membrane of *Plasmodium* and is  
849 essential for protein export via PTEX. *Nat Microbiol* 1.
- 850 7. Desai SA, Krogstad DJ, McCleskey EW. 1993. A nutrient-permeable channel on the  
851 intraerythrocytic malaria parasite. *Nature* 362:643–646.
- 852 8. Nguitragool W, Bokhari AAB, Pillai AD, Rayavara K, Sharma P, Turpin B, Aravind L,  
853 Desai SA. 2011. Malaria parasite *clag3* genes determine channel-mediated nutrient  
854 uptake by infected red blood cells. *Cell* 145:665–677.
- 855 9. Dean P, Major P, Nakjang S, Hirt RP, Martin Embley T. 2014. Transport proteins of  
856 parasitic protists and their role in nutrient salvage. *Front Plant Sci*. Frontiers Research  
857 Foundation.
- 858 10. Foote SJ, Thompson JK, Cowman AF, Kemp DJ. 1989. Amplification of the multidrug  
859 resistance gene in some chloroquine-resistant isolates of *P. falciparum*. *Cell* 57:921–  
860 930.
- 861 11. Fidock DA, Nomura T, Talley AK, Cooper RA, Dzekunov SM, Ferdig MT, Ursos LMB,  
862 Bir Singh Sidhu A, Naudé B, Deitsch KW, Su XZ, Wootton JC, Roepe PD, Wellems  
863 TE. 2000. Mutations in the *P. falciparum* digestive vacuole transmembrane protein  
864 PfCRT and evidence for their role in chloroquine resistance. *Mol Cell* 6:861–871.
- 865 12. Veiga MI, Dhingra SK, Henrich PP, Straimer J, Gnädig N, Uhlemann AC, Martin RE,  
866 Lehane AM, Fidock DA. 2016. Globally prevalent PfMDR1 mutations modulate  
867 *Plasmodium falciparum* susceptibility to artemisinin-based combination therapies. *Nat*  
868 *Commun* 7.
- 869 13. Rijpma SR, Van Der Velden M, Bilos A, Jansen RS, Mahakena S, Russel FGM,



- 870 Sauerwein RW, Van De Wetering K, Koenderink JB. 2016. MRP1 mediates folate  
871 transport and antifolate sensitivity in *Plasmodium falciparum*. *FEBS Lett* 590:482–492.
- 872 14. Mesén-Ramírez P, Bergmann B, Elhabiri M, Zhu L, Thien H von, Castro-Peña C,  
873 Gilberger T-W, Davioud-Charvet E, Bozdech Z, Bachmann A, Spielmann T. 2021. The  
874 parasitophorous vacuole nutrient pore is critical for drug access in malaria parasites  
875 and modulates the fitness cost of artemisinin resistance. *Cell Host Microbe* 0:283.
- 876 15. Cowman AF, Galatis D, Thompson JK. 1994. Selection for mefloquine resistance in  
877 *Plasmodium falciparum* is linked to amplification of the *pfmdr1* gene and cross-  
878 resistance to halofantrine and quinine. *Proc Natl Acad Sci U S A* 91:1143–1147.
- 879 16. Mok S, Liong KY, Lim EH, Huang X, Zhu L, Preiser PR, Bozdech Z. 2014. Structural  
880 polymorphism in the promoter of *pfmrp2* confers *Plasmodium falciparum* tolerance to  
881 quinoline drugs. *Mol Microbiol* 91:918–934.
- 882 17. Lim MYX, LaMonte G, Lee MCS, Reimer C, Tan BH, Corey V, Tjahjadi BF, Chua A,  
883 Nachon M, Wintjens R, Gedeck P, Malleret B, Renia L, Bonamy GMC, Ho PCL, Yeung  
884 BKS, Chow ED, Lim L, Fidock DA, Diagana TT, Winzeler EA, Bifani P. 2016. UDP-  
885 galactose and acetyl-CoA transporters as *Plasmodium* multidrug resistance genes.  
886 *Nat Microbiol* 1.
- 887 18. Richards SN, Nash MN, Baker ES, Webster MW, Lehane AM, Shafik SH, Martin RE.  
888 2016. Molecular Mechanisms for Drug Hypersensitivity Induced by the Malaria  
889 Parasite’s Chloroquine Resistance Transporter. *PLoS Pathog* 12.
- 890 19. Cowell AN, Istvan ES, Lukens AK, Gomez-Lorenzo MG, Vanaerschot M, Sakata-Kato  
891 T, Flannery EL, Magistrado P, Owen E, Abraham M, La Monte G, Painter HJ, Williams  
892 RM, Franco V, Linares M, Arriaga I, Bopp S, Corey VC, Gnädig NF, Coburn-Flynn O,  
893 Reimer C, Gupta P, Murithi JM, Moura PA, Fuchs O, Sasaki E, Kim SW, Teng CH,  
894 Wang LT, Akidil A, Adjalley S, Willis PA, Siegel D, Tanaseichuk O, Zhong Y, Zhou Y,  
895 Llinás M, Otilie S, Gamo FJ, Lee MCS, Goldberg DE, Fidock DA, Wirth DF, Winzeler  
896 EA. 2018. Mapping the malaria parasite druggable genome by using in vitro evolution  
897 and chemogenomics. *Science* (80- ) 359:191–199.
- 898 20. Rocamora F, Gupta P, Istvan ES, Luth MR, Carpenter EF, Kümpornsinn K, Sasaki E,  
899 Calla J, Mittal N, Carolino K, Owen E, Llinás M, Otilie S, Goldberg DE, Lee MCS,  
900 Winzeler EA. 2021. *PfMFR3*: A Multidrug-Resistant Modulator in *Plasmodium*  
901 *falciparum*. *ACS Infect Dis* 7:811–825.
- 902 21. Kirk K. 2004. Channels and transporters as drug targets in the *Plasmodium*-infected

- 903 erythrocyte. *Acta Trop* 89:285–298.
- 904 22. Koenderink JB, Kavishe RA, Rijpma SR, Russel FGM. 2010. The ABCs of multidrug  
905 resistance in malaria. *Trends Parasitol.* *Trends Parasitol.*
- 906 23. Muriithi JM, Deni I, Pasaje CFA, Okombo J, Bridgford JL, Gnädig NF, Edwards RL,  
907 Yeo T, Mok S, Burkhard AY, Coburn-Flynn O, Istvan ES, Sakata-Kato T, Gomez-  
908 Lorenzo MG, Cowell AN, Wicht KJ, Le Manach C, Kalantarov GF, Dey S, Duffey M,  
909 Laleu B, Lukens AK, Otilie S, Vanaerschot M, Trakht IN, Gamo F-J, Wirth DF,  
910 Goldberg DE, Odom John AR, Chibale K, Winzeler EA, Niles JC, Fidock DA. 2021.  
911 The Plasmodium falciparum ABC transporter ABCI3 confers parasite strain-dependent  
912 pleiotropic antimalarial drug resistance. *Cell Chem Biol* 0.
- 913 24. Counihan NA, Modak JK, de Koning-Ward TF. 2021. How Malaria Parasites Acquire  
914 Nutrients From Their Host. *Front Cell Dev Biol* 9:582.
- 915 25. Saliba KJ, Horner HA, Kirk K. 1998. Transport and metabolism of the essential vitamin  
916 pantothenic acid in human erythrocytes infected with the malaria parasite Plasmodium  
917 falciparum. *J Biol Chem* 273:10190–10195.
- 918 26. Gulati S, Eklund EH, Ruggles K V., Chan RB, Jayabalasingham B, Zhou B, Mantel  
919 PY, Lee MCS, Spottiswoode N, Coburn-Flynn O, Hjelmqvist D, Worgall TS, Marti M,  
920 Di Paolo G, Fidock DA. 2015. Profiling the Essential Nature of Lipid Metabolism in  
921 Asexual Blood and Gametocyte Stages of Plasmodium falciparum. *Cell Host Microbe*  
922 18:371–381.
- 923 27. Mamoun C Ben, Prigge ST, Vial H. 2010. Targeting the lipid metabolic pathways for  
924 the treatment of malaria. *Drug Dev Res.* John Wiley & Sons, Ltd.
- 925 28. Garten M, Beck JR. 2021. Structured to conquer: transport across the Plasmodium  
926 parasitophorous vacuole. *Curr Opin Microbiol.* Elsevier Ltd.
- 927 29. Kloehn J, Lacour CE, Soldati-Favre D. 2021. The metabolic pathways and  
928 transporters of the plastid organelle in Apicomplexa. *Curr Opin Microbiol* 63:250–258.
- 929 30. Beck JR, Ho CM. 2021. Transport mechanisms at the malaria parasite-host cell  
930 interface. *PLoS Pathog.* Public Library of Science.
- 931 31. Kenthirapalan S, Waters AP, Matuschewski K, Kooij TWA. 2016. Functional profiles of  
932 orphan membrane transporters in the life cycle of the malaria parasite. *Nat Commun*  
933 7:10519.
- 934 32. Sayers CP, Mollard V, Buchanan HD, McFadden GI, Goodman CD. 2018. A genetic

- 935 screen in rodent malaria parasites identifies five new apicoplast putative membrane  
936 transporters, one of which is essential in human malaria parasites. *Cell Microbiol*  
937 20:e12789.
- 938 33. Ginsburg H. 2006. Progress in in silico functional genomics: the malaria Metabolic  
939 Pathways database. *Trends Parasitol* 22:238–240.
- 940 34. Otto TD, Wilinski D, Assefa S, Keane TM, Sarry LR, Böhme U, Lemieux J, Barrell B,  
941 Pain A, Berriman M, Newbold C, Llinás M. 2010. New insights into the blood-stage  
942 transcriptome of *Plasmodium falciparum* using RNA-Seq. *Mol Microbiol* 76:12–24.
- 943 35. Wichers JS, Scholz JAM, Strauss J, Witt S, Lill A, Ehnold LI, Neupert N, Liffner B,  
944 Lühken R, Petter M, Lorenzen S, Wilson DW, Löw C, Lavazec C, Bruchhaus I,  
945 Tannich E, Gilberger TW, Bachmann A. 2019. Dissecting the gene expression,  
946 localization, membrane topology, and function of the plasmodium falciparum STEVOR  
947 protein family. *MBio* 10:e01500-19.
- 948 36. Treeck M, Sanders JL, Elias JE, Boothroyd JC. 2011. The phosphoproteomes of  
949 plasmodium falciparum and toxoplasma gondii reveal unusual adaptations within and  
950 beyond the parasites' boundaries. *Cell Host Microbe* 10:410–419.
- 951 37. Pease BN, Huttlin EL, Jedrychowski MP, Talevich E, Harmon J, Dillman T, Kannan N,  
952 Doerig C, Chakrabarti R, Gygi SP, Chakrabarti D. 2013. Global analysis of protein  
953 expression and phosphorylation of three stages of plasmodium falciparum  
954 intraerythrocytic development. *J Proteome Res* 12:4028–4045.
- 955 38. Aurrecochea C, Brestelli J, Brunk BP, Dommer J, Fischer S, Gajria B, Gao X, Gingle  
956 A, Grant G, Harb OS, Heiges M, Innamorato F, Iodice J, Kissinger JC, Kraemer E, Li  
957 W, Miller JA, Nayak V, Pennington C, Pinney DF, Roos DS, Ross C, Stoeckert CJ,  
958 Treatman C, Wang H. 2009. PlasmoDB: a functional genomic database for malaria  
959 parasites. *Nucleic Acids Res* 37:D539–D543.
- 960 39. Jumper J, Evans R, Pritzel A, Green T, Figurnov M, Ronneberger O,  
961 Tunyasuvunakool K, Bates R, Žídek A, Potapenko A, Bridgland A, Meyer C, Kohl  
962 SAA, Ballard AJ, Cowie A, Romera-Paredes B, Nikolov S, Jain R, Adler J, Back T,  
963 Petersen S, Reiman D, Clancy E, Zielinski M, Steinegger M, Pacholska M,  
964 Berghammer T, Bodenstern S, Silver D, Vinyals O, Senior AW, Kavukcuoglu K, Kohli  
965 P, Hassabis D. 2021. Highly accurate protein structure prediction with AlphaFold.  
966 *Nature* 596:583–589.
- 967 40. Holm L. 2020. DALI and the persistence of protein shape. *Protein Sci* 29:128–140.

- 968 41. Birnbaum J, Flemming S, Reichard N, Soares AB, Mesén-Ramírez P, Jonscher E,  
969 Bergmann B, Spielmann T. 2017. A genetic system to study *Plasmodium falciparum*  
970 protein function. *Nat Methods* 14:450–456.
- 971 42. Prommana P, Uthaipibull C, Wongsombat C, Kamchonwongpaisan S, Yuthavong Y,  
972 Knuepfer E, Holder AA, Shaw PJ. 2013. Inducible Knockdown of *Plasmodium* Gene  
973 Expression Using the glmS Ribozyme. *PLoS One* 8:e73783.
- 974 43. Tawk L, Chicanne G, Dubremetz J-F, Richard V, Payrastra B, Vial HJ, Roy C,  
975 Wengelnik K. 2010. Phosphatidylinositol 3-Phosphate, an Essential Lipid in  
976 *Plasmodium*, Localizes to the Food Vacuole Membrane and the Apicoplast. *Eukaryot*  
977 *Cell* 9:1519–1530.
- 978 44. Jonscher E, Flemming S, Schmitt M, Sabitzki R, Reichard N, Birnbaum J, Bergmann  
979 B, Höhn K, Spielmann T. 2019. PfVPS45 Is Required for Host Cell Cytosol Uptake by  
980 Malaria Blood Stage Parasites. *Cell Host Microbe* 25:166-173.e5.
- 981 45. Waller RF, Reed MB, Cowman AF, McFadden GI. 2000. Protein trafficking to the  
982 plastid of *Plasmodium falciparum* is via the secretory pathway. *EMBO J* 19:1794–  
983 1802.
- 984 46. Birnbaum J, Scharf S, Schmidt S, Jonscher E, Hoeijmakers WAM, Flemming S,  
985 Toenhake CG, Schmitt M, Sabitzki R, Bergmann B, Fröhlke U, Mesén-Ramírez P,  
986 Blancke Soares A, Herrmann H, Bártfai R, Spielmann T. 2020. A Kelch13-defined  
987 endocytosis pathway mediates artemisinin resistance in malaria parasites. *Science*  
988 (80- ) 367:51–59.
- 989 47. Inoue T, Heo W Do, Grimley JS, Wandless TJ, Meyer T. 2005. An inducible  
990 translocation strategy to rapidly activate and inhibit small GTPase signaling pathways.  
991 *Nat Methods* 2:415–418.
- 992 48. Geiger M, Brown C, Wichers JS, Strauss J, Lill A, Thuenauer R, Liffner B, Wilcke L,  
993 Lemcke S, Heincke D, Pazicky S, Bachmann A, Löw C, Wilson DW, Filarsky M, Burda  
994 P-C, Zhang K, Junop M, Gilberger TW. 2020. Structural Insights Into PfARO and  
995 Characterization of its Interaction With PfAIP. *J Mol Biol* 432:878–896.
- 996 49. Cabrera A, Herrmann S, Warszta D, Santos JM, John Peter AT, Kono M, Debrouver  
997 S, Jacobs T, Spielmann T, Ungermann C, Soldati-Favre D, Gilberger TW. 2012.  
998 Dissection of Minimal Sequence Requirements for Rhoptry Membrane Targeting in the  
999 Malaria Parasite. *Traffic* 13:1335–1350.
- 1000 50. Peterson MG, Marshall VM, Smythe JA, Crewther PE, Lew A, Silva A, Anders RF,

- 1001 Kemp DJ. 1989. Integral membrane protein located in the apical complex of  
1002 *Plasmodium falciparum*. *Mol Cell Biol* 9:3151–3154.
- 1003 51. Wichers JS, Wunderlich J, Heincke D, Pazicky S, Strauss J, Schmitt M, Kimmel J,  
1004 Wilcke L, Scharf S, von Thien H, Burda P, Spielmann T, Löw C, Filarsky M, Bachmann  
1005 A, Gilberger TW. 2021. Identification of novel inner membrane complex and apical  
1006 annuli proteins of the malaria parasite *Plasmodium falciparum*. *Cell Microbiol*  
1007 23:e13341.
- 1008 52. Jullien N, Goddard I, Selmi-Ruby S, Fina J-L, Cremer H, Herman J-P. 2007.  
1009 Conditional Transgenesis Using Dimerizable Cre (DiCre). *PLoS One* 2:e1355.
- 1010 53. Andenmatten N, Egarter S, Jackson AJ, Jullien N, Herman JP, Meissner M. 2013.  
1011 Conditional genome engineering in *Toxoplasma gondii* uncovers alternative invasion  
1012 mechanisms. *Nat Methods* 10:125–127.
- 1013 54. Holder AA, Lockyer MJ, Odink KG, Sandhu JS, Riveros-Moreno V, Nicholls SC,  
1014 Hillman Y, Davey LS, Tizard MLV, Schwarz RT, Freeman RR. 1985. Primary structure  
1015 of the precursor to the three major surface antigens of *Plasmodium falciparum*  
1016 merozoites. *Nature* 317:270–273.
- 1017 55. Mesén-Ramírez P, Bergmann B, Tran TT, Garten M, Stäcker J, Naranjo-Prado I, Höhn  
1018 K, Zimmerberg J, Spielmann T. 2019. EXP1 is critical for nutrient uptake across the  
1019 parasitophorous vacuole membrane of malaria parasites. *PLoS Biol* 17:e3000473.
- 1020 56. López-Barragán MJ, Lemieux J, Quiñones M, Williamson KC, Molina-Cruz A, Cui K,  
1021 Barillas-Mury C, Zhao K, Su X zhuan. 2011. Directional gene expression and  
1022 antisense transcripts in sexual and asexual stages of *Plasmodium falciparum*. *BMC*  
1023 *Genomics* 12:587.
- 1024 57. Lasonder E, Rijpma SR, Van Schaijk BCL, Hoeijmakers WAM, Kensche PR, Gresnigt  
1025 MS, Italiaander A, Vos MW, Woestenenk R, Bousema T, Mair GR, Khan SM, Janse  
1026 CJ, Bártfai R, Sauerwein RW. 2016. Integrated transcriptomic and proteomic analyses  
1027 of *P. Falciparum* gametocytes: Molecular insight into sex-specific processes and  
1028 translational repression. *Nucleic Acids Res* 44:6087–6101.
- 1029 58. Boltryk SD, Passecker A, Alder A, Carrington E, van de Vegte-Bolmer M, van Gemert  
1030 G-J, van der Starre A, Beck H-P, Sauerwein RW, Kooij TWA, Brancucci NMB,  
1031 Proellocks NI, Gilberger T-W, Voss TS. 2021. CRISPR/Cas9-engineered inducible  
1032 gametocyte producer lines as a valuable tool for *Plasmodium falciparum* malaria  
1033 transmission research. *Nat Commun* 12:4806.

- 1034 59. Filarsky M, Fraschka SA, Niederwieser I, Brancucci NMB, Carrington E, Carrió E,  
1035 Moes S, Jenoe P, Bártfai R, Voss TS. 2018. GDV1 induces sexual commitment of  
1036 malaria parasites by antagonizing HP1-dependent gene silencing. *Science* (80- )  
1037 359:1259–1263.
- 1038 60. Ennist NM, Stayrook SE, Dutton PL, Moser CC. 2017. 5VJT: De Novo Photosynthetic  
1039 Reaction Center Protein Equipped with Heme B and Zn(II) cations  
1040 <https://doi.org/10.2210/pdb5VJT/pdb>.
- 1041 61. Wunderlich J, Rohrbach P, Dalton JP. 2012. The malaria digestive vacuole. *Front*  
1042 *Biosci (Schol Ed)* 4:1424–48.
- 1043 62. Tabuchi M, Yoshimori T, Yamaguchi K, Yoshida T, Kishi F. 2000. Human  
1044 NRAMP2/DMT1, which mediates iron transport across endosomal membranes, is  
1045 localized to late endosomes and lysosomes in HEp-2 cells. *J Biol Chem* 275:22220–  
1046 22228.
- 1047 63. Zhang M, Wang C, Otto TD, Oberstaller J, Liao X, Adapa SR, Udenze K, Bronner IF,  
1048 Casandra D, Mayho M, Brown J, Li S, Swanson J, Rayner JC, Jiang RHY, Adams JH.  
1049 2018. Uncovering the essential genes of the human malaria parasite *Plasmodium*  
1050 *falciparum* by saturation mutagenesis. *Science* 360:eaap7847.
- 1051 64. Kennedy K, Cobbold SA, Hanssen E, Birnbaum J, Spillman NJ, McHugh E, Brown H,  
1052 Tilley L, Spielmann T, McConville MJ, Ralph SA. 2019. Delayed death in the malaria  
1053 parasite *Plasmodium falciparum* is caused by disruption of prenylation-dependent  
1054 intracellular trafficking. *PLOS Biol* 17:e3000376.
- 1055 65. Pasaje CFA, Cheung V, Kennedy K, Lim EE, Baell JB, Griffin MDW, Ralph SA. 2016.  
1056 Selective inhibition of apicoplast tryptophanyl-tRNA synthetase causes delayed death  
1057 in *Plasmodium falciparum*. *Sci Rep* 6:1–13.
- 1058 66. Yeh E, DeRisi JL. 2011. Chemical rescue of malaria parasites lacking an apicoplast  
1059 defines organelle function in blood-stage *plasmodium falciparum*. *PLoS Biol* 9.
- 1060 67. Bushell E, Gomes AR, Sanderson T, Anar B, Girling G, Herd C, Metcalf T,  
1061 Modrzynska K, Schwach F, Martin RE, Mather MW, McFadden GI, Parts L, Rutledge  
1062 GG, Vaidya AB, Wengelnik K, Rayner JC, Billker O. 2017. Functional Profiling of a  
1063 *Plasmodium* Genome Reveals an Abundance of Essential Genes. *Cell* 170:260-  
1064 272.e8.
- 1065 68. Chasen NM, Stasic AJ, Asady B, Coppens I, Moreno SNJ. 2019. The Vacuolar Zinc  
1066 Transporter TgZnT Protects *Toxoplasma gondii* from Zinc Toxicity. *mSphere*

- 1067 4:e00086-19.
- 1068 69. Jiang Y, Wei J, Cui H, Liu C, Zhi Y, Jiang Z, Li Z, Li S, Yang Z, Wang X, Qian P,  
1069 Zhang C, Zhong C, Su X, Yuan J. 2020. An intracellular membrane protein GEP1  
1070 regulates xanthurenic acid induced gametogenesis of malaria parasites. *Nat Commun*  
1071 11:1764.
- 1072 70. Sonnhammer EL, von Heijne G, Krogh A. 1998. A hidden Markov model for predicting  
1073 transmembrane helices in protein sequences. *Proceedings Int Conf Intell Syst Mol Biol*  
1074 6:175–82.
- 1075 71. Käll L, Krogh A, Sonnhammer ELL. 2004. A combined transmembrane topology and  
1076 signal peptide prediction method. *J Mol Biol* 338:1027–1036.
- 1077 72. Liu W, Sundararaman SA, Loy DE, Learn GH, Li Y, Plenderleith LJ, Ndjango JBN,  
1078 Speede S, Atencia R, Cox D, Shaw GM, Ayoub A, Peeters M, Rayner JC, Hahn BH,  
1079 Sharp PM. 2016. Multigenomic delineation of Plasmodium species of the Laverania  
1080 subgenus infecting wild-living chimpanzees and gorillas. *Genome Biol Evol* 8:1929–  
1081 1939.
- 1082 73. Zanghi G, Vembar SS, Baumgarten S, Ding S, Guizetti J, Bryant JM, Mattei D, Jensen  
1083 ATR, Rénia L, Goh YS, Sauerwein R, Hermsen CC, Franetich J-F, Bordessoulles M,  
1084 Silvie O, Soulard V, Scatton O, Chen P, Mecheri S, Mazier D, Scherf A. 2018. A  
1085 Specific PfEMP1 Is Expressed in *P. falciparum* Sporozoites and Plays a Role in  
1086 Hepatocyte Infection. *Cell Rep* 22:2951–2963.
- 1087 74. Gómez-Díaz E, Yerbanga RS, Lefèvre T, Cohuet A, Rowley MJ, Ouedraogo JB,  
1088 Corces VG. 2017. Epigenetic regulation of Plasmodium falciparum clonally variant  
1089 gene expression during development in Anopheles gambiae. *Sci Rep* 7.
- 1090 75. Howick VM, Russell AJC, Andrews T, Heaton H, Reid AJ, Natarajan K, Butungi H,  
1091 Metcalf T, Verzier LH, Rayner JC, Berriman M, Herren JK, Billker O, Hemberg M,  
1092 Talman AM, Lawniczak MKN. 2019. The malaria cell atlas: Single parasite  
1093 transcriptomes across the complete Plasmodium life cycle. *Science (80- )* 365.
- 1094 76. Burda P-C, Crosskey T, Lauk K, Zurborg A, Söhnchen C, Liffner B, Wilcke L, Strauss  
1095 J, Jeffries CM, Svergun DI, Wilson DW, Wilmanns M, Gilberger T-W, Pietsch E,  
1096 Strauss J, Jeffries CM, Svergun DI, Wilson DW, Wilmanns M, Gilberger T-W. 2020.  
1097 Structure-Based Identification and Functional Characterization of a Lipocalin in the  
1098 Malaria Parasite Plasmodium falciparum. *Cell Rep* 31:107817.
- 1099 77. Auburn S, Böhme U, Steinbiss S, Trimarsanto H, Hostetler J, Sanders M, Gao Q,

- 1100 Nosten F, Newbold CI, Berriman M, Price RN, Otto TD. 2016. A new *Plasmodium*  
1101 *vivax* reference sequence with improved assembly of the subtelomeres reveals an  
1102 abundance of *pir* genes. *Wellcome Open Res* 1:4.
- 1103 78. Pain A, Böhme U, Berry AE, Mungall K, Finn RD, Jackson AP, Mourier T, Mistry J,  
1104 Pasini EM, Aslett MA, Balasubrammaniam S, Borgwardt K, Brooks K, Carret C, Carver  
1105 TJ, Cherevach I, Chillingworth T, Clark TG, Galinski MR, Hall N, Harper D, Harris D,  
1106 Hauser H, Ivens A, Janssen CS, Keane T, Larke N, Lapp S, Marti M, Moule S, Meyer  
1107 IM, Ormond D, Peters N, Sanders M, Sanders S, Sargeant TJ, Simmonds M, Smith F,  
1108 Squares R, Thurston S, Tivey AR, Walker D, White B, Zuiderwijk E, Churcher C, Quail  
1109 MA, Cowman AF, Turner CMR, Rajandream MA, Kocken CHM, Thomas AW,  
1110 Newbold CI, Barrell BG, Berriman M. 2008. The genome of the simian and human  
1111 malaria parasite *Plasmodium knowlesi*. *Nature* 455:799–803.
- 1112 79. Trager W, Jensen JB. 1997. Continuous culture of *Plasmodium falciparum*: its impact  
1113 on malaria research. *Int J Parasitol* 27:989–1006.
- 1114 80. Lambros C, Vanderberg JP. 1979. Synchronization of *Plasmodium falciparum*  
1115 Erythrocytic Stages in Culture. *J Parasitol* 65:418.
- 1116 81. Ponnudurai T, Lensen AHW, Meis JFGM, Meuwissen JHE. 1986. Synchronization of  
1117 *Plasmodium falciparum* gametocytes using an automated suspension culture system.  
1118 *Parasitology* 93:263–274.
- 1119 82. Rivadeneira E, Wasserman M, Espinal C. 1983. Separation and Concentration of  
1120 Schizonts of *Plasmodium falciparum* by Percoll Gradients. *J Protozool* 30:367–370.
- 1121 83. Moon RW, Hall J, Rangkuti F, Ho YS, Almond N, Mitchell GH, Pain A, Holder AA,  
1122 Blackman MJ. 2013. Adaptation of the genetically tractable malaria pathogen  
1123 *Plasmodium knowlesi* to continuous culture in human erythrocytes. *Proc Natl Acad Sci*  
1124 110:531–536.
- 1125 84. Ganesan SM, Morrisey JM, Ke H, Painter HJ, Laroia K, Phillips MA, Rathod PK,  
1126 Mather MW, Vaidya AB. 2011. Yeast dihydroorotate dehydrogenase as a new  
1127 selectable marker for *Plasmodium falciparum* transfection. *Mol Biochem Parasitol*  
1128 177:29–34.
- 1129 85. Grüning C, Spielmann T. 2012. Imaging of live malaria blood stage parasites. *Methods*  
1130 *Enzymol* 506:81–92.
- 1131 86. Bachmann A, Scholz JAM, Janßen M, Klinkert M-Q, Tannich E, Bruchhaus I, Petter M.  
1132 2015. A comparative study of the localization and membrane topology of members of



- 1133 the RIFIN, STEVOR and PfMC-2TM protein families in Plasmodium falciparum-  
1134 infected erythrocytes. *Malar J* 14:274.
- 1135 87. Collins CR, Hackett F, Strath M, Penzo M, Withers-Martinez C, Baker DA, Blackman  
1136 MJ. 2013. Malaria Parasite cGMP-dependent Protein Kinase Regulates Blood Stage  
1137 Merozoite Secretory Organelle Discharge and Egress. *PLoS Pathog* 9:e1003344.
- 1138 88. Tonkin CJ, Van Dooren GG, Spurck TP, Struck NS, Good RT, Handman E, Cowman  
1139 AF, McFadden GI. 2004. Localization of organellar proteins in Plasmodium falciparum  
1140 using a novel set of transfection vectors and a new immunofluorescence fixation  
1141 method. *Mol Biochem Parasitol* 137:13–21.
- 1142 89. Blackman MJ, Whittle H, Holder AA. 1991. Processing of the Plasmodium falciparum  
1143 major merozoite surface protein-1: identification of a 33-kilodalton secondary  
1144 processing product which is shed prior to erythrocyte invasion. *Mol Biochem Parasitol*  
1145 49:35–44.
- 1146 90. Schindelin J, Arganda-Carreras I, Frise E, Kaynig V, Longair M, Pietzsch T, Preibisch  
1147 S, Rueden C, Saalfeld S, Schmid B, Tinevez J-Y, White DJ, Hartenstein V, Eliceiri K,  
1148 Tomancak P, Cardona A. 2012. Fiji: an open-source platform for biological-image  
1149 analysis. *Nat Methods* 9:676–682.
- 1150 91. Mesén-Ramírez P, Reinsch F, Blancke Soares A, Bergmann B, Ullrich AK, Tenzer S,  
1151 Spielmann T. 2016. Stable Translocation Intermediates Jam Global Protein Export in  
1152 Plasmodium falciparum Parasites and Link the PTEX Component EXP2 with  
1153 Translocation Activity. *PLoS Pathog* 12:e1005618.
- 1154 92. Struck NS, de Souza Dias S, Langer C, Marti M, Pearce JA, Cowman AF, Gilberger  
1155 TW. 2005. Re-defining the Golgi complex in Plasmodium falciparum using the novel  
1156 Golgi marker PfGRASP. *J Cell Sci* 118:5603–5613.
- 1157 93. Malleret B, Claser C, Ong ASM, Suwanarusk R, Sriprawat K, Howland SW, Russell B,  
1158 Nosten F, Rénia L. 2011. A rapid and robust tri-color flow cytometry assay for  
1159 monitoring malaria parasite development. *Sci Rep* 1:118.
- 1160 94. Wichers JS, van Gelder C, Fuchs G, Ruge JM, Pietsch E, Ferreira JL, Safavi S, von  
1161 Thien H, Burda P-C, Mesén-Ramírez P, Spielmann T, Strauss J, Gilberger T-W,  
1162 Bachmann A. 2021. Characterization of Apicomplexan Amino Acid Transporters  
1163 (ApiATs) in the Malaria Parasite Plasmodium falciparum. *mSphere* 6.
- 1164 95. Galen SC, Borner J, Martinsen ES, Schaer J, Austin CC, West CJ, Perkins SL. 2018.  
1165 The polyphyly of Plasmodium: Comprehensive phylogenetic analyses of the malaria

- 1166 parasites (Order Haemosporida) reveal widespread taxonomic conflict. *R Soc Open*  
1167 *Sci* 5.
- 1168 96. Yu G, Smith DK, Zhu H, Guan Y, Lam TT-Y. 2017. ggtree: an r package for  
1169 visualization and annotation of phylogenetic trees with their covariates and other  
1170 associated data. *Methods Ecol Evol* 8:28–36.
- 1171 97. Yu G. 2020. Using ggtree to Visualize Data on Tree-Like Structures. *Curr Protoc*  
1172 *Bioinforma* 69:e96.
- 1173 98. Katoh K, Standley DM. 2013. MAFFT Multiple Sequence Alignment Software Version  
1174 7: Improvements in Performance and Usability. *Mol Biol Evol* 30:772–780.
- 1175 99. Madeira F, Park YM, Lee J, Buso N, Gur T, Madhusoodanan N, Basutkar P, Tivey  
1176 ARN, Potter SC, Finn RD, Lopez R. 2019. The EMBL-EBI search and sequence  
1177 analysis tools APIs in 2019. *Nucleic Acids Res* 47:W636–W641.
- 1178 100. Davis MW, Jorgensen EM. 2022. ApE, A Plasmid Editor: A Freely Available DNA  
1179 Manipulation and Visualization Program. *Front Bioinforma* 2:5.
- 1180 101. Lord SJ, Velle KB, Mullins RD, Fritz-Laylin LK. 2020. SuperPlots: Communicating  
1181 reproducibility and variability in cell biology. *J Cell Biol* 219.
- 1182 102. Tibúrcio M, Hitz E, Niederwieser I, Kelly G, Davies H, Doerig C, Billker O, Voss TS,  
1183 Treeck M. 2021. A 39-Amino-Acid C-Terminal Truncation of GDV1 Disrupts Sexual  
1184 Commitment in *Plasmodium falciparum*. *mSphere* 6.
- 1185 103. Eksi S, Morahan BJ, Haile Y, Furuya T, Jiang H, Ali O, Xu H, Kiattitubtr K, Suri A,  
1186 Czesny B, Adeyemo A, Myers TG, Sattabongkot J, Su X zhuan, Williamson KC. 2012.  
1187 *Plasmodium falciparum* Gametocyte Development 1 (Pfgdv1) and Gametocytogenesis  
1188 Early Gene Identification and Commitment to Sexual Development. *PLoS Pathog* 8.
- 1189

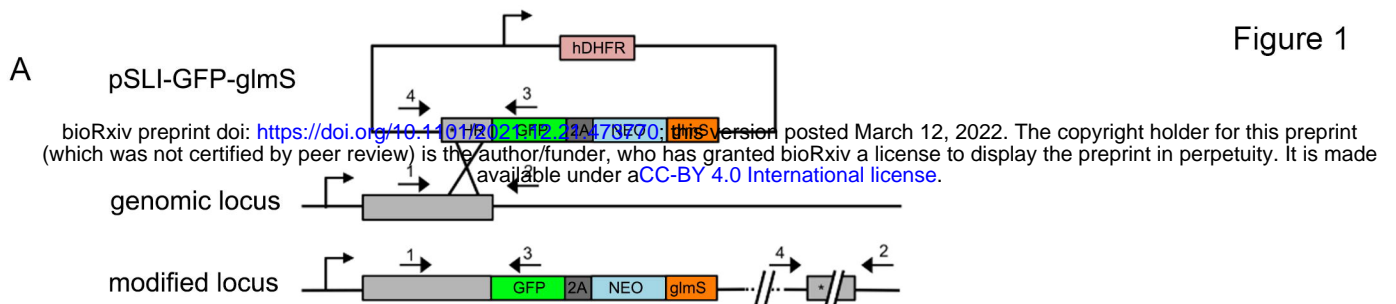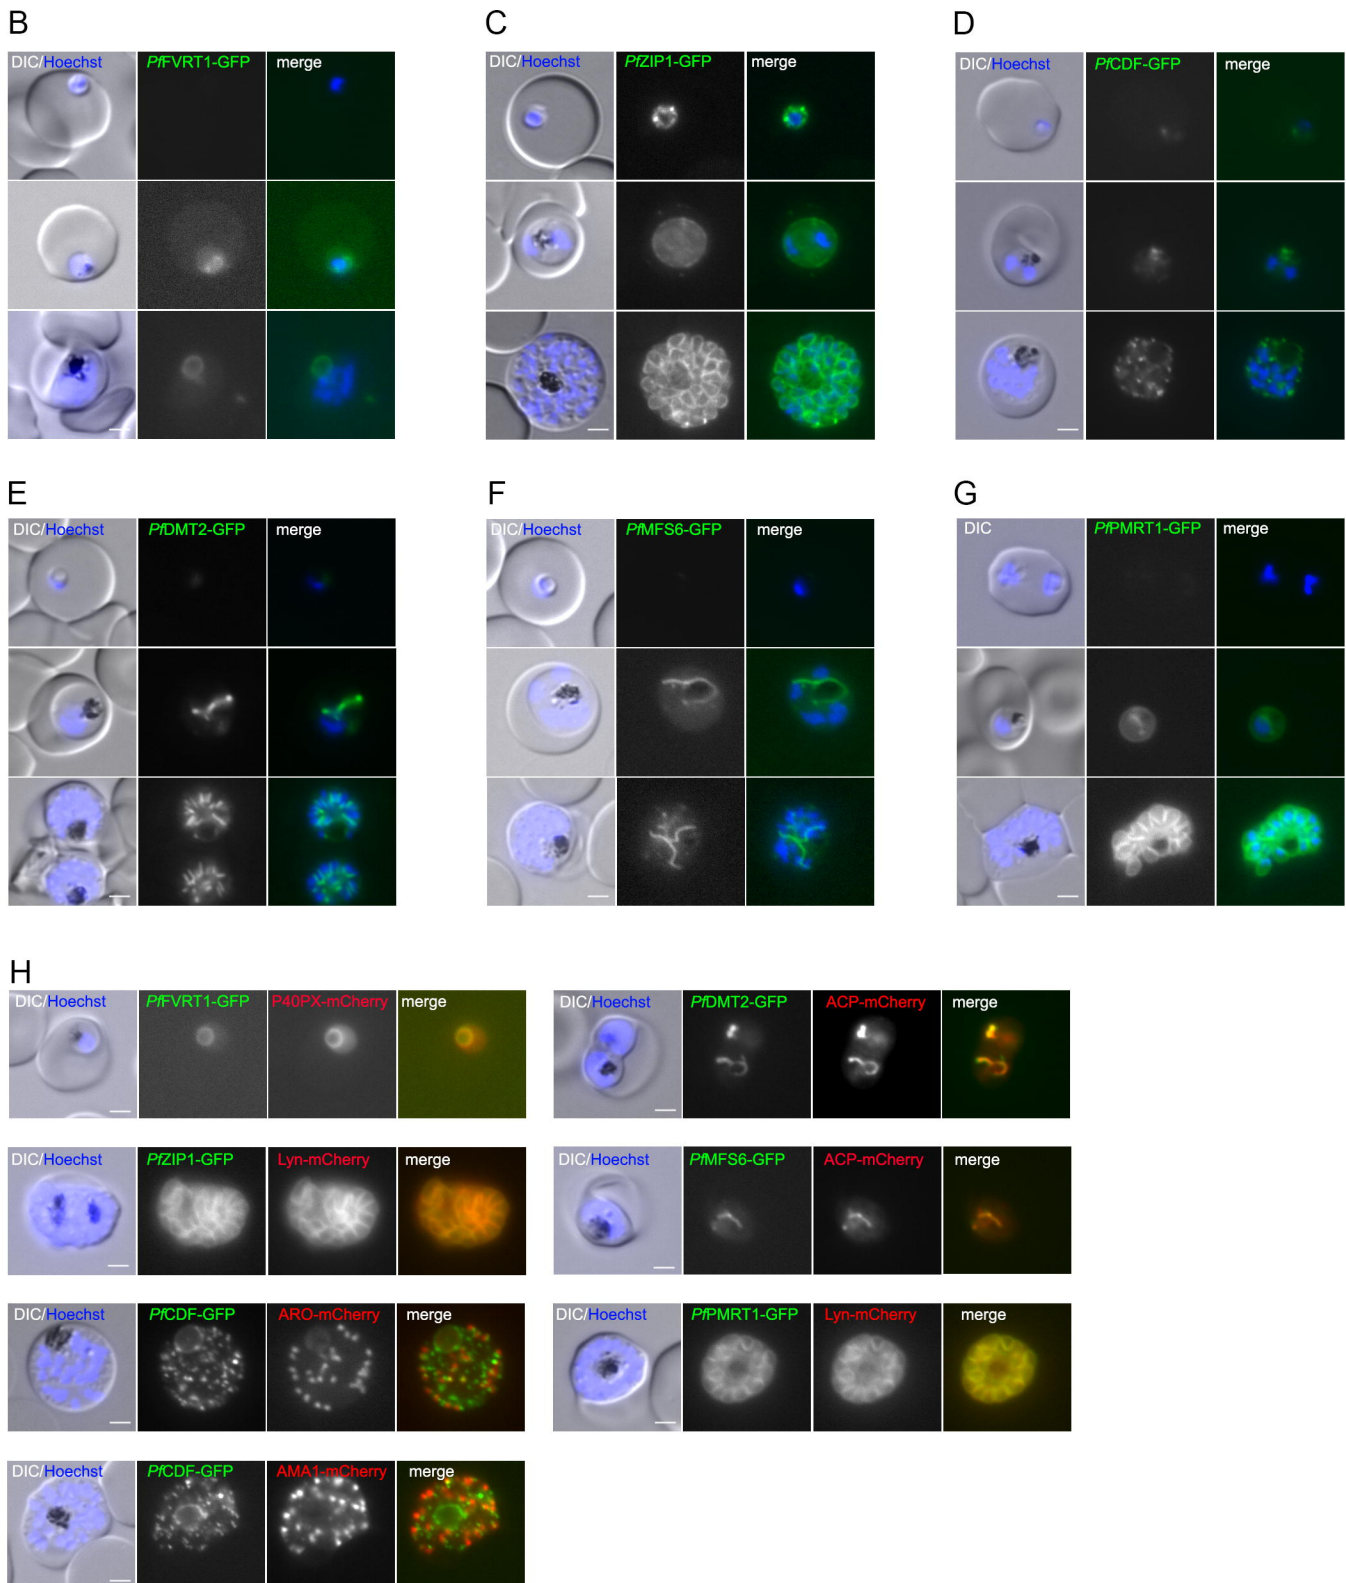

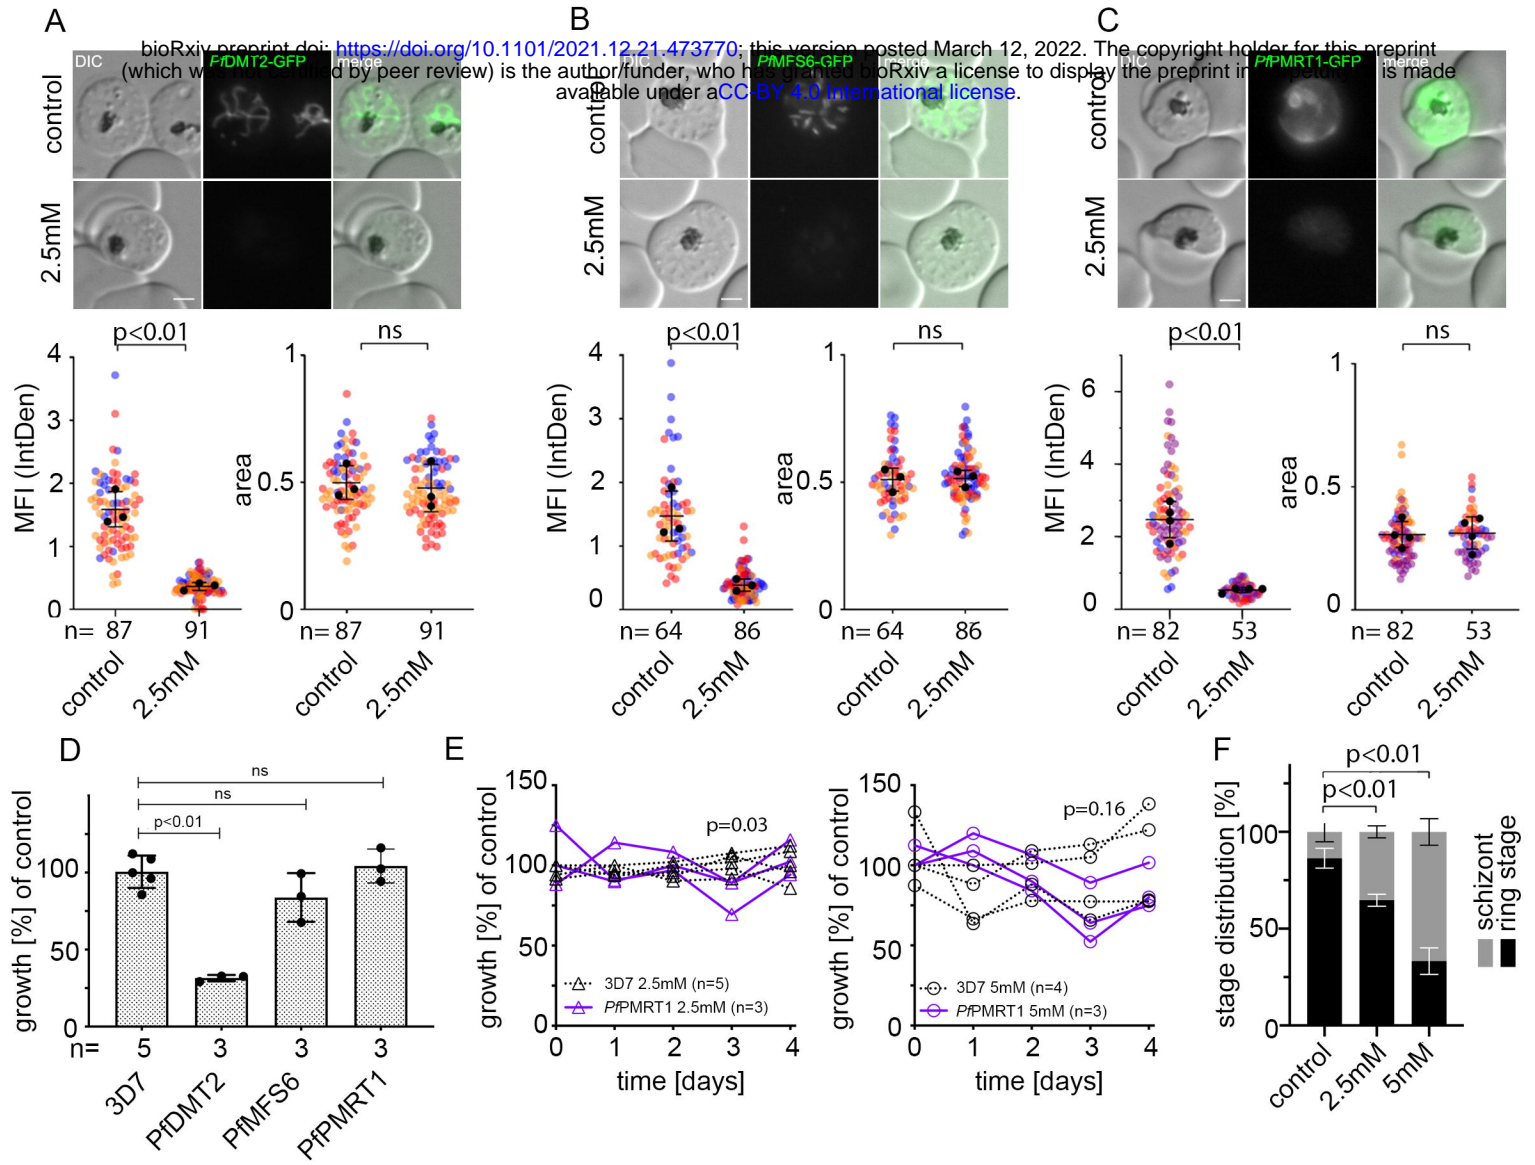

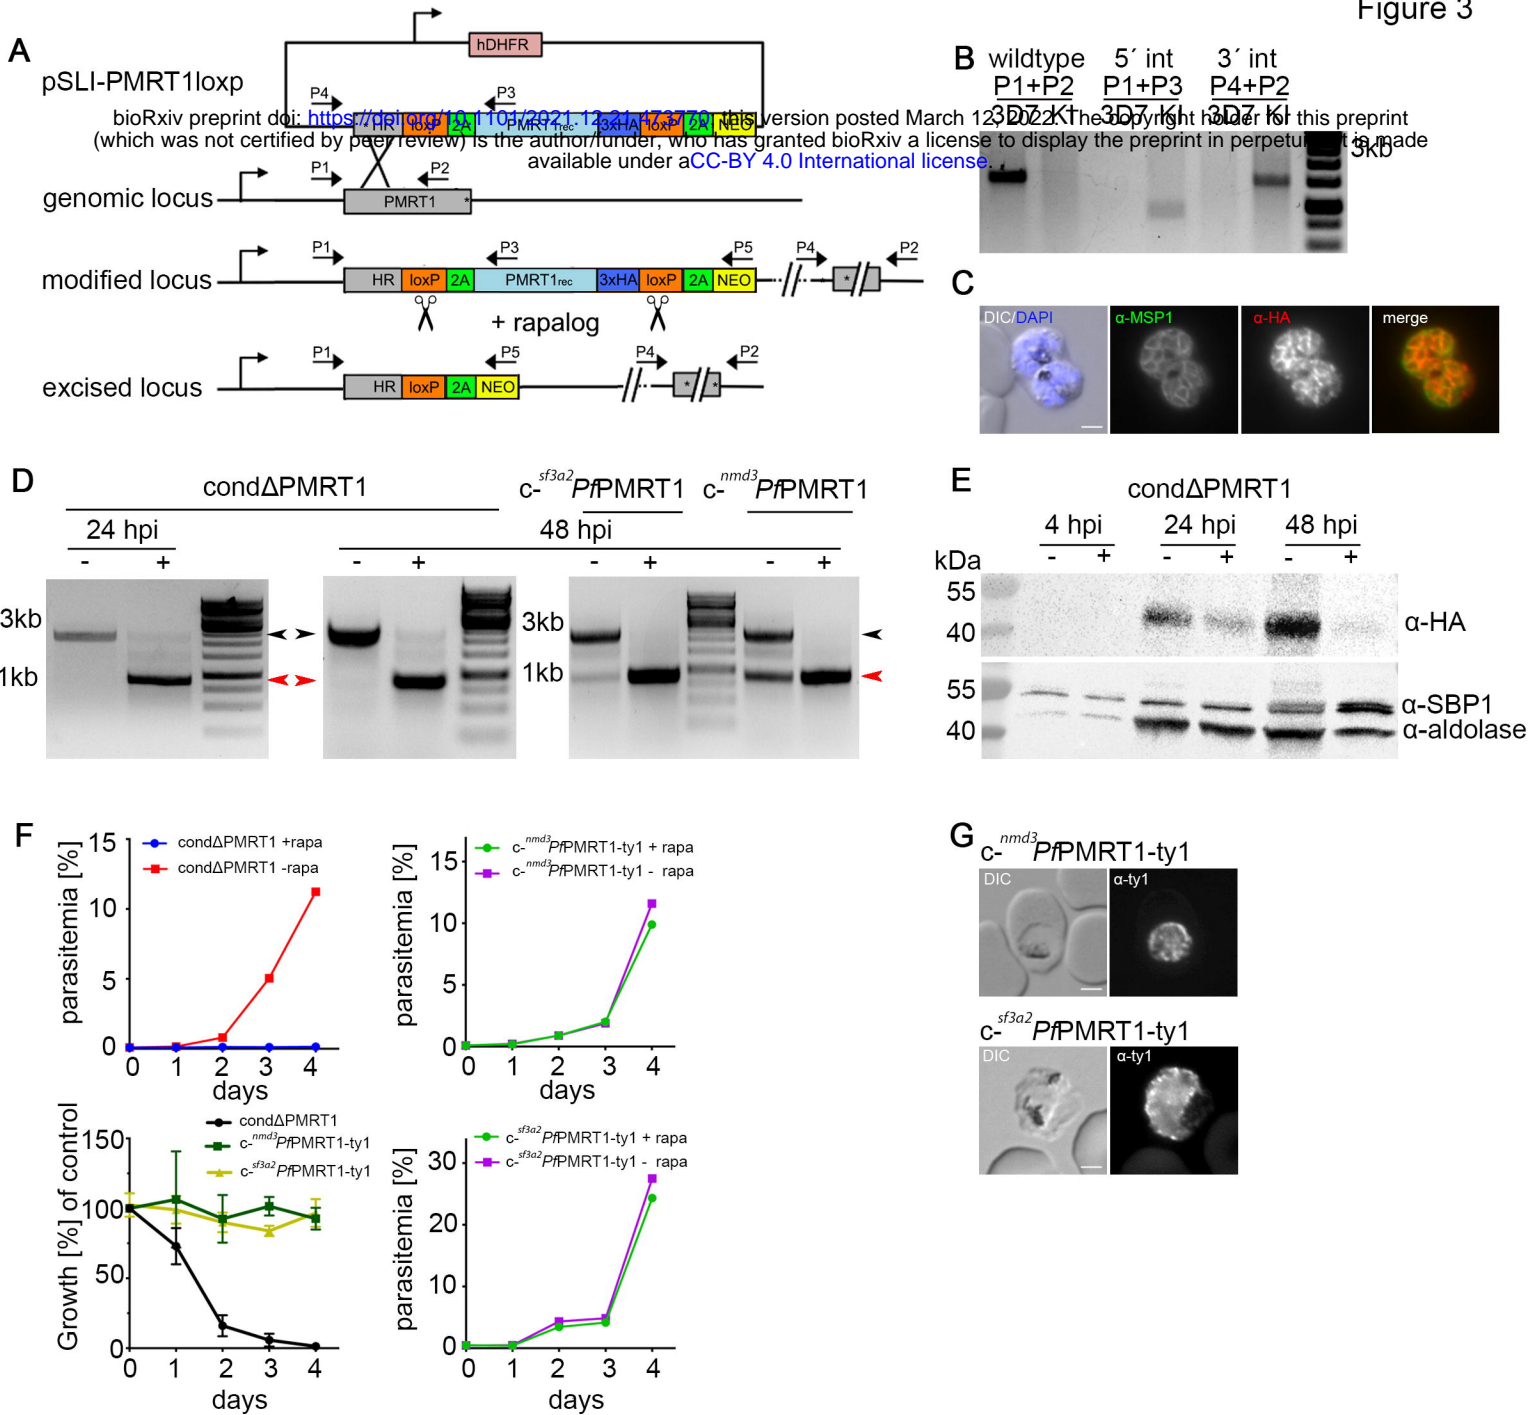

A

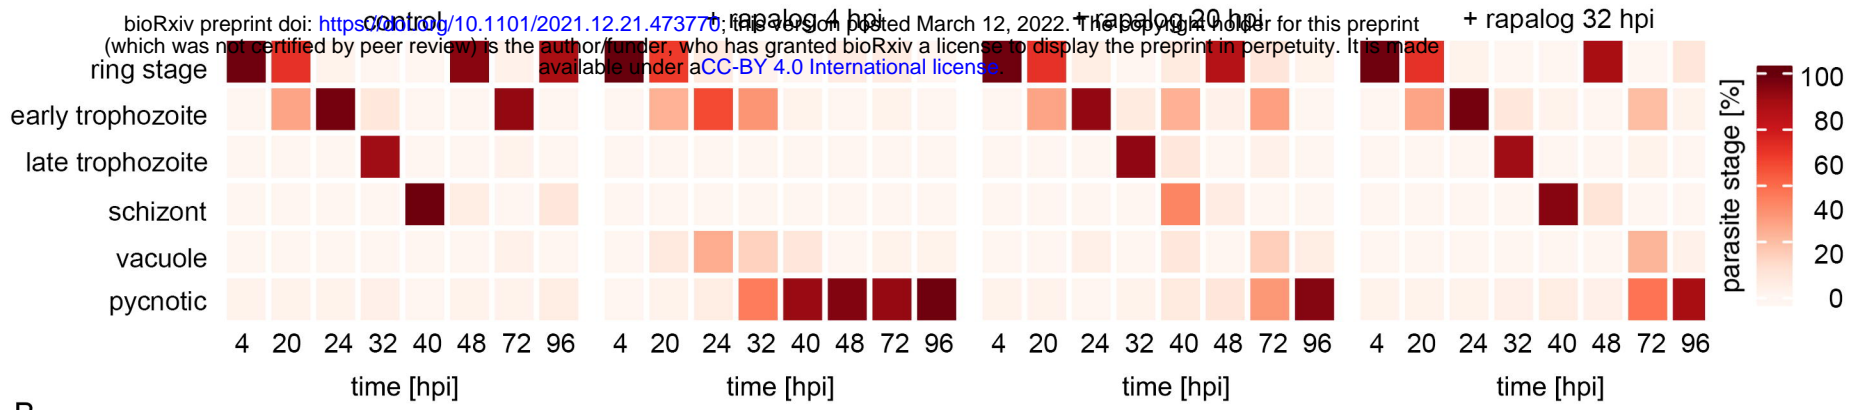

B

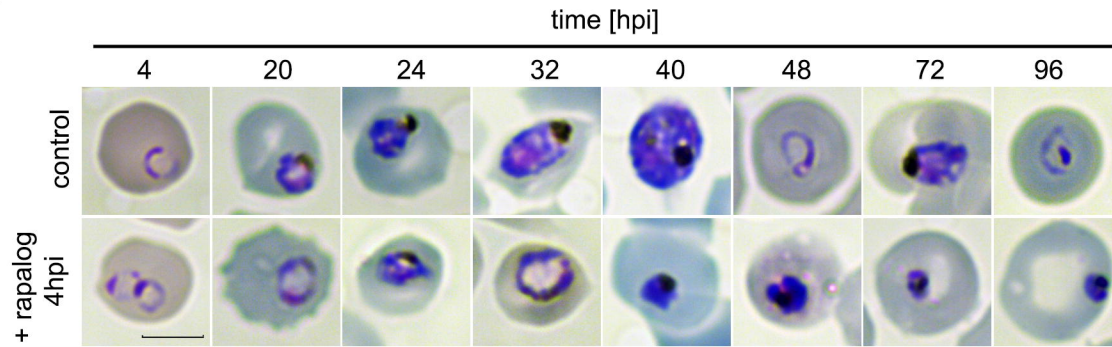

C

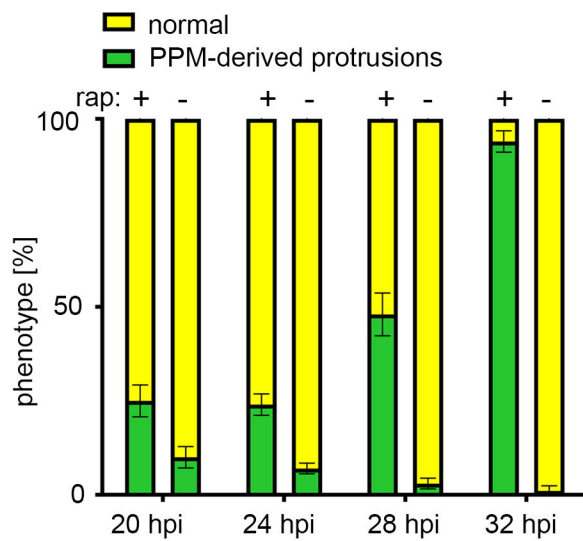

D

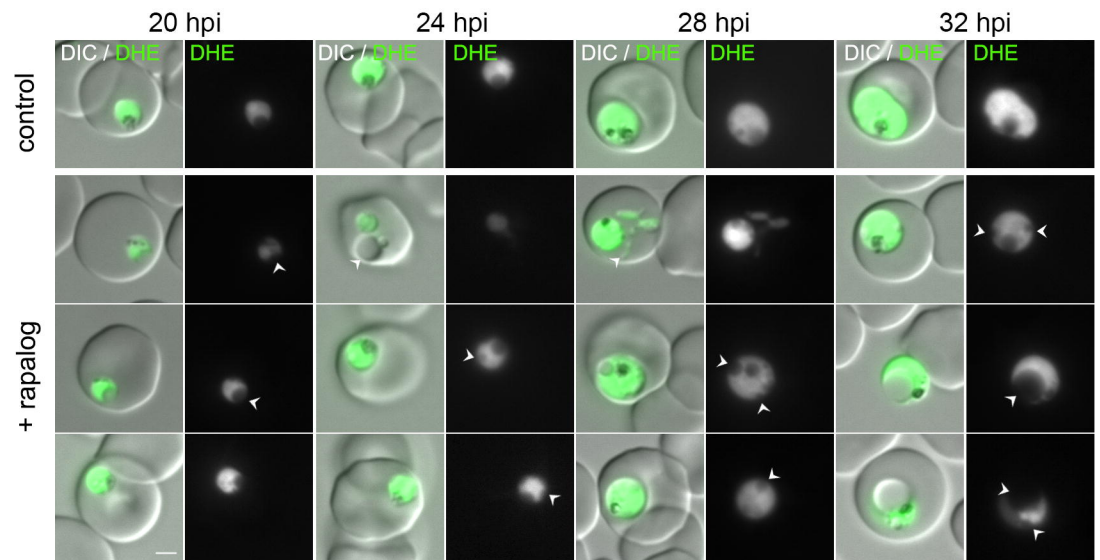

E

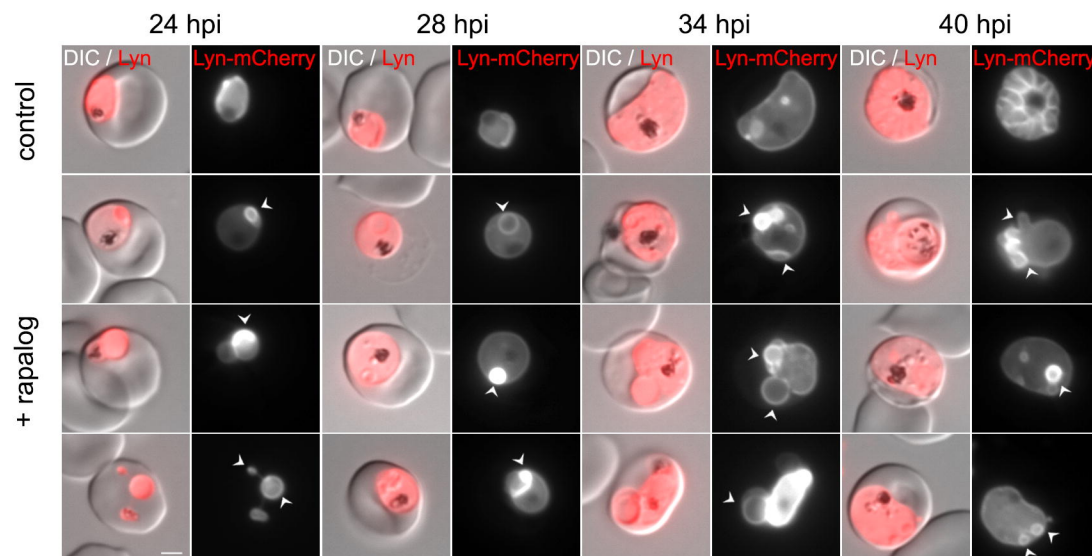

F

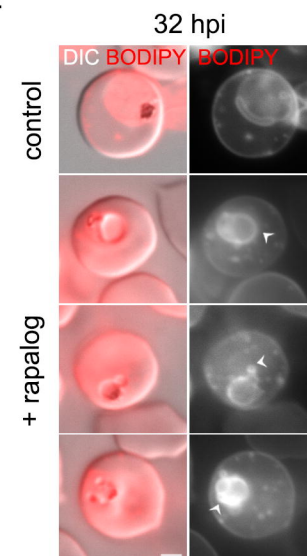

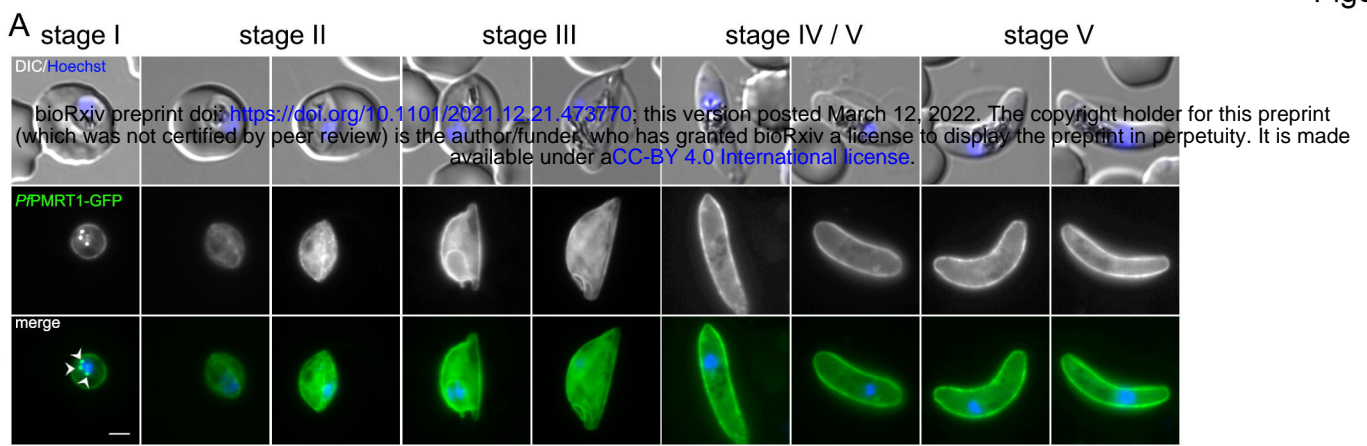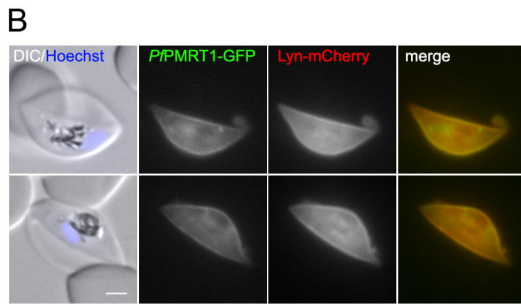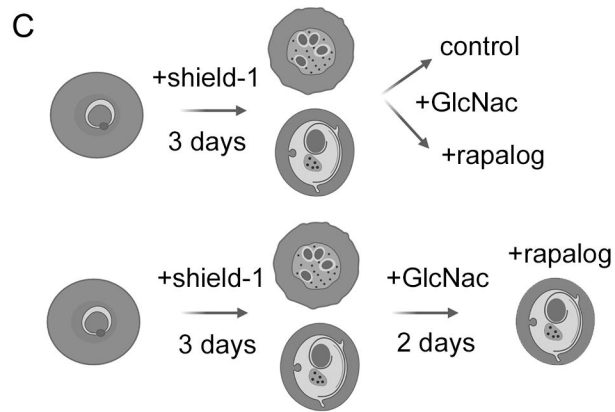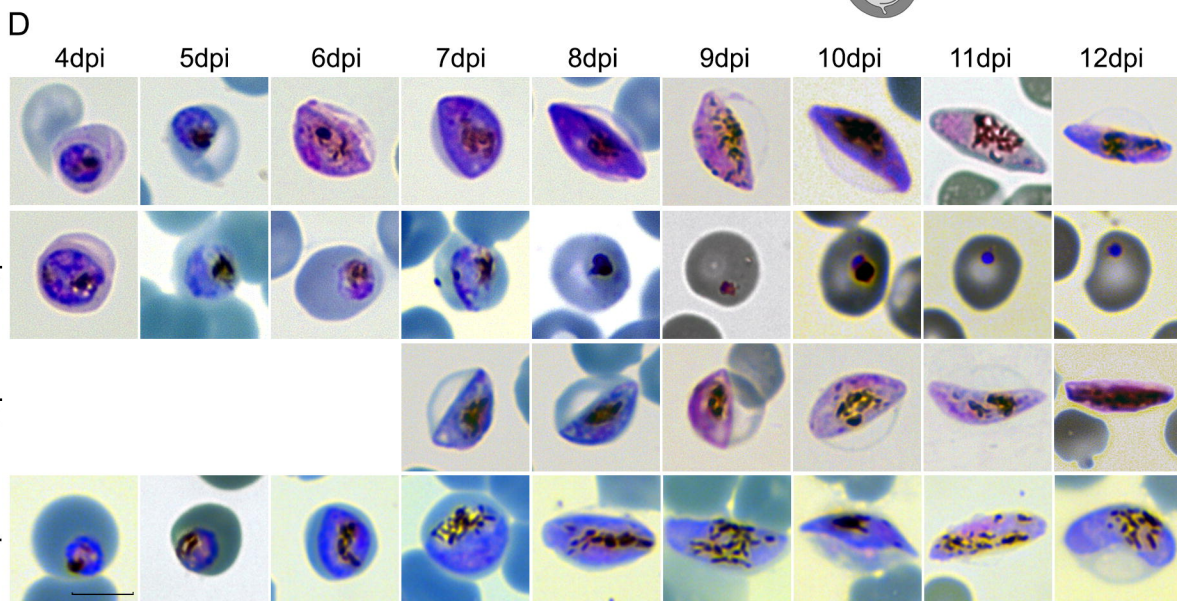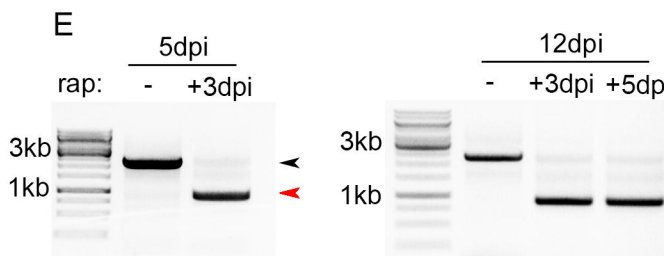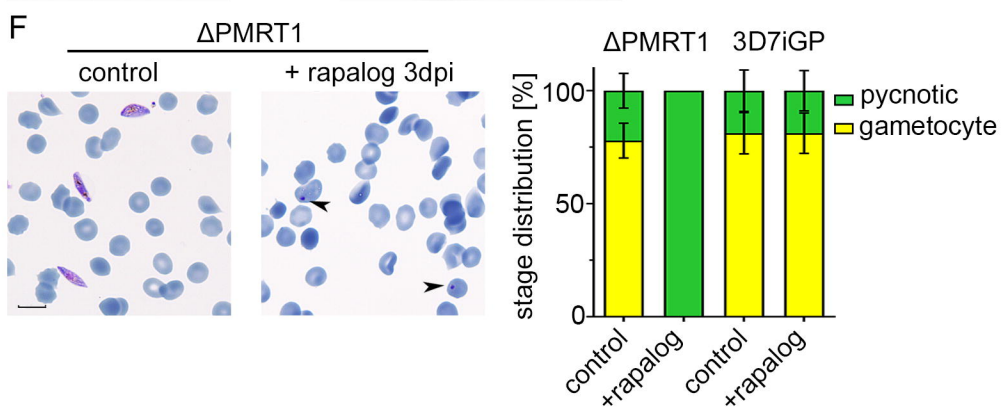

A

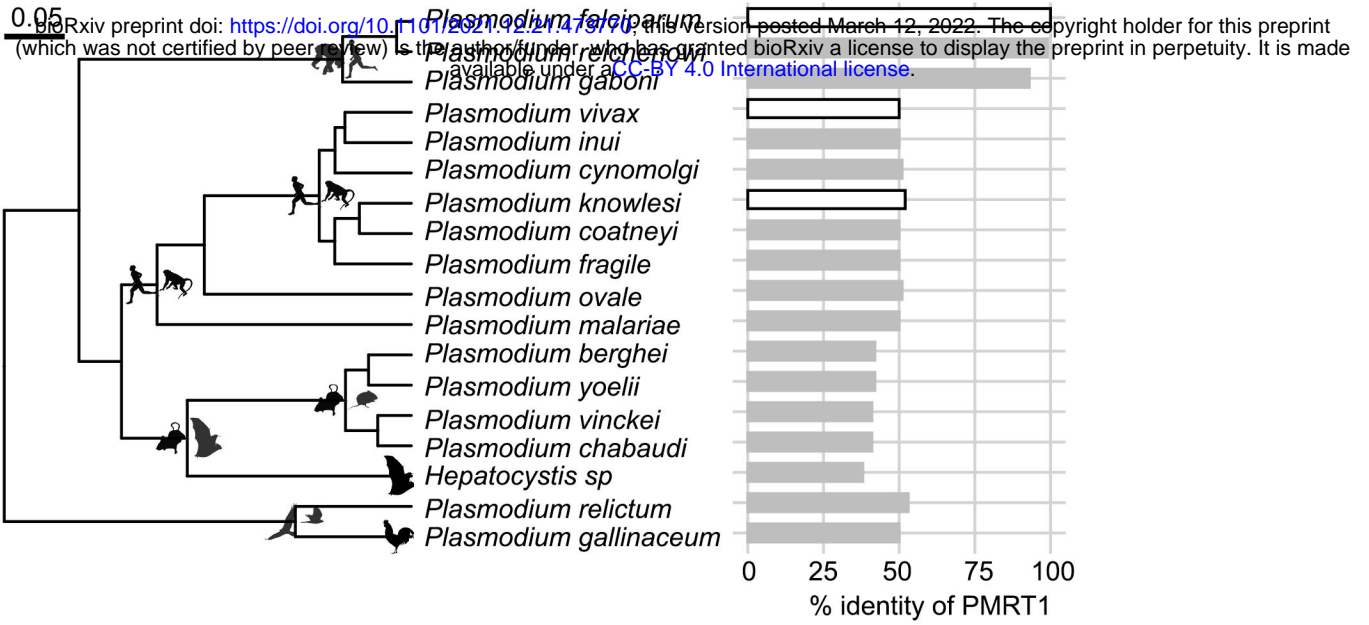

B

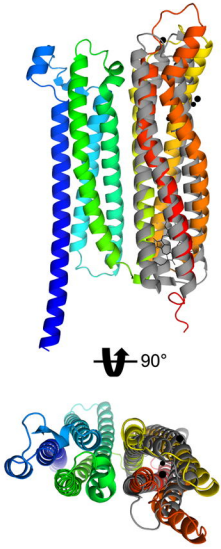

C

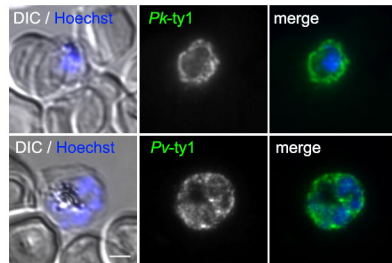

D

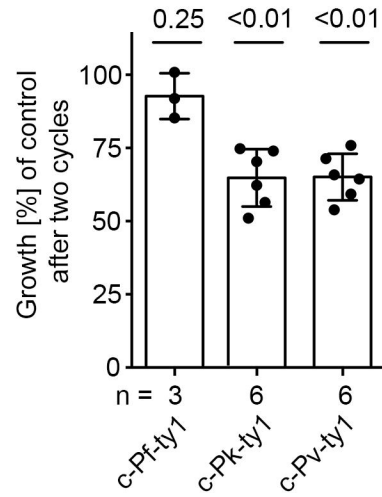

E

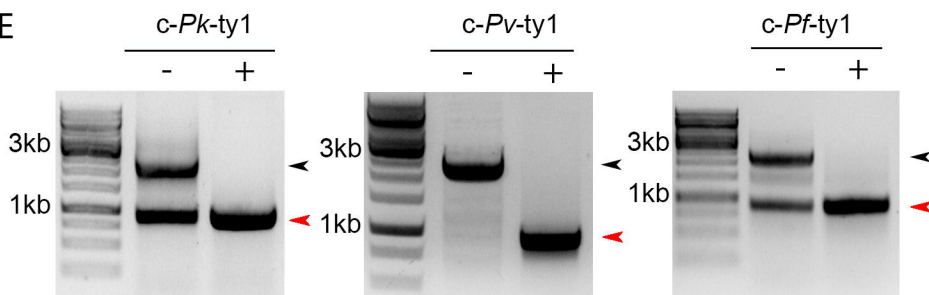

Source: https://www.biorxiv.org/content/10.1101/2021.12.21.473770v2.full.pdf
